# Supplementary material for: Reversible phosphorylation of cyclin T1 promotes assembly and stability of P-TEFb
Source: eLife. 2021 Nov 25;10:e68473. doi: 10.7554/eLife.68473 (PMC8648303; doi:10.7554/eLife.68473)

Reversible phosphorylation of cyclin T1 promotes  
assembly and stability of P-TEFb

Fig. 1. Critical residues in CycT1 (Thr143 and Thr149) are required for its binding to CDK9

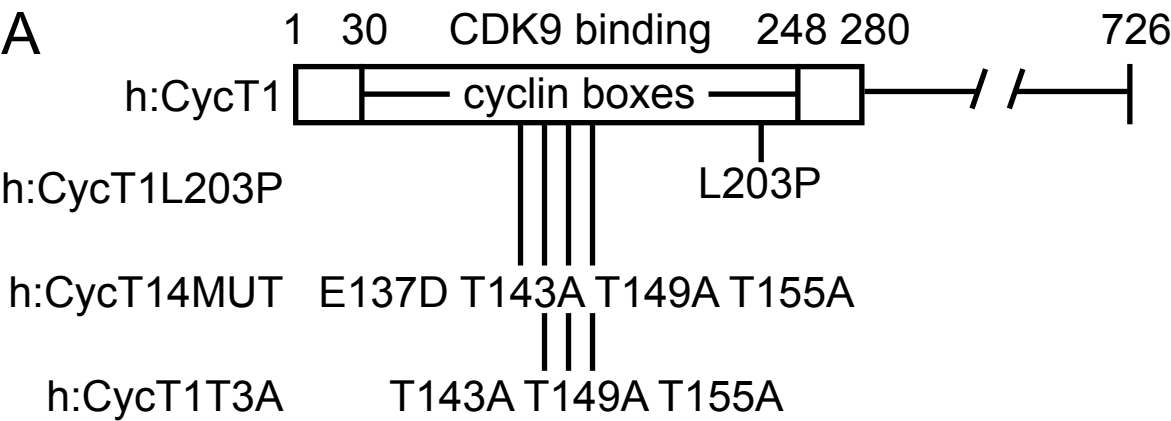

## Source blot for Figure 1B

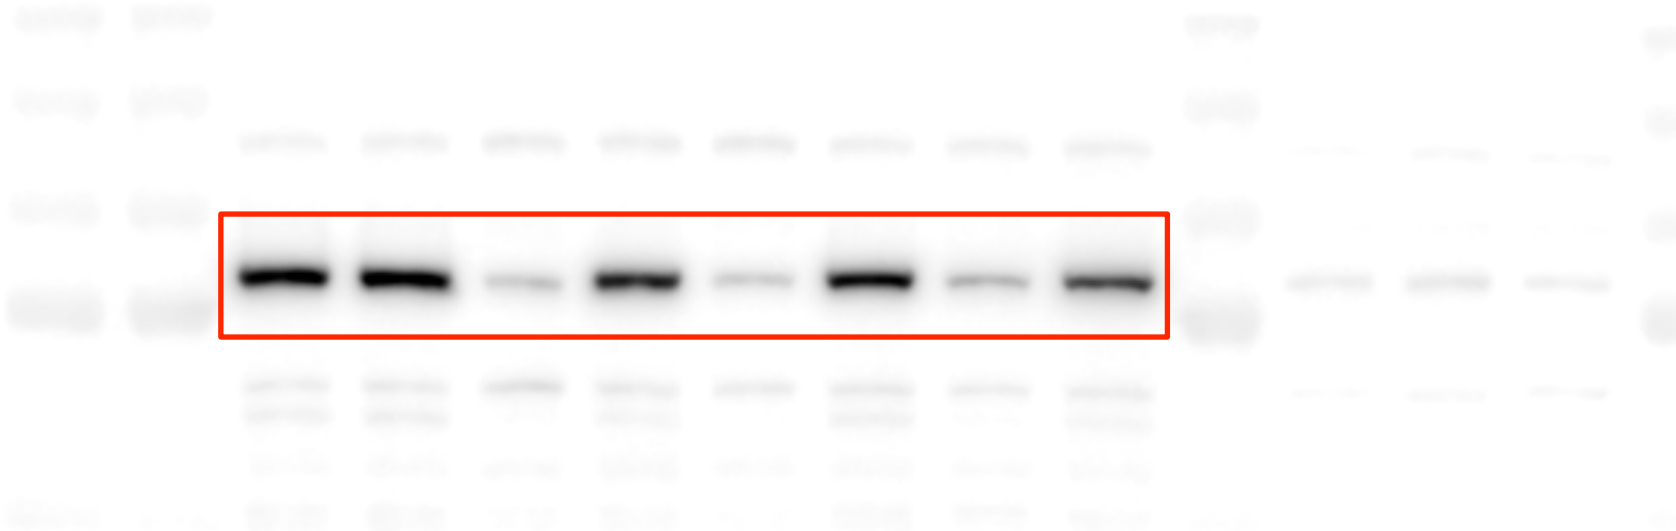

Red marked area was used for the figure.

Membrane was cut after transfer, and before probing by Ab

Source blot for Figure 1B

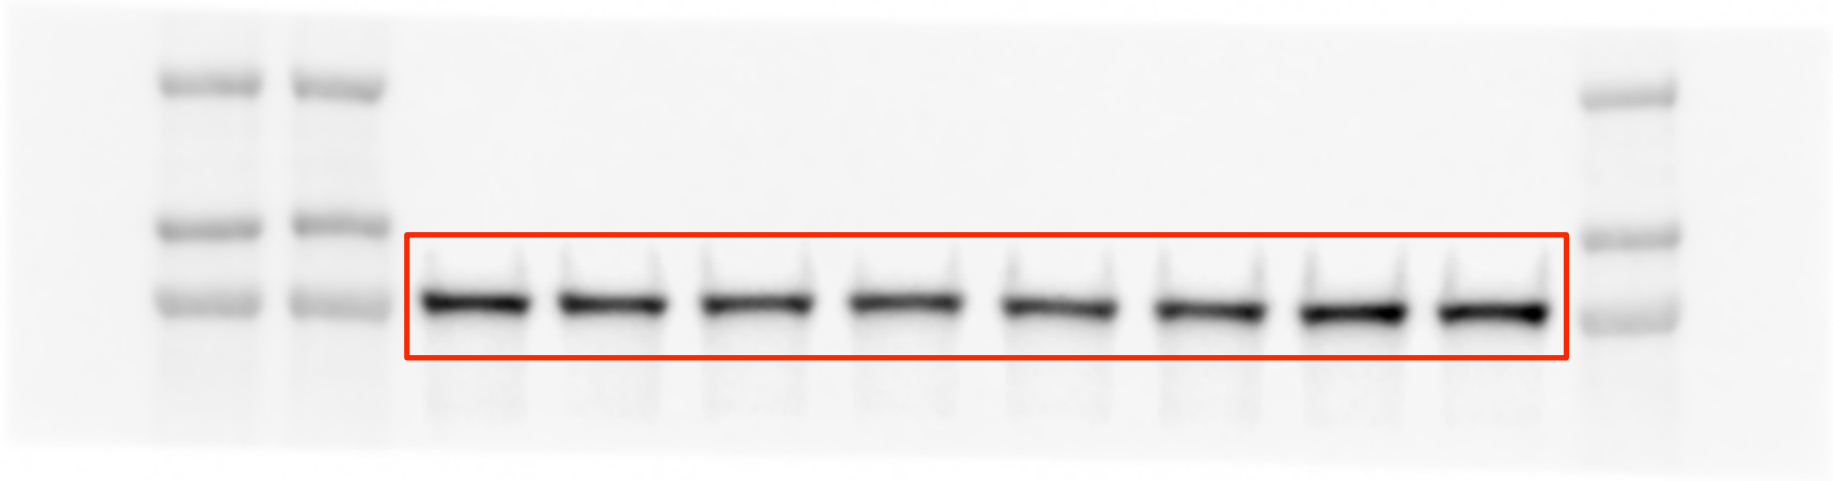

Red marked area was used for the figure.

Membrane was cut after transfer, and before probing by Ab

## Source blot for Figure 1B

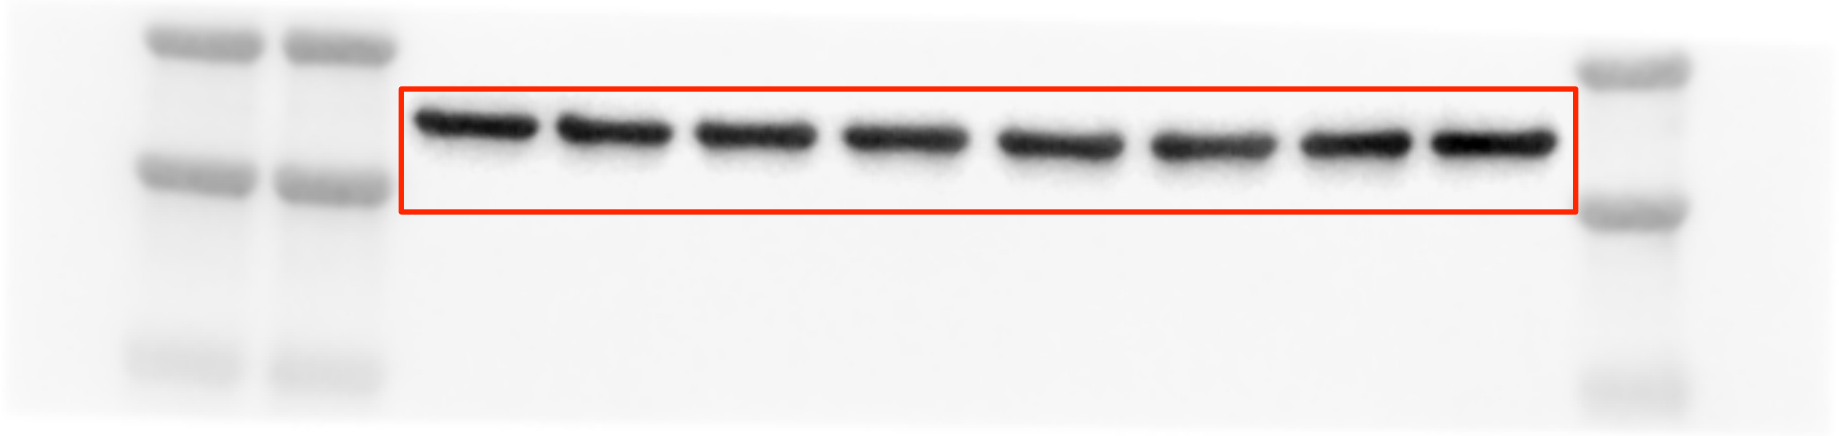

Red marked area was used for the figure.  
Membrane was cut after transfer, and before probing by Ab

Fig. 1. Critical residues in CycT1 (Thr143 and Thr149) are required for its binding to CDK9

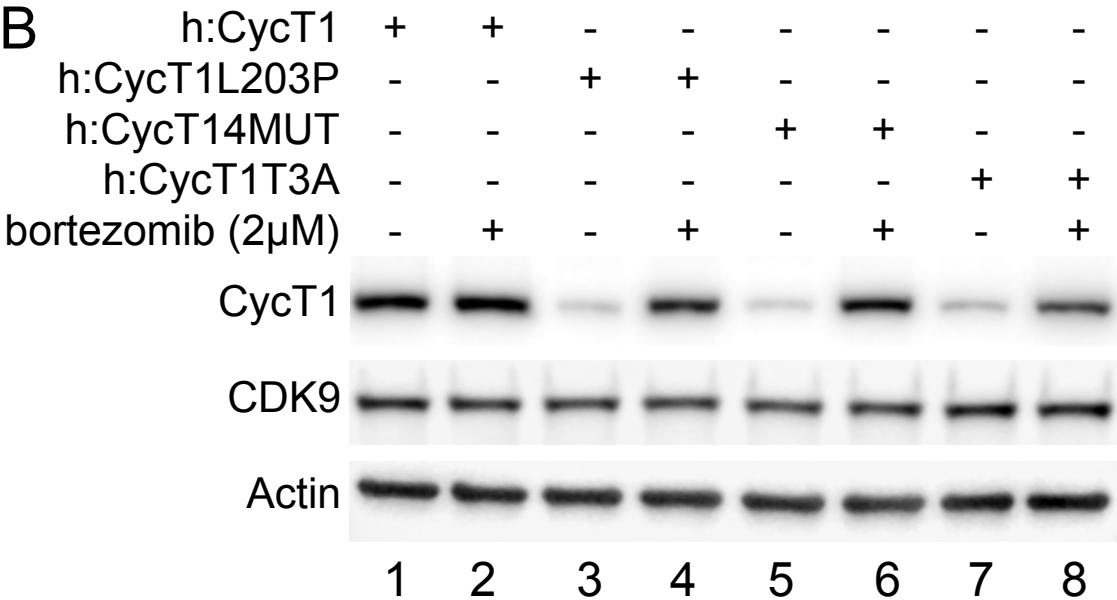

# Source blot for Figure 1C

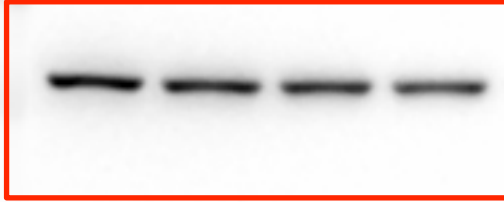

Red marked area was used for the figure.  
Right lanes are the same proteins with different conditions

Source blot for Figure 1C

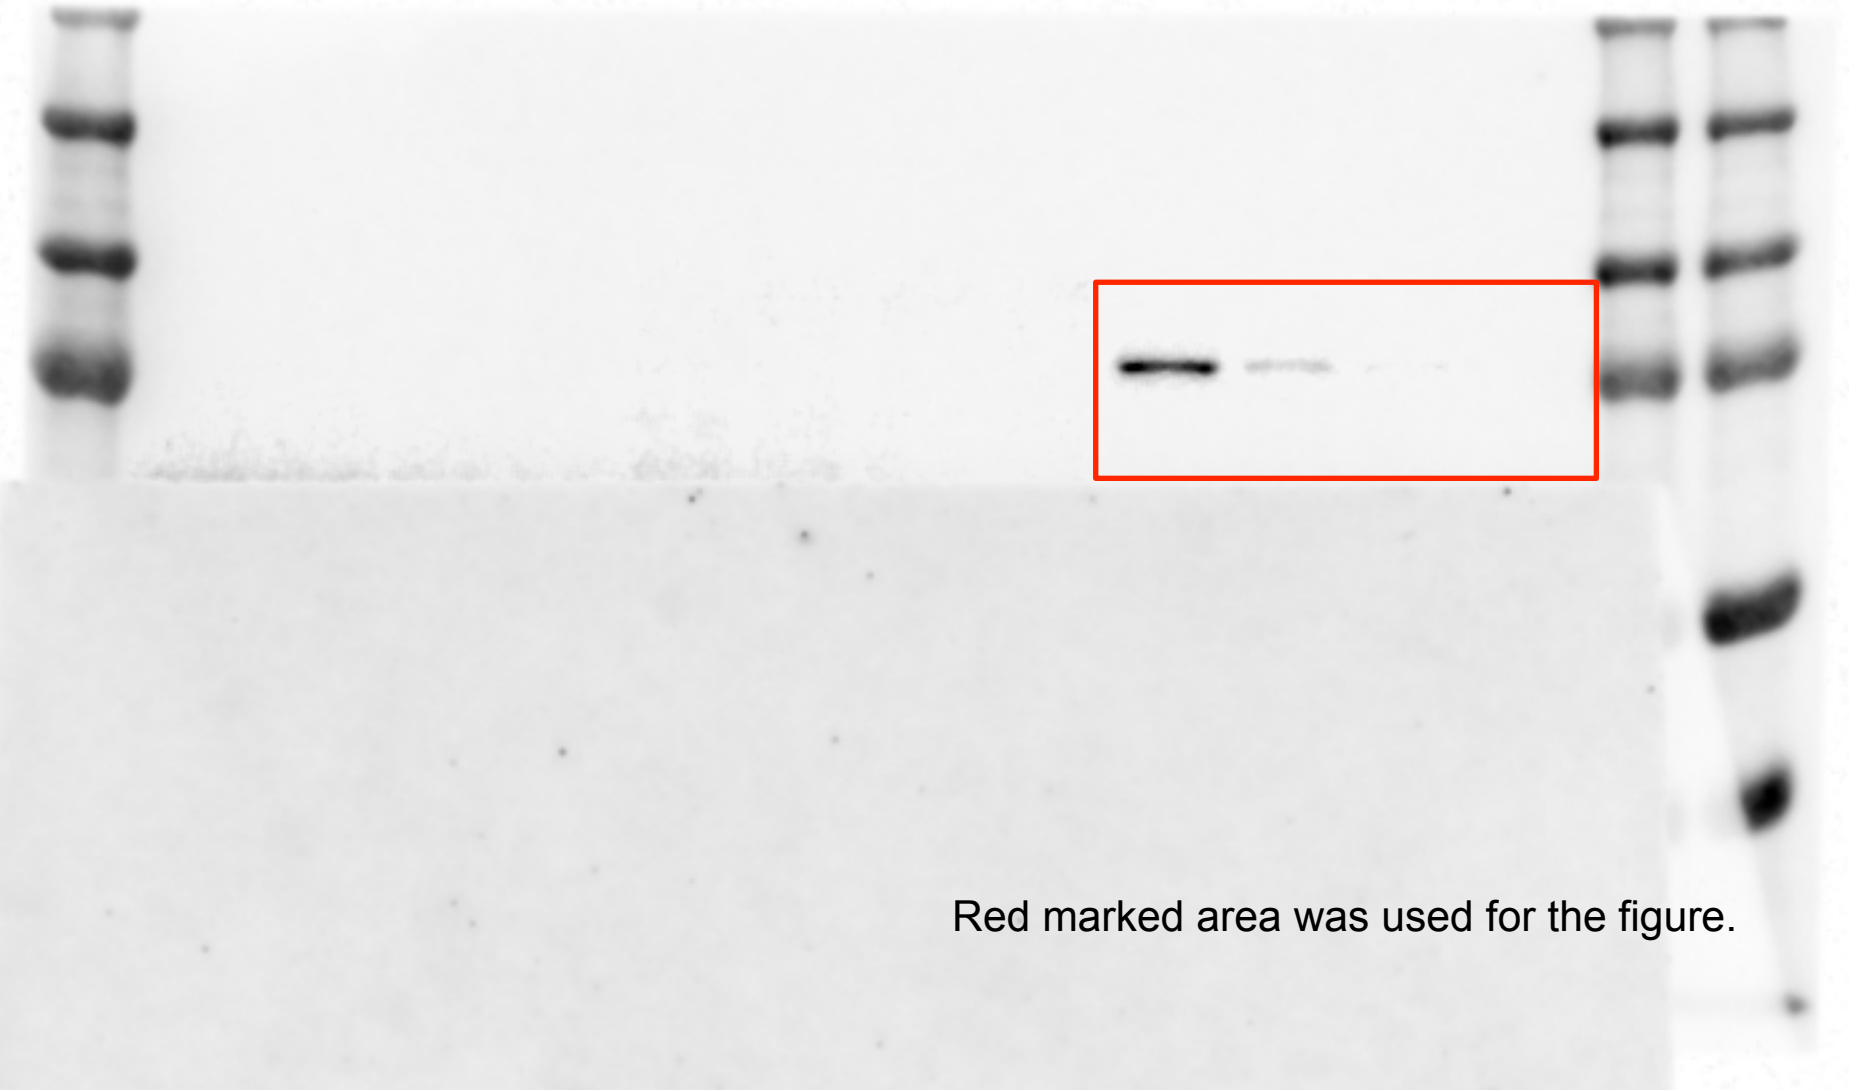

Red marked area was used for the figure.

Source blot for Figure 1C

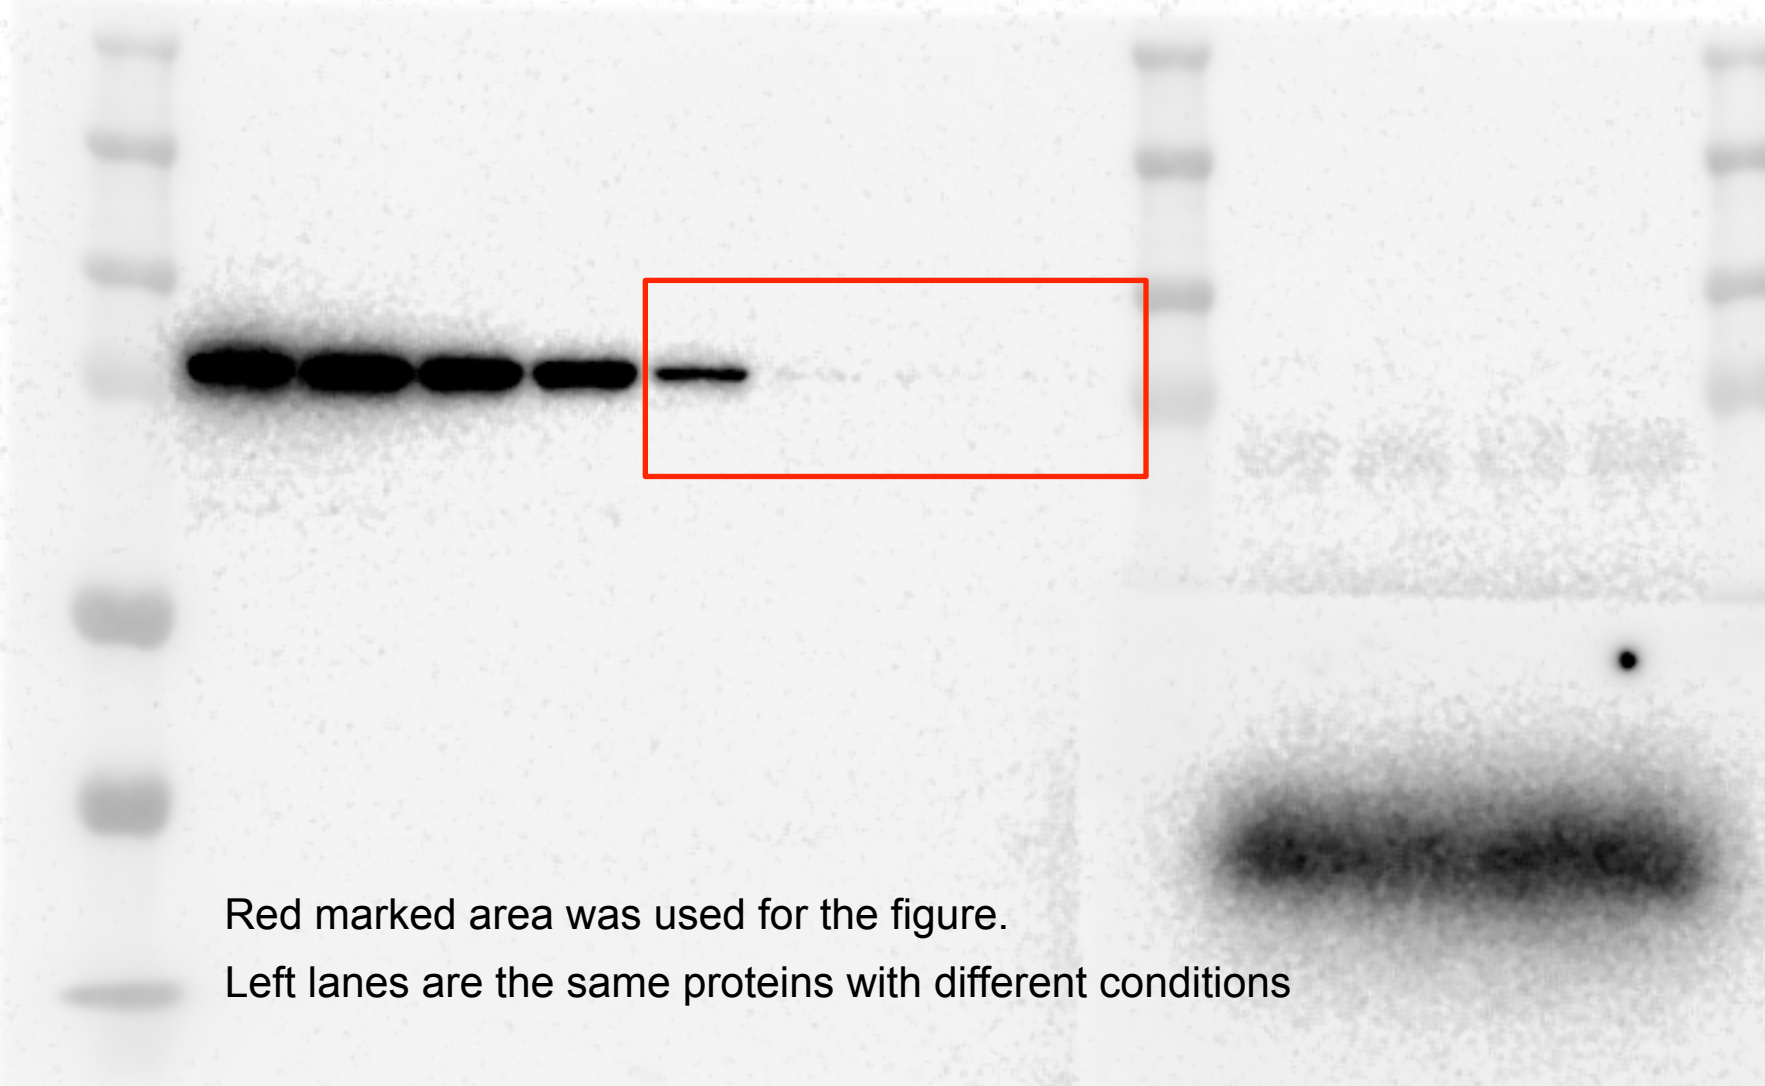

Red marked area was used for the figure.

Left lanes are the same proteins with different conditions

Source blot for Figure 1C

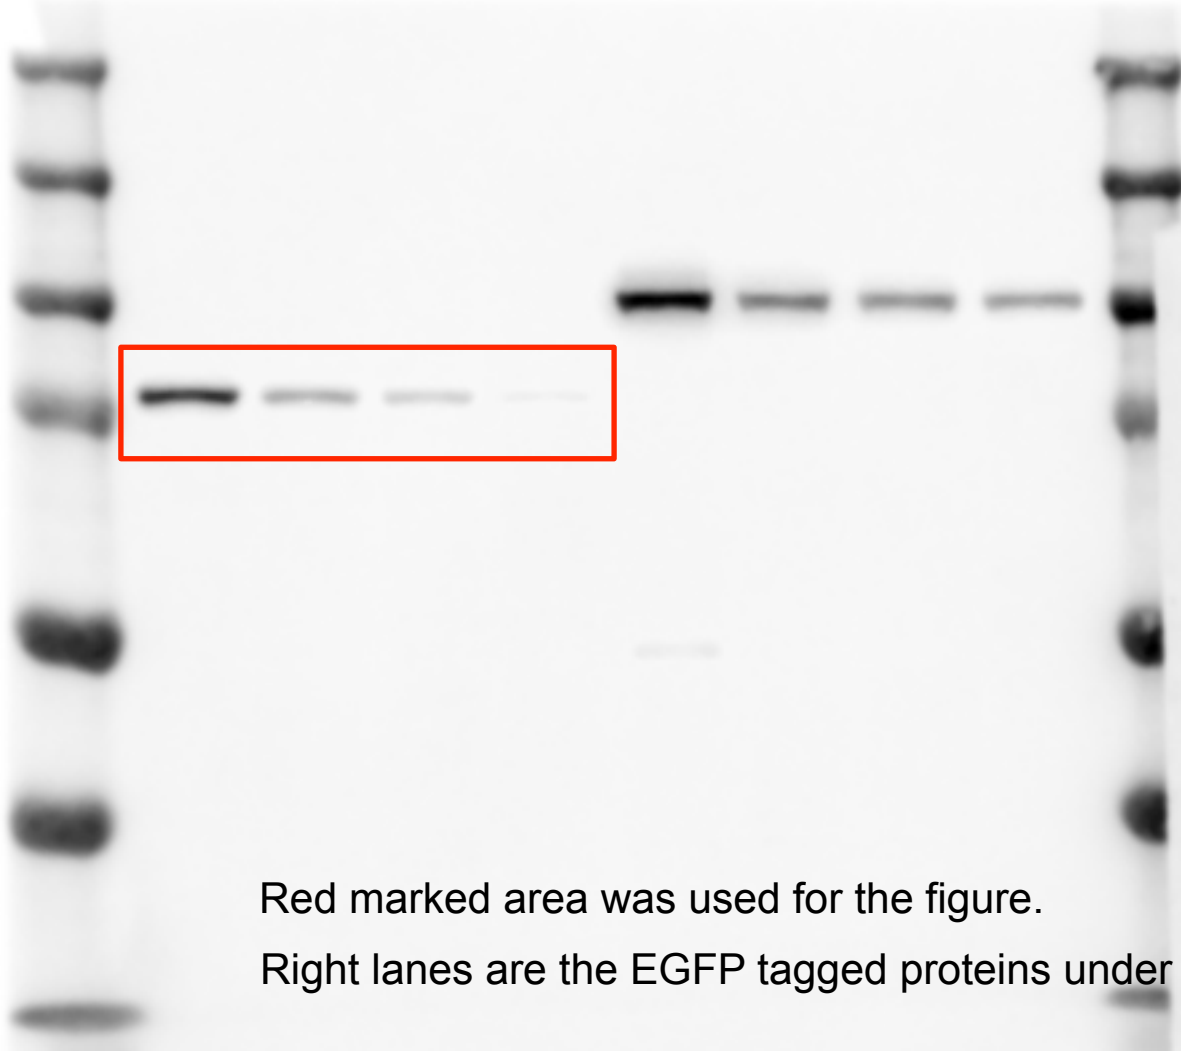

Red marked area was used for the figure.

Right lanes are the EGFP tagged proteins under same conditions

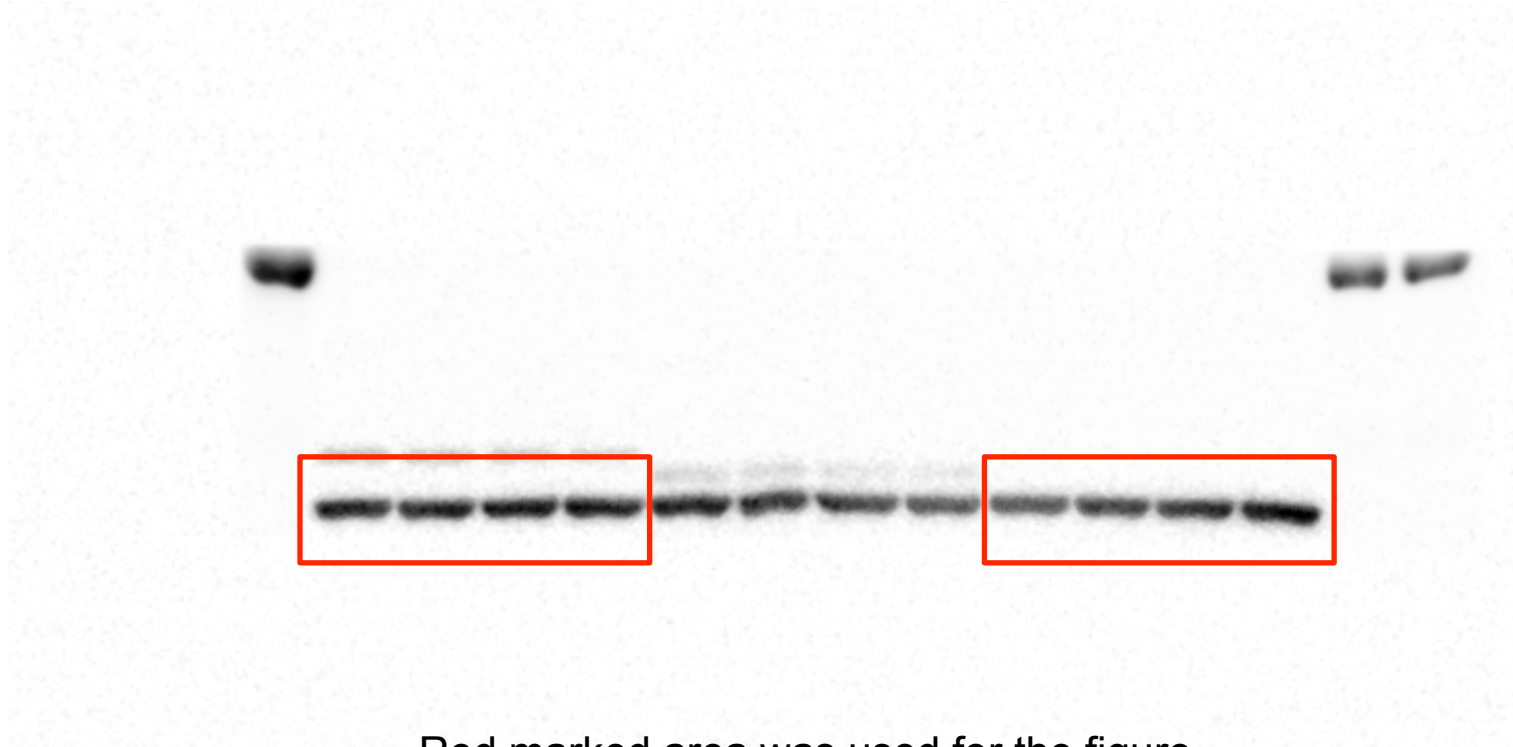

Red marked area was used for the figure.

Middle lanes are the same proteins with different conditions

Membrane was cut after transfer, and before probing by Ab

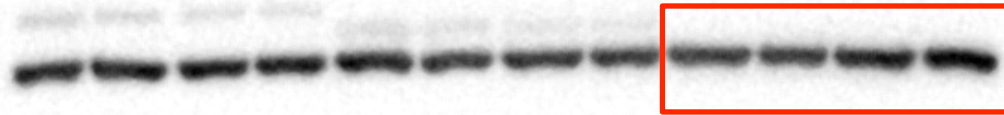

Red marked area was used for the figure.

Left lanes are the same proteins with different conditions

Membrane was cut after transfer, and before probing by Ab

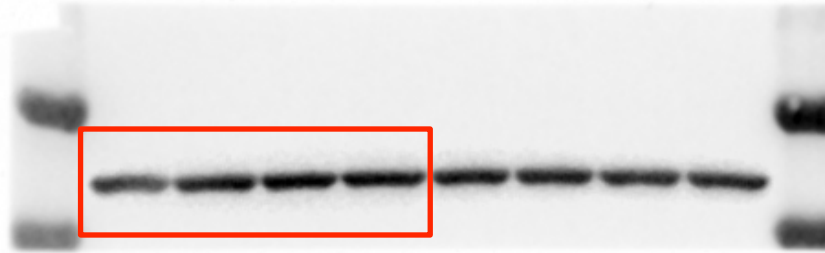

Red marked area was used for the figure.

Right lanes are the same proteins with different conditions

Membrane was cut after transfer, and before probing by Ab

Fig. 1. Critical residues in CycT1 (Thr143 and Thr149) are required for its binding to CDK9

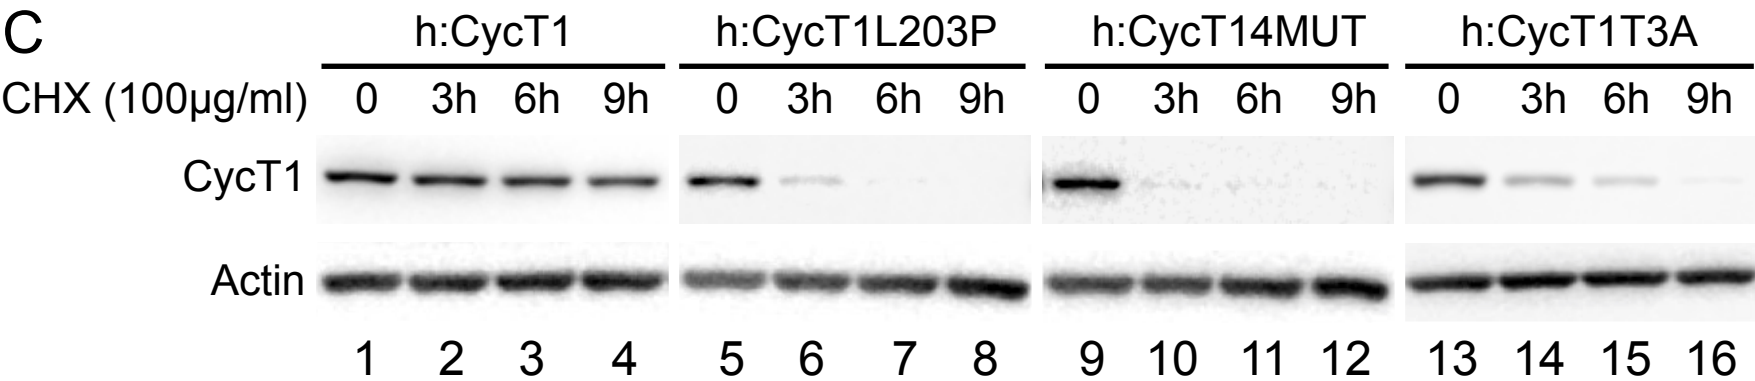

Source blot for Figure 1D

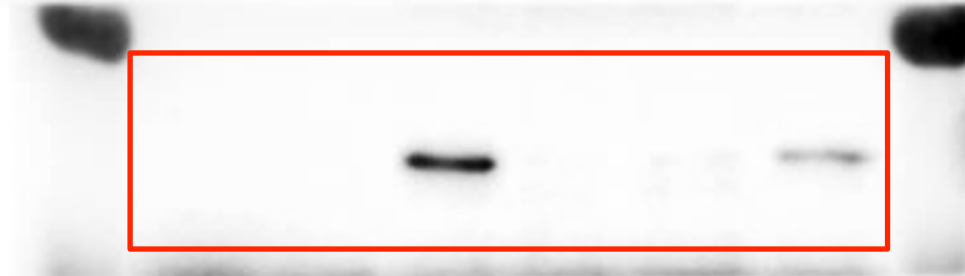

Red marked area was used for the figure.

## Source blot for Figure 1D

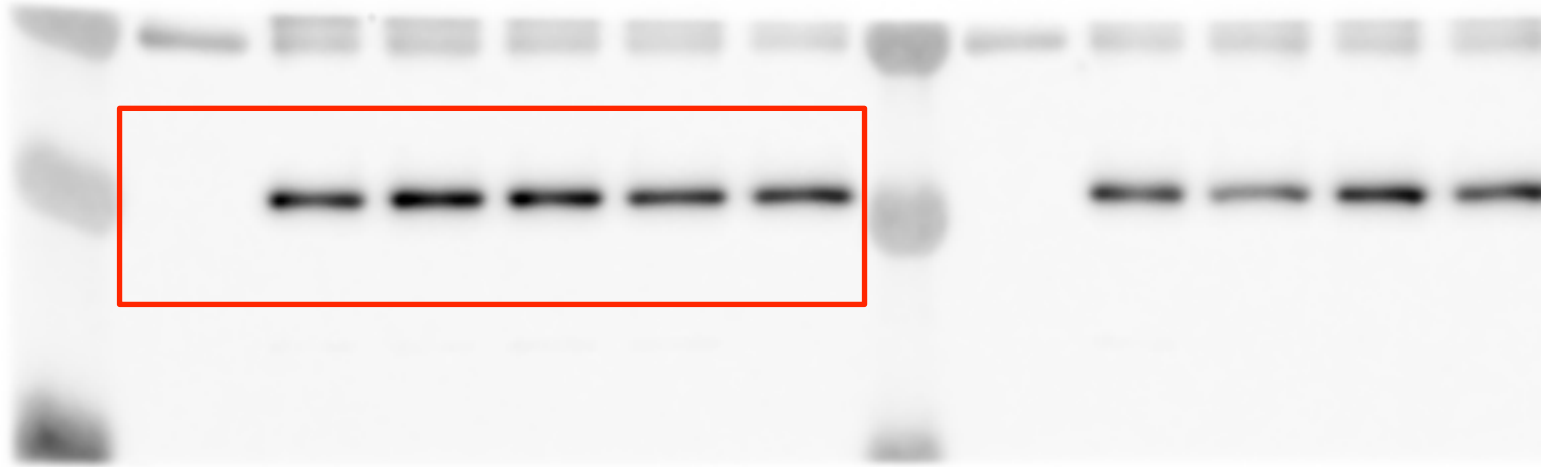

Red marked area was used for the figure.

Membrane was cut after transfer, and before probing by Ab  
Right lanes are the same proteins under different conditions

## Source blot for Figure 1D

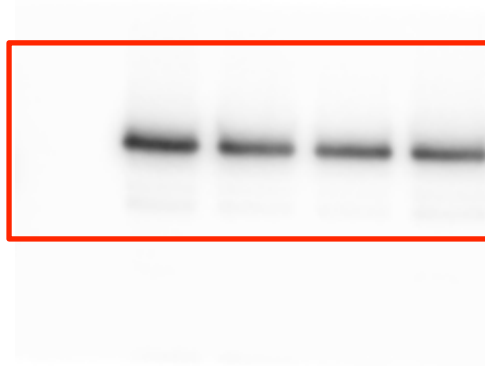

Red marked area was used for the figure.

Membrane was cut after transfer, and before probing by Ab

Source blot for Figure 1D

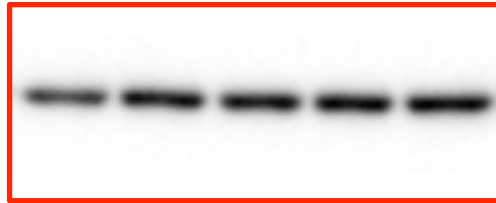

Red marked area was used for the figure.

Membrane was cut after transfer, and before probing by Ab

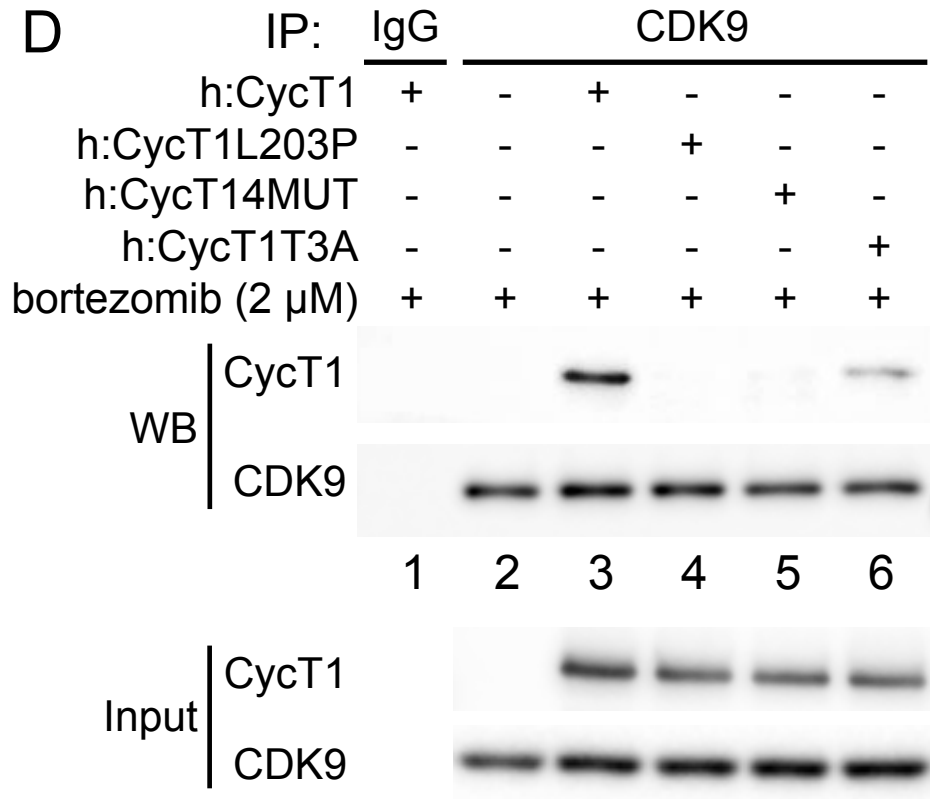

# Source blot for Figure 1E

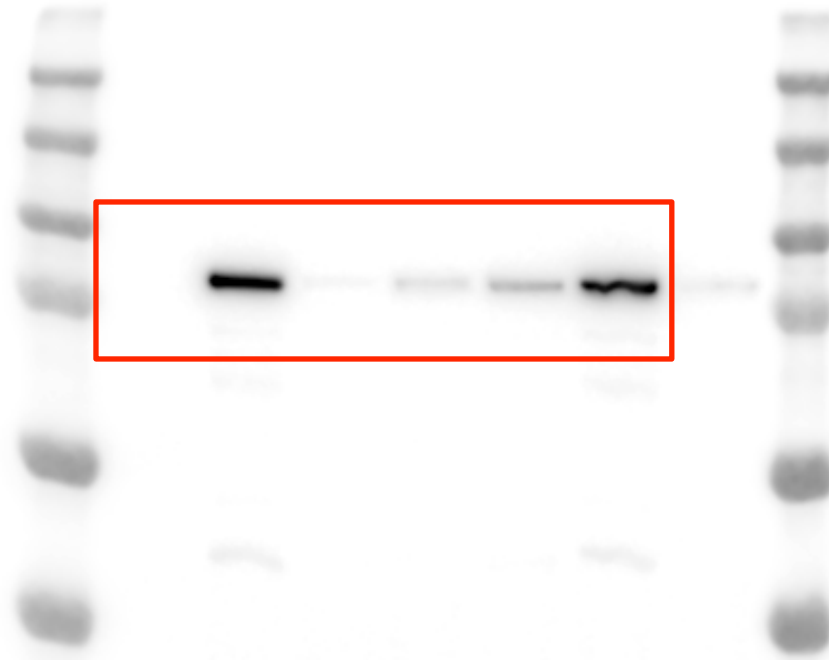

Red marked area was used for the figure.

Right lane are the same protein for the control, CycT1TT143149AA

Source blot for Figure 1E

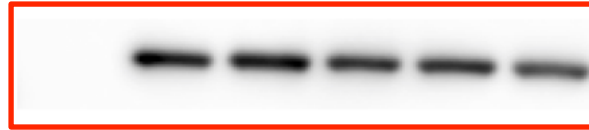

Red marked area was used for the figure.

Membrane was cut after transfer, and before probing by Ab

## Source blot for Figure 1E

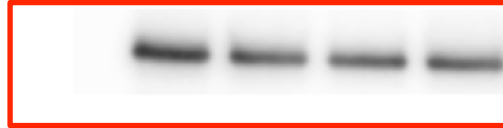

Red marked area was used for the figure.

Membrane was cut after transfer, and before probing by Ab

## Source blot for Figure 1E

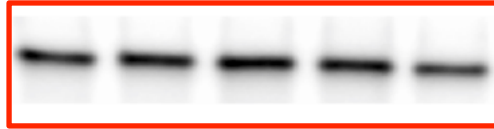

Red marked area was used for the figure.  
Membrane was cut after transfer, and before probing by Ab

Fig. 1. Critical residues in CycT1 (Thr143 and Thr149) are required for its binding to CDK9

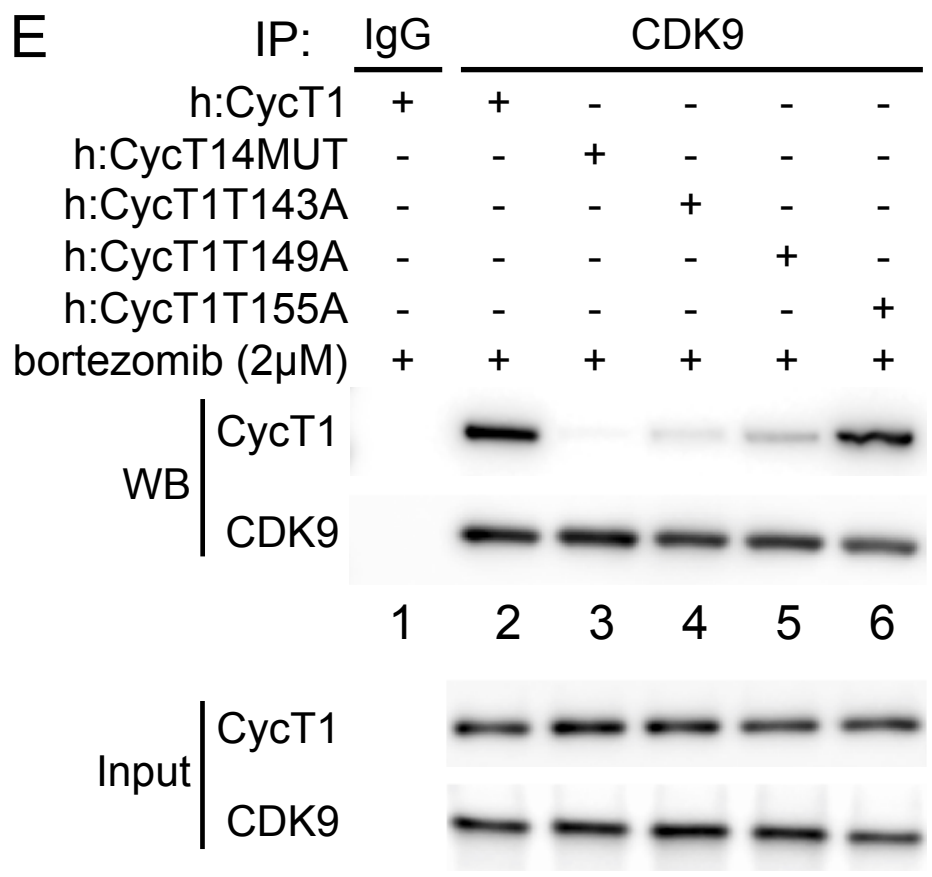

## Source blot for Figure 1F

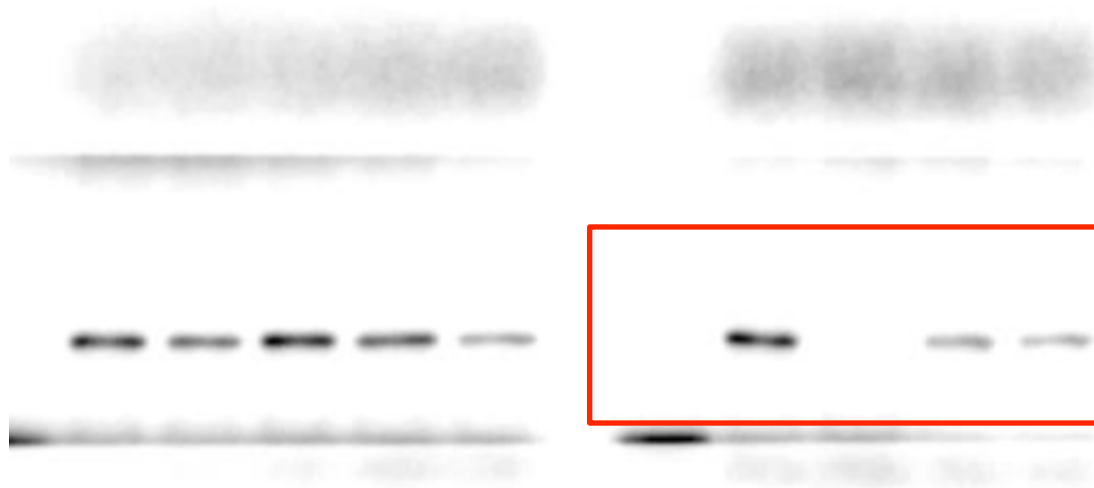

Red marked area was used for the figure.

Left lanes are same proteins for other conditions

## Source blot for Figure 1F

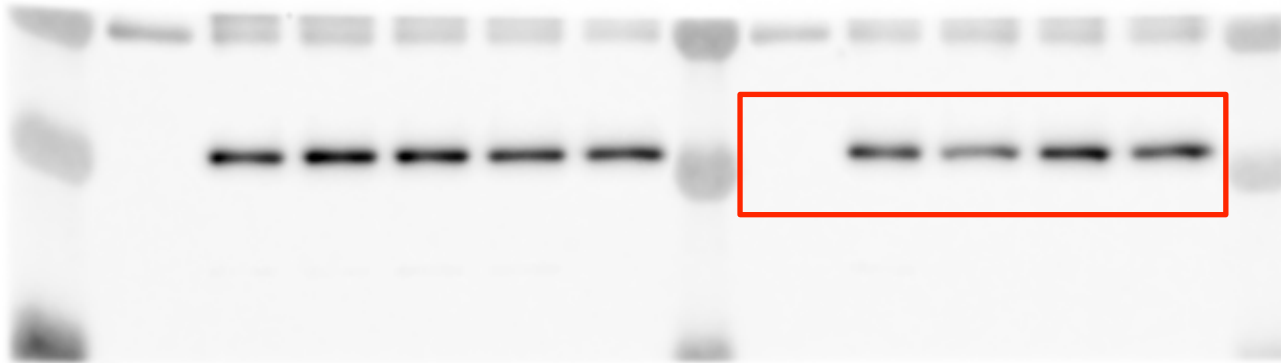

Red marked area was used for the figure.

Membrane was cut after transfer, and before probing by Ab

Left lanes are same proteins for other conditions

## Source blot for Figure 1F

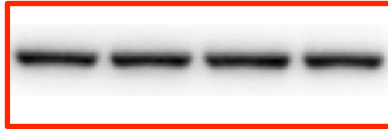

Red marked area was used for the figure.

Membrane was cut after transfer, and before probing by Ab

## Source blot for Figure 1F

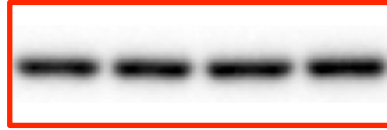

Red marked area was used for the figure.

Membrane was cut after transfer, and before probing by Ab

Fig. 1. Critical residues in CycT1 (Thr143 and Thr149) are required for its binding to CDK9

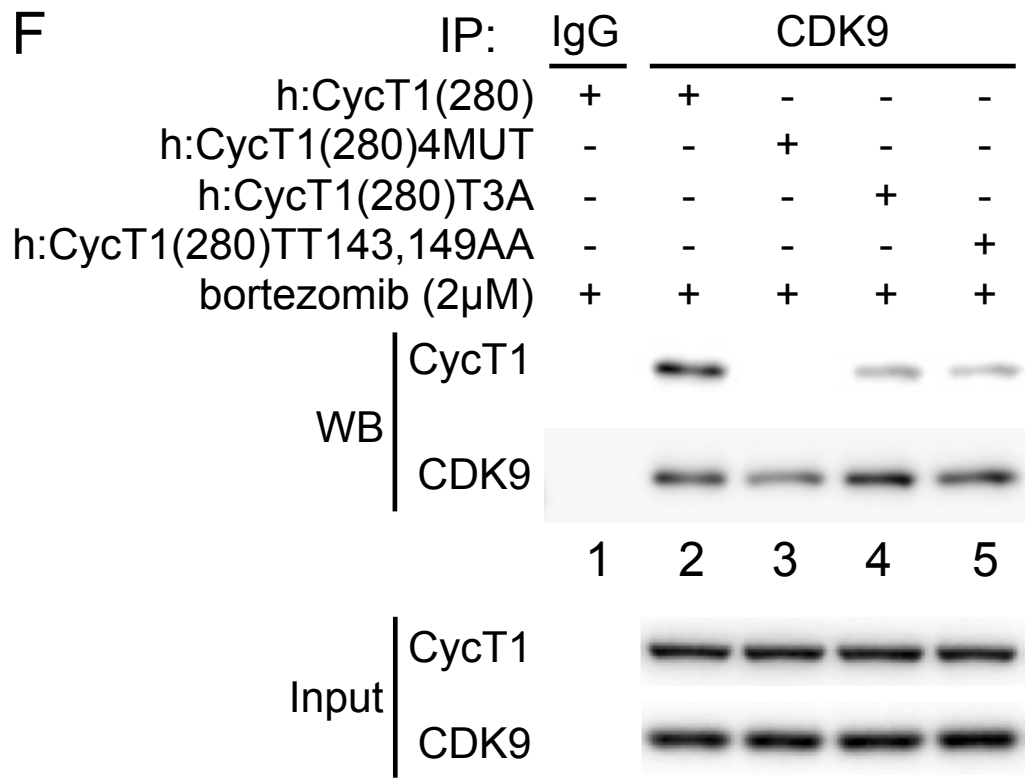

## Source blot for Figure 2A

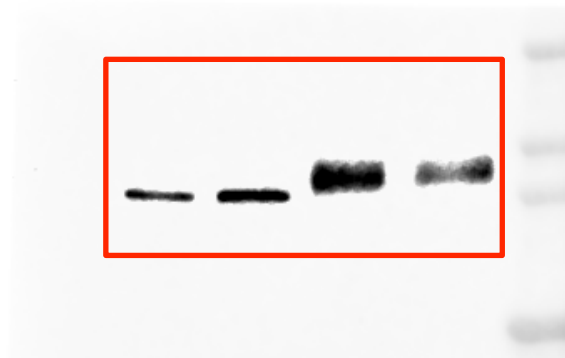

Red marked area was used for the figure.

Membrane was cut after transfer, and before probing by Ab

## Source blot for Figure 2A

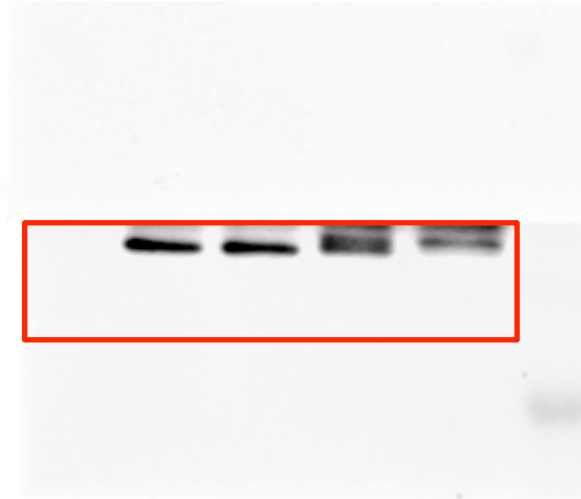

Red marked area was used for the figure.

Membrane was cut after transfer, and before probing by Ab

## Source blot for Figure 2A

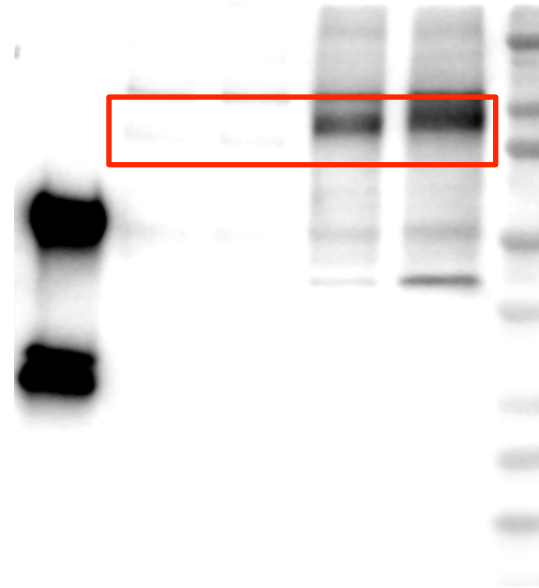

Red marked area was used for the figure.

Membrane was cut after transfer, and before probing by Ab

## Source blot for Figure 2A

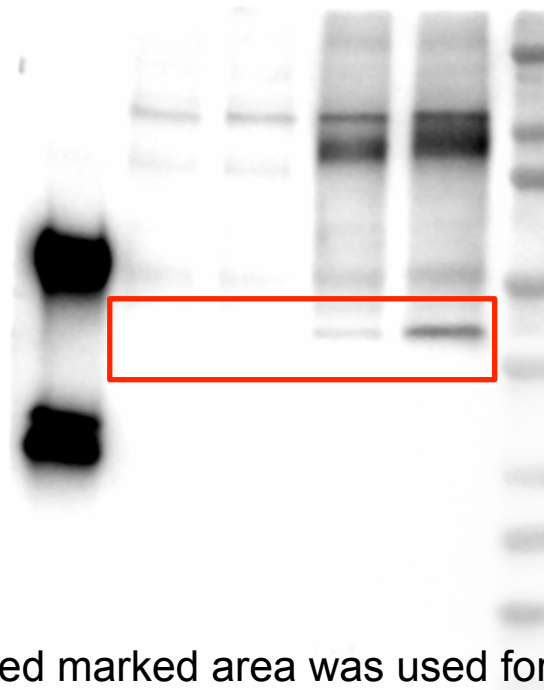

Red marked area was used for the figure.

Membrane was cut after transfer, and before probing by Ab

## Source blot for Figure 2A

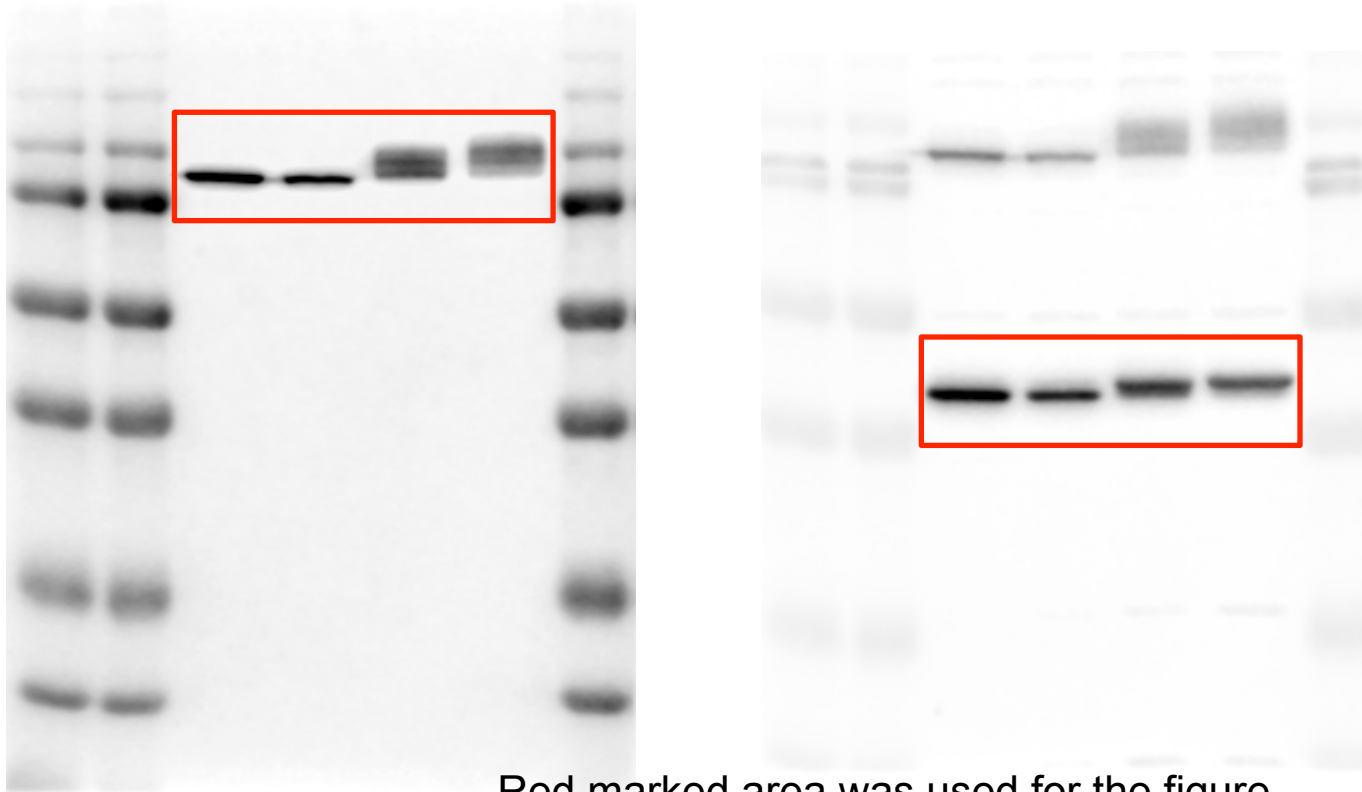

Red marked area was used for the figure.

Membrane was cut after transfer, and before probing by Ab

Two input proteins blots are in the same slide

Fig. 2. Phosphorylation of Thr143 and Thr149 in CycT1 contributes to its binding to CDK9

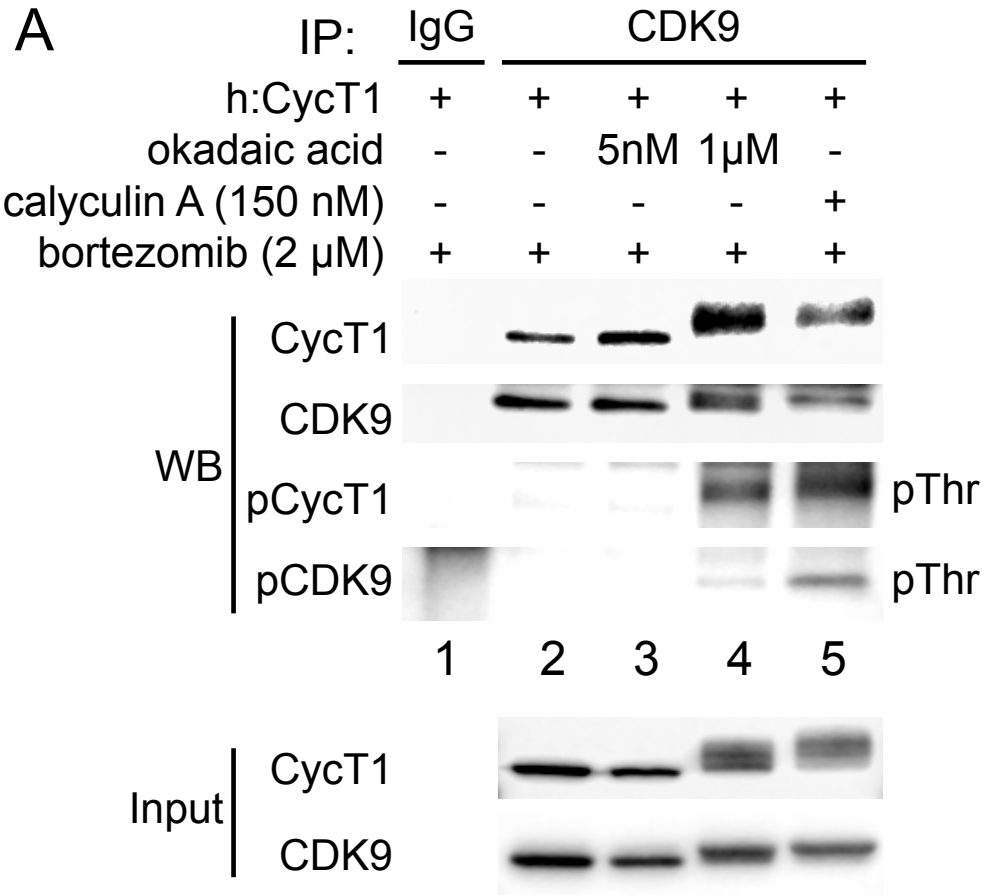

## Source blot for Figure 2B

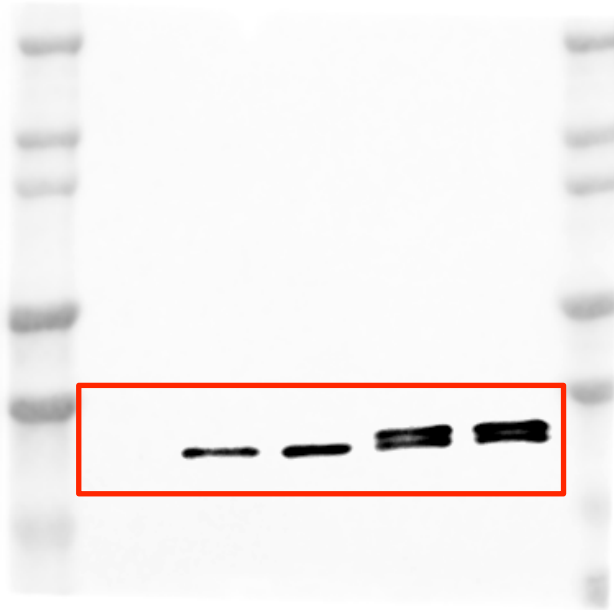

Red marked area was used for the figure.

Membrane was cut after transfer, and before probing by Ab

## Source blot for Figure 2B

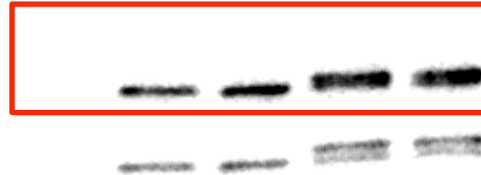

Red marked area was used for the figure.

Membrane was cut after transfer, and before probing by Ab

## Source blot for Figure 2B

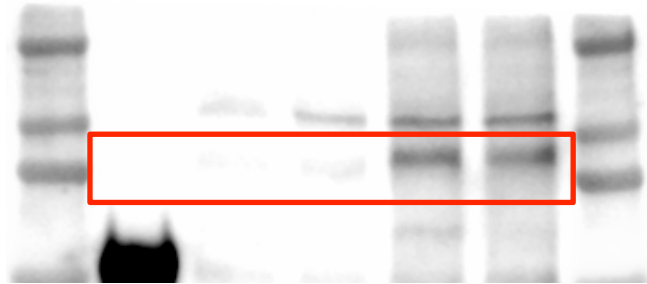

Red marked area was used for the figure.

Membrane was cut after transfer, and before probing by Ab

## Source blot for Figure 2B

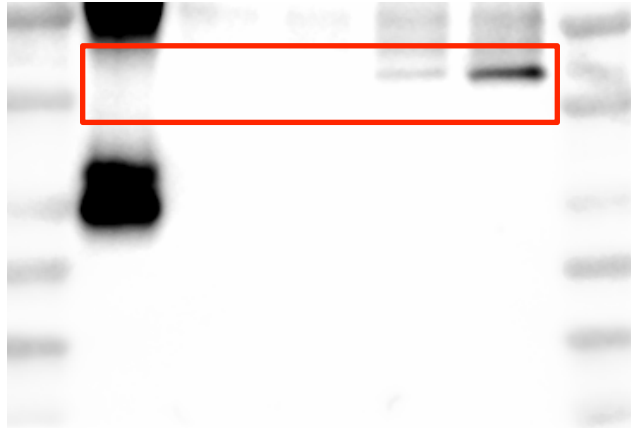

Red marked area was used for the figure.

Membrane was cut after transfer, and before probing by Ab

## Source blot for Figure 2B

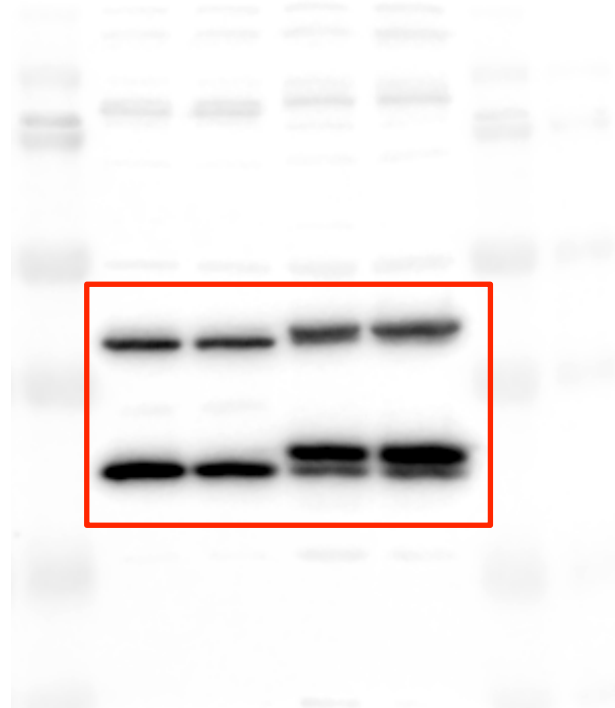

Red marked area was used for the figure.

Membrane was cut after transfer, and before probing by Ab  
Two antibodies are used in the same time for input proteins

Fig. 2. Phosphorylation of Thr143 and Thr149 in CycT1 contributes to its binding to CDK9

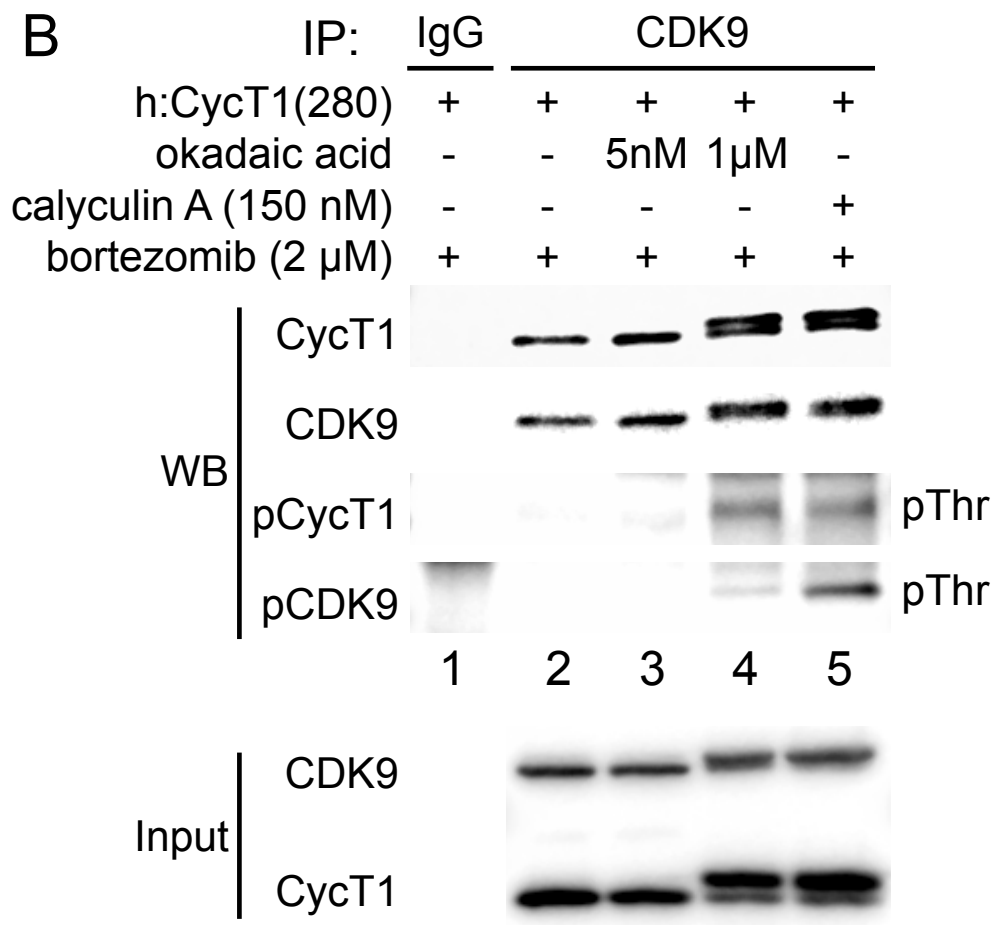

Source blot for Figure 2C

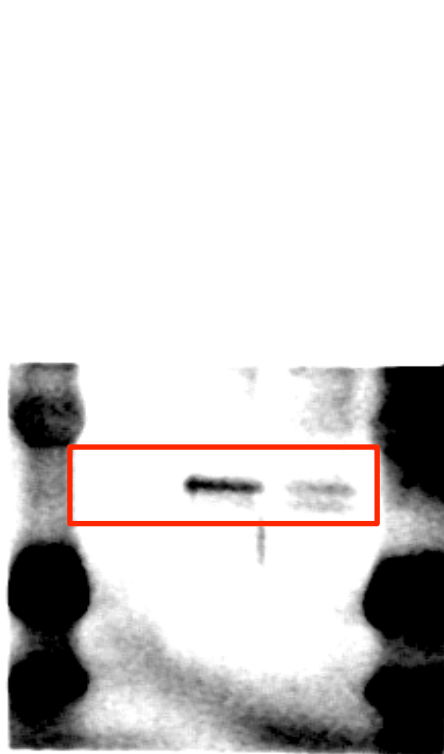

Red marked area was used for the figure.

## Source blot for Figure 2C

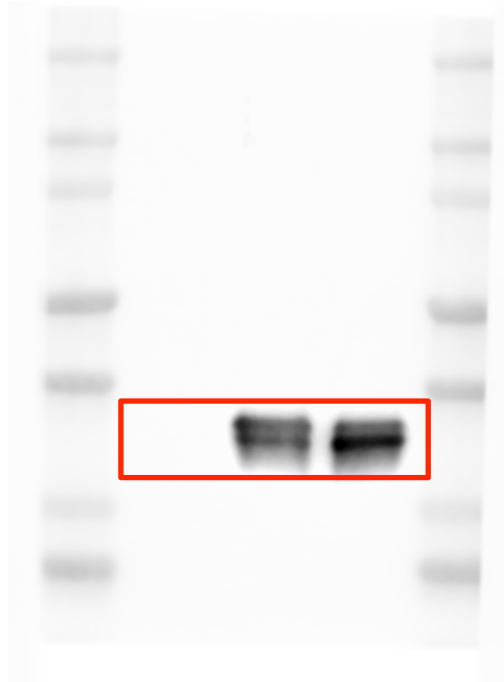

Red marked area was used for the figure.

## Source blot for Figure 2C

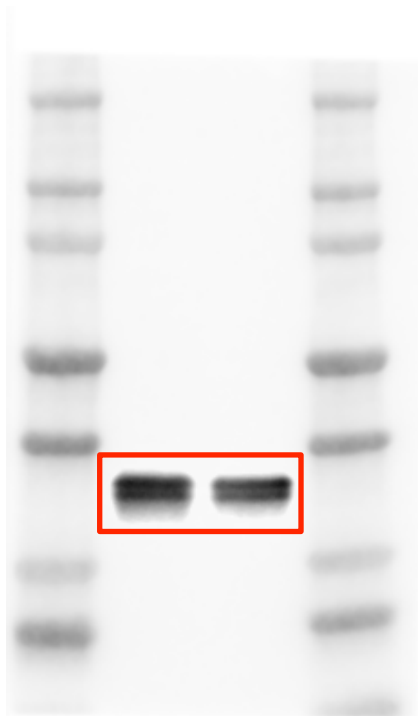

Red marked area was used for the figure.

Fig. 2. Phosphorylation of Thr143 and Thr149 in CycT1 contributes to its binding to CDK9

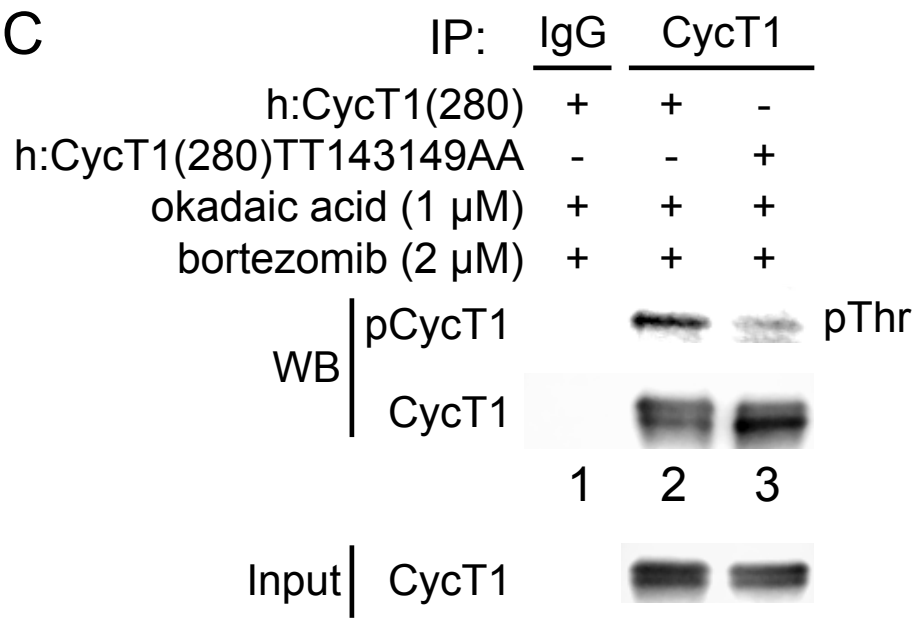

## Source gel-staining for Figure 2D

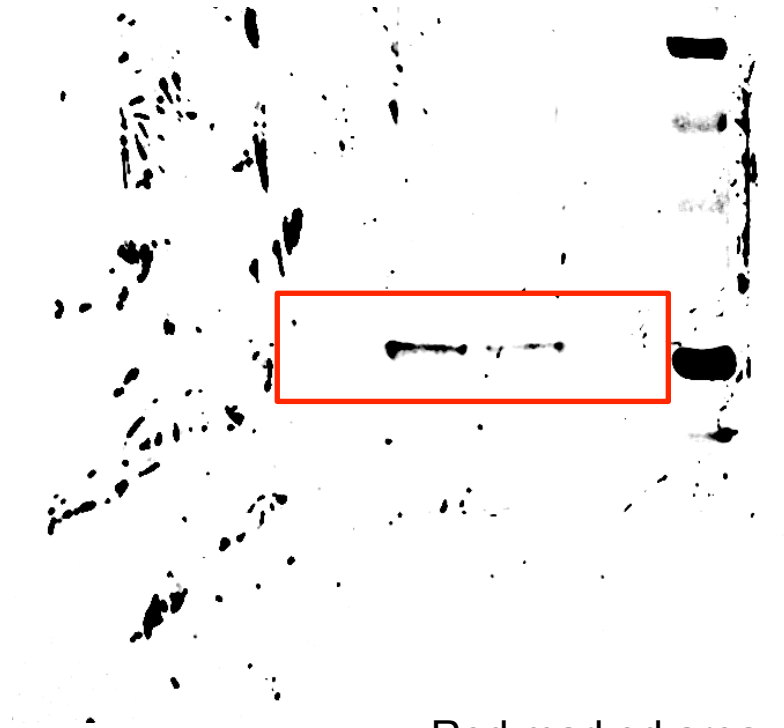

Red marked area was used for the figure.

Fig. 2. Phosphorylation of Thr143 and Thr149 in CycT1 contributes to its binding to CDK9

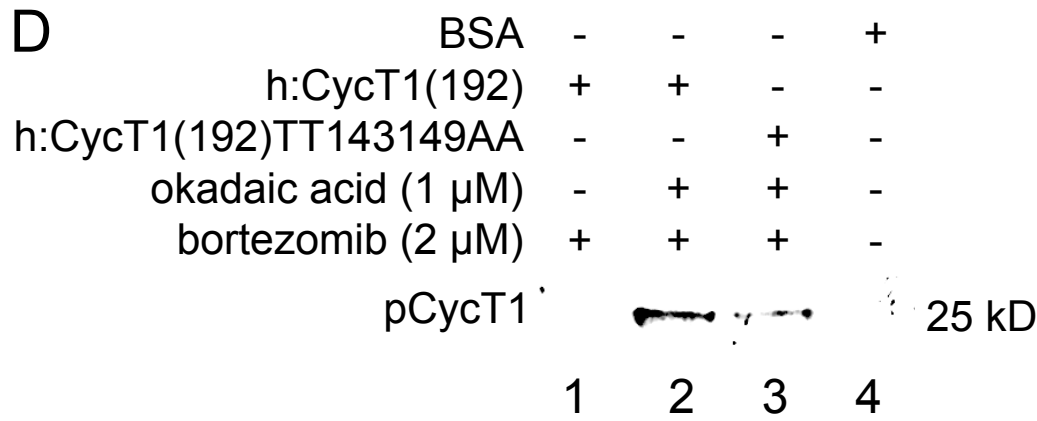

Source gel staining for Figure 2E

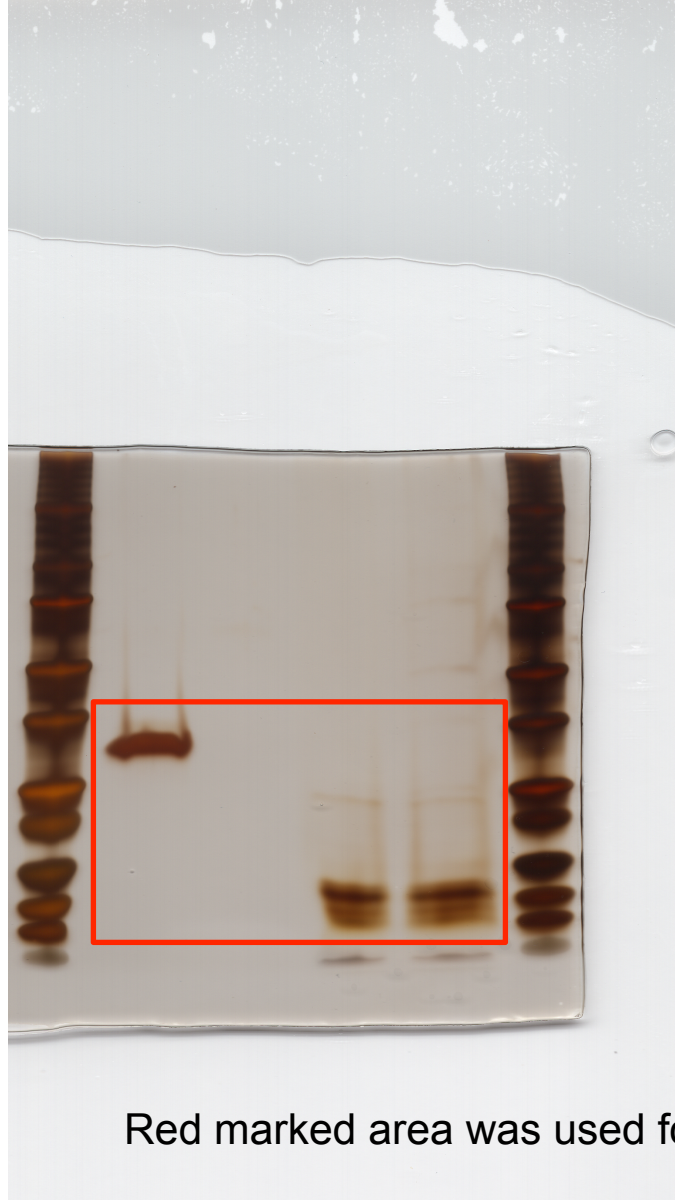

Red marked area was used for the figure.

Fig. 2. Phosphorylation of Thr143 and Thr149 in CycT1 contributes to its binding to CDK9

E

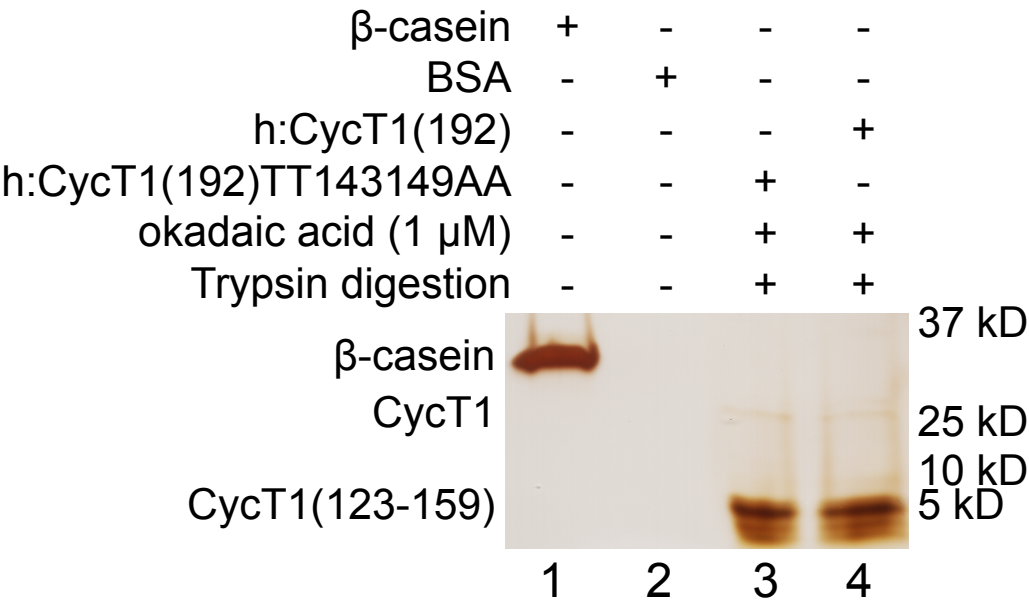

## Source gel staining for Figure 2E

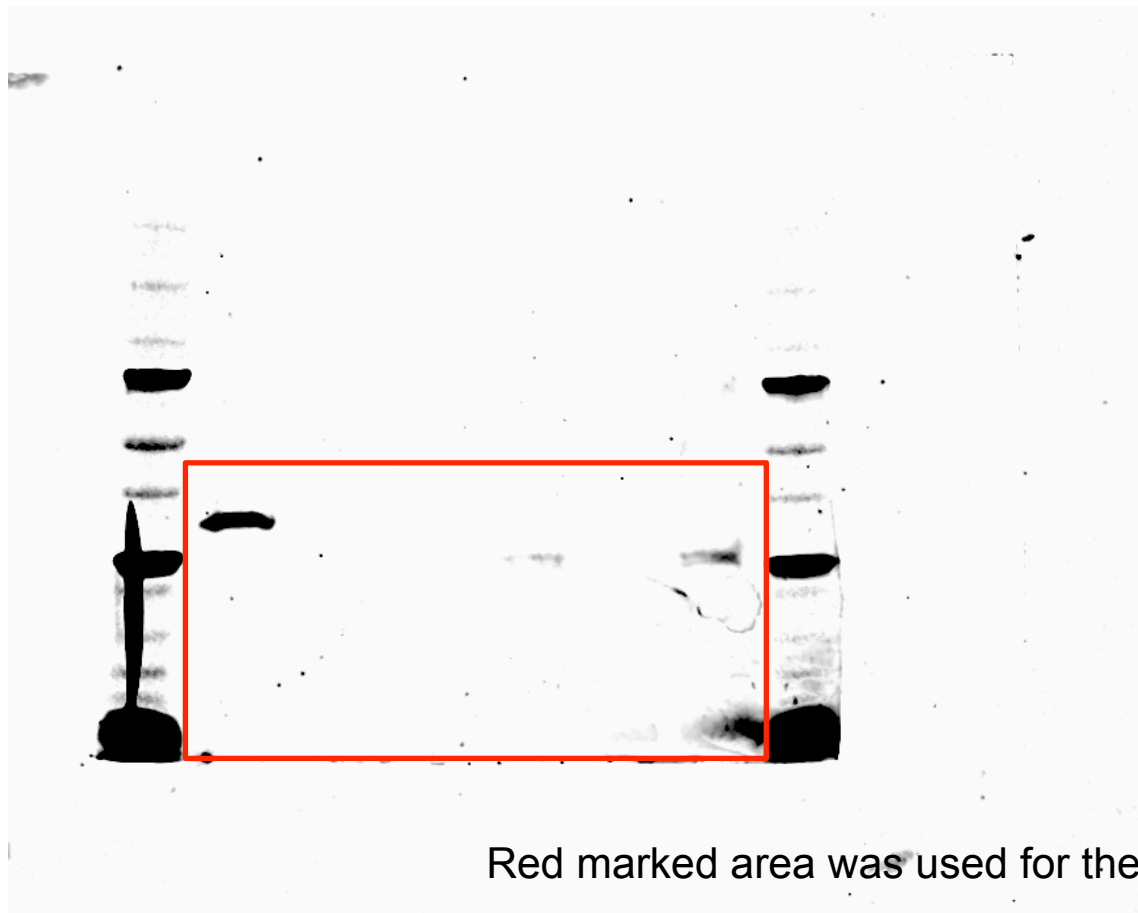

Fig. 2. Phosphorylation of Thr143 and Thr149 in CycT1 contributes to its binding to CDK9

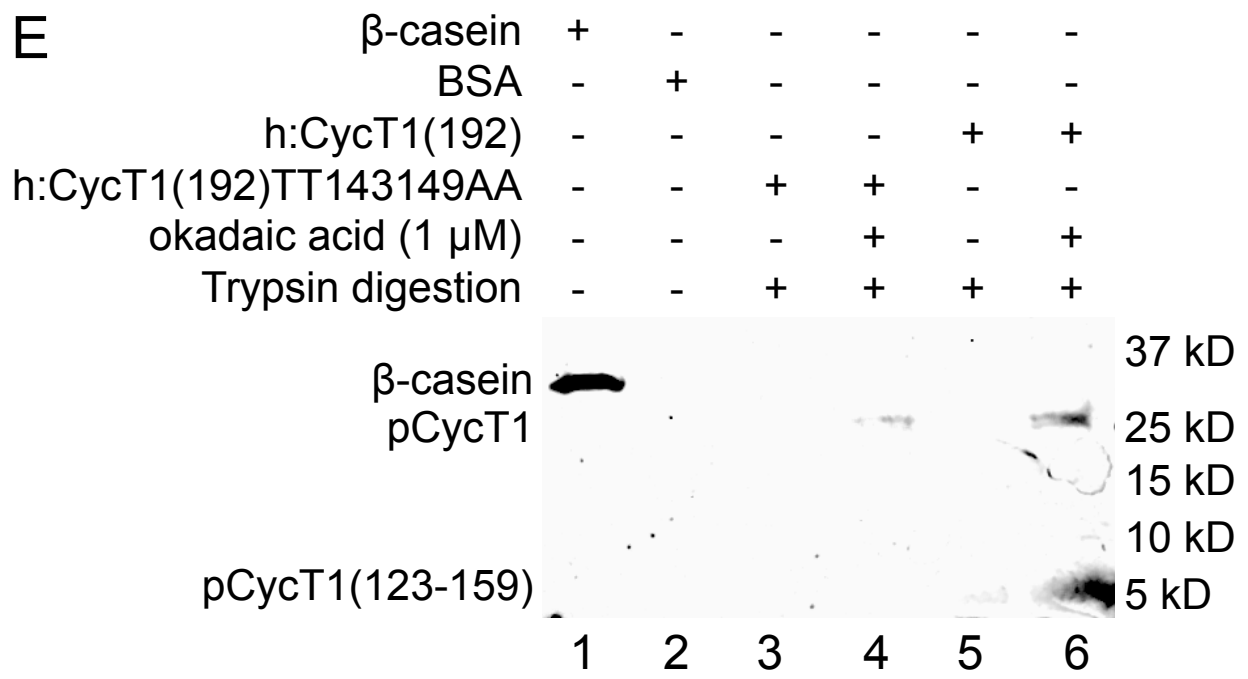

Fig.3. Phosphorylation of Thr143 and Thr149 stabilizes the interface between CycT1 and CDK9

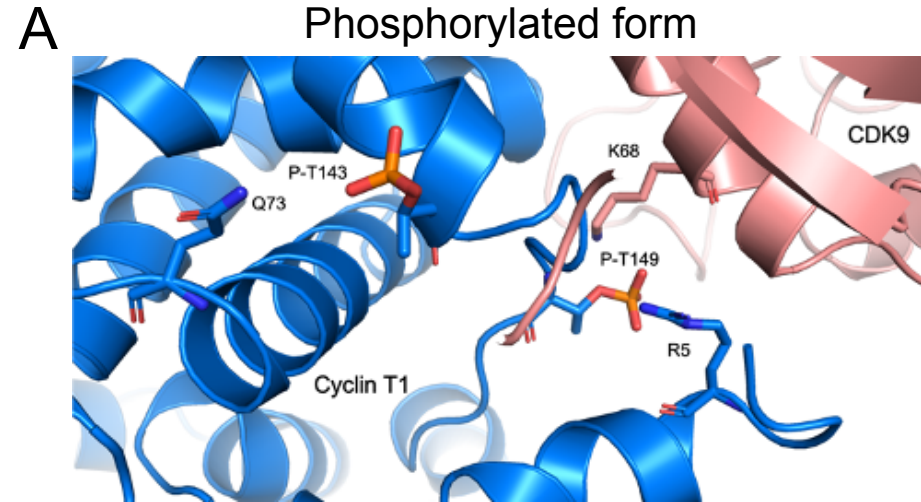

# Source blot for Figure 3B

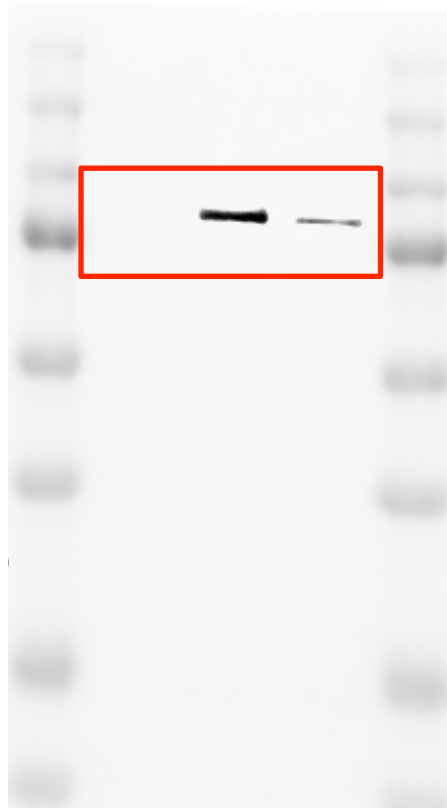

Red marked area was used for the figure.

## Source blot for Figure 3B

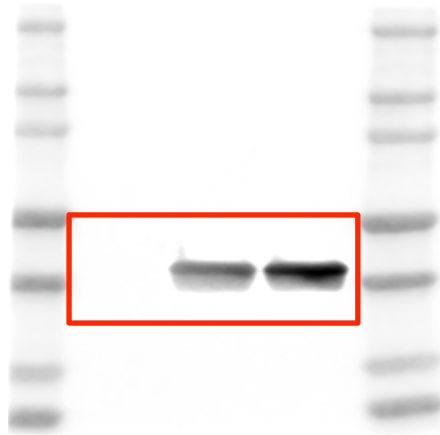

Red marked area was used for the figure.

Membrane was cut after transfer, and before probing by Ab

## Source blot for Figure 3B

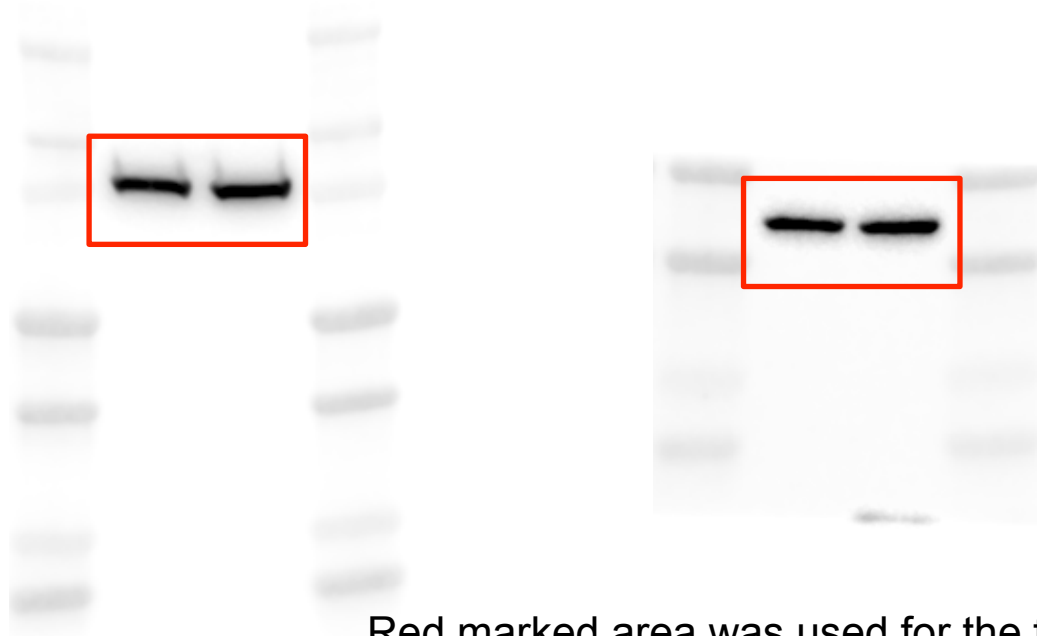

Red marked area was used for the figure.

Membrane was cut after transfer, and before probing by Ab  
Two input proteins bolts are in the slide

Fig.3. Phosphorylation of Thr143 and Thr149 stabilizes the interface between CycT1 and CDK9

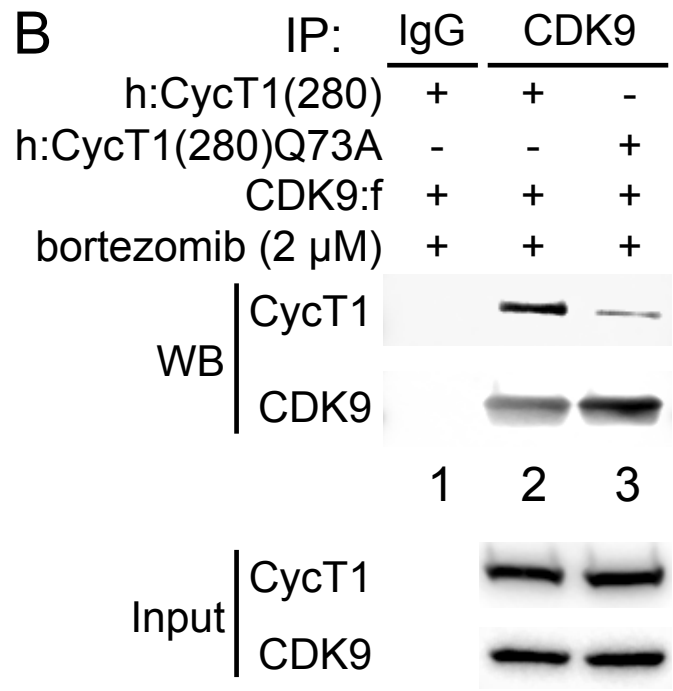

## Source blot for Figure 3C

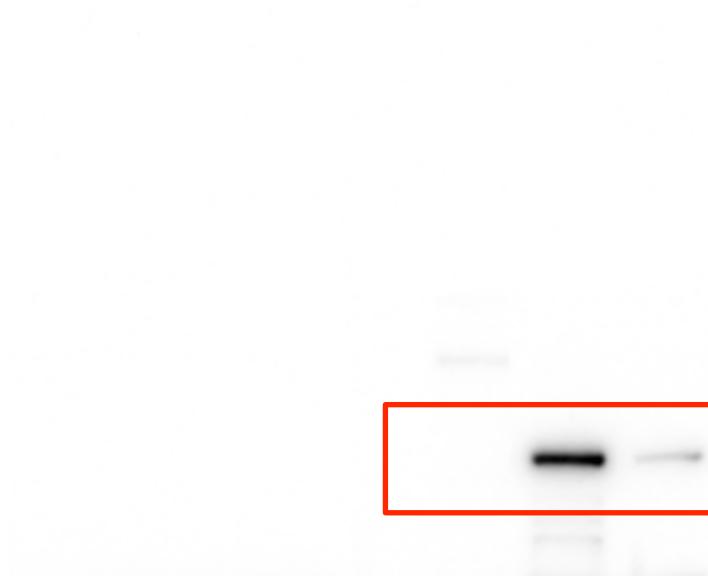

Red marked area was used for the figure.

Membrane was cut after transfer, and before probing by Ab

## Source blot for Figure 3C

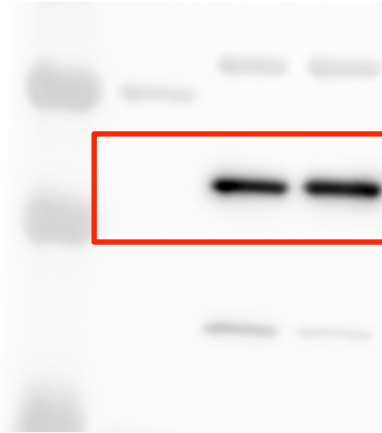

Red marked area was used for the figure.

Membrane was cut after transfer, and before probing by Ab

## Source blot for Figure 3C

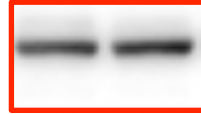

Red marked area was used for the figure.

Membrane was cut after transfer, and before probing by Ab

## Source blot for Figure 3C

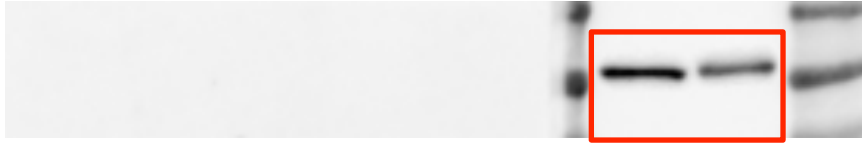

Red marked area was used for the figure.

Membrane was cut after transfer, and before probing by Ab

Fig.3. Phosphorylation of Thr143 and Thr149 stabilizes the interface between CycT1 and CDK9

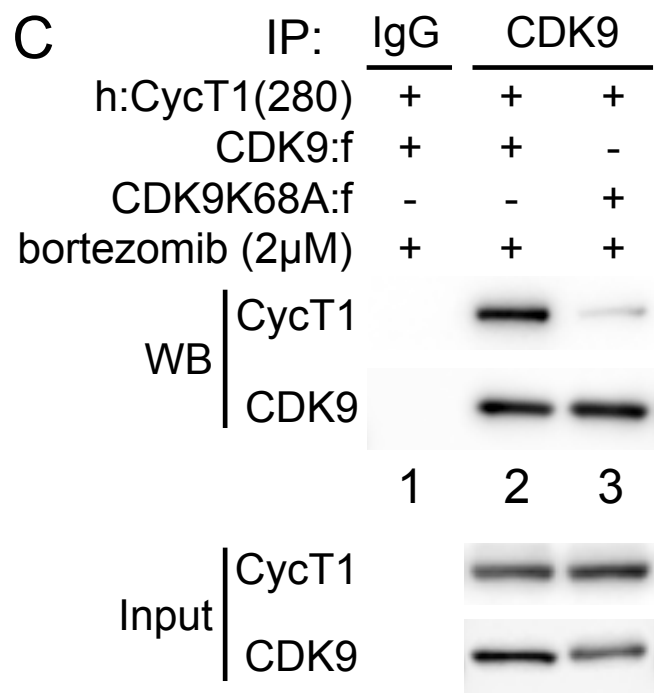

## Source blot for Figure 3D

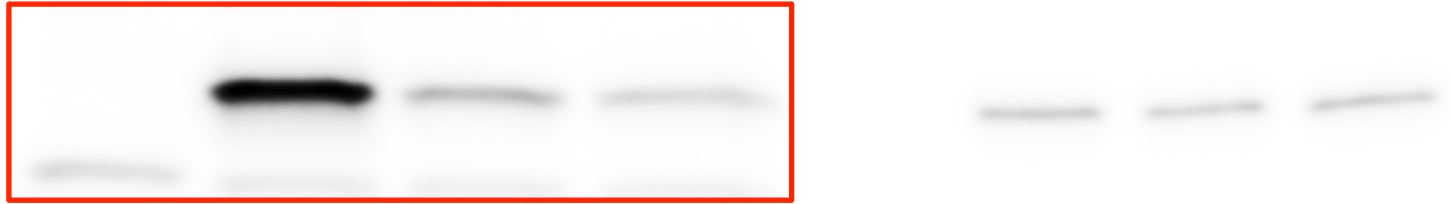

Red marked area was used for the figure.

Membrane was cut after transfer, and before probing by Ab  
Right lanes are the same proteins under different conditions

## Source blot for Figure 3D

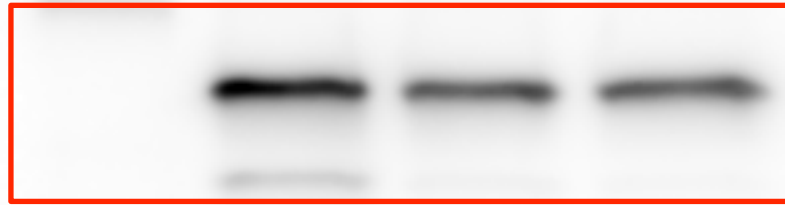

Red marked area was used for the figure.

Membrane was cut after transfer, and before probing by Ab  
Right lanes are the other proteins under different conditions

## Source blot for Figure 3D

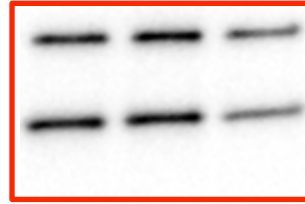

Red marked area was used for the figure.

Membrane was cut after transfer, and before probing by Ab  
Two antibodies are used in the same time for input proteins

Fig.3. Phosphorylation of Thr143 and Thr149 stabilizes the interface between CycT1 and CDK9

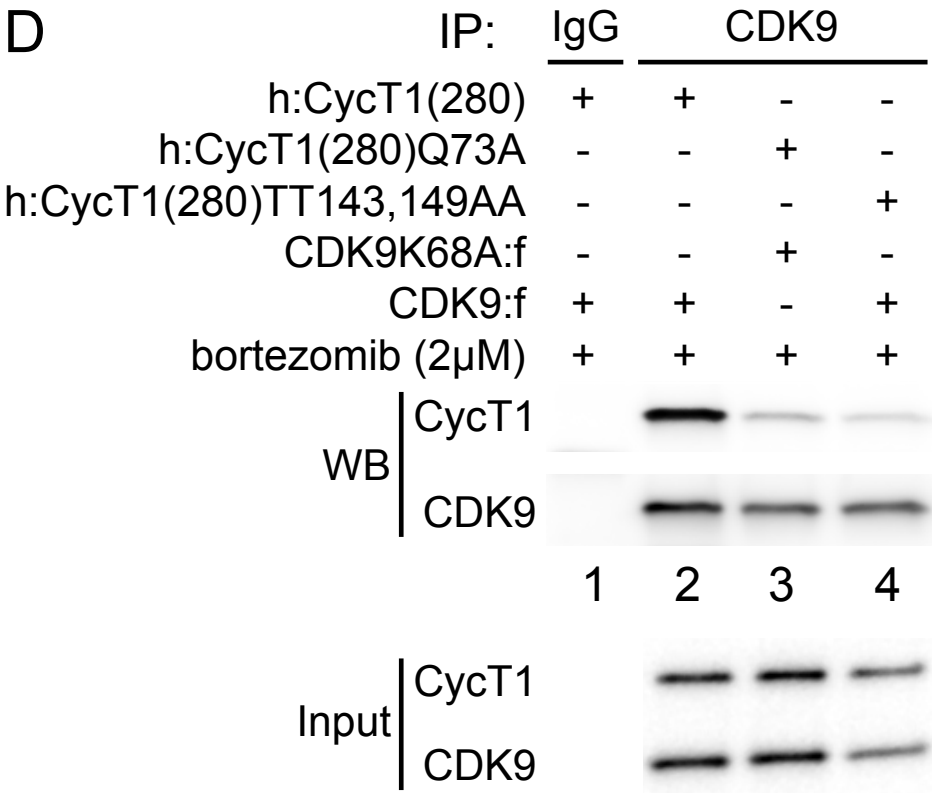

## Source blot for Figure 4A

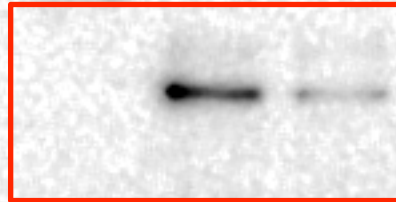

Red marked area was used for the figure.

The beside lane is the same protein with higher concentration of staurosporine

## Source blot for Figure 4A

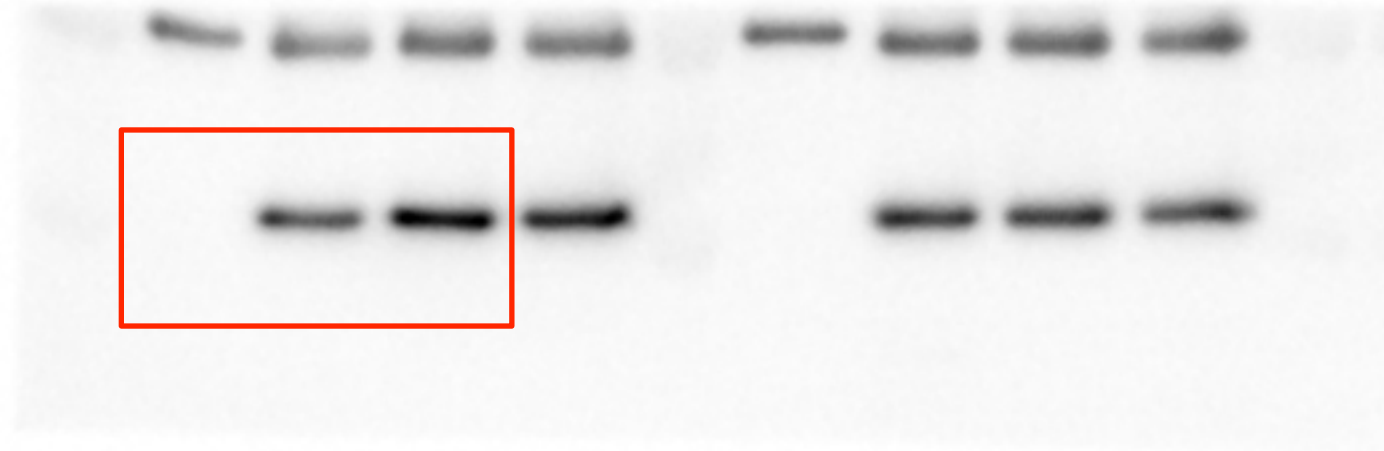

Red marked area was used for the figure.

The beside lane is the same protein with higher concentration of staurosporine  
other lanes are the same protein under different conditions

## Source blot for Figure 4A

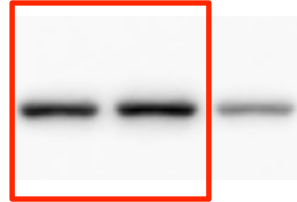

Red marked area was used for the figure.

Membrane was cut after transfer, and before probing by Ab

Right lane is the same protein with higher concentration of staurosporine

## Source blot for Figure 4A

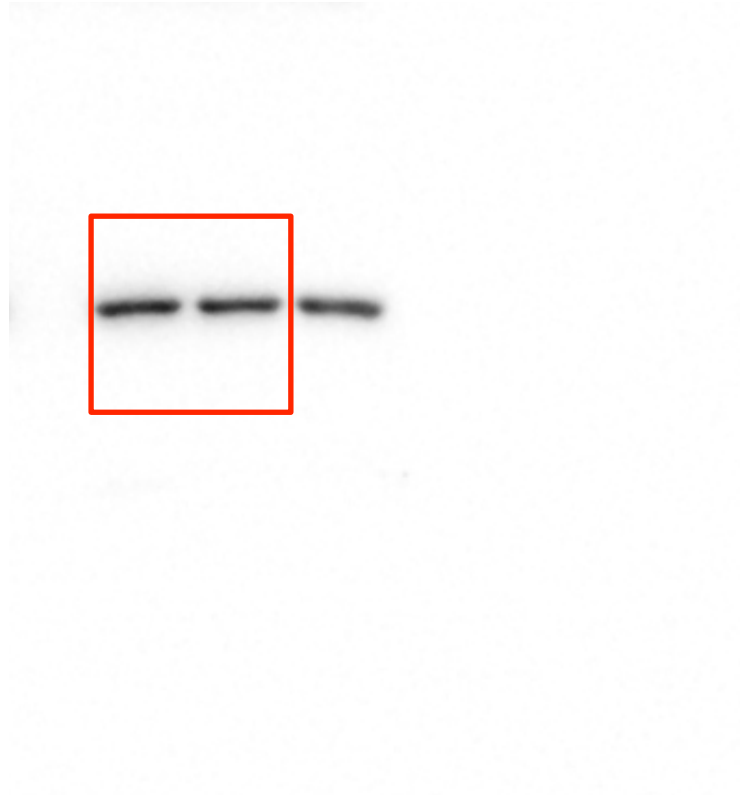

Red marked area was used for the figure.

Membrane was cut after transfer, and before probing by Ab

Right lane is the same protein with higher concentration of staurosporine

Fig. 4. PKC inhibitors impair interactions between CycT1 and CDK9, and promote CycT1 degradation

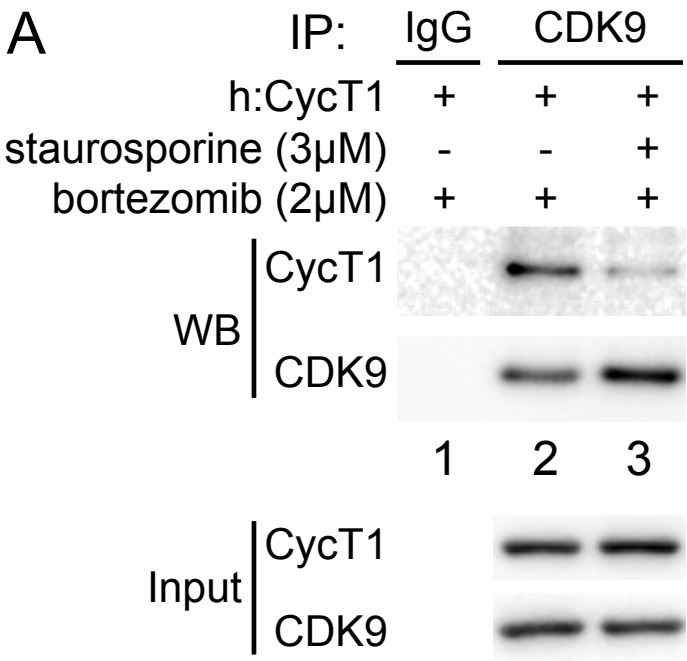

Source blot for Figure 4B

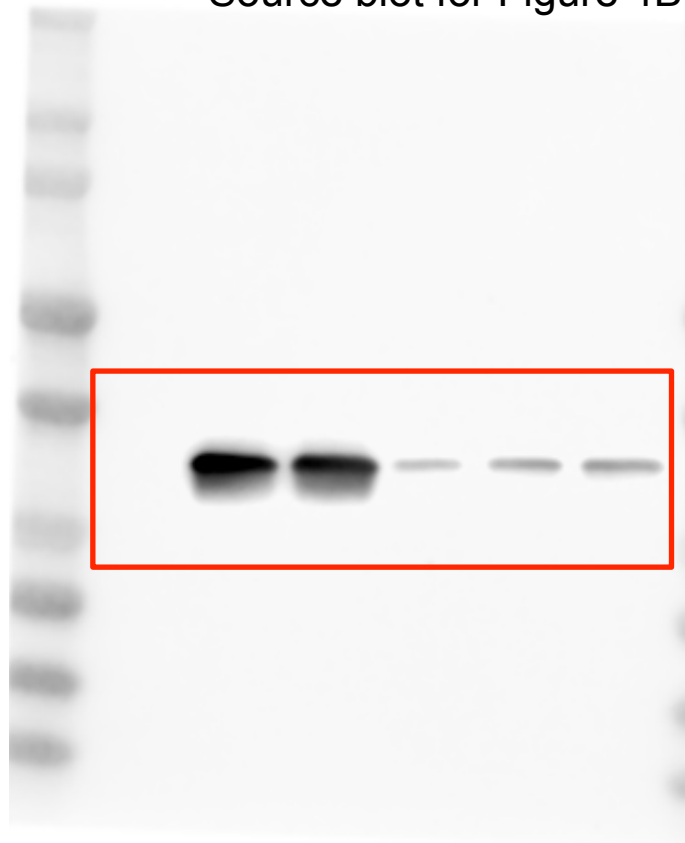

Red marked area was used for the figure.

## Source blot for Figure 4B

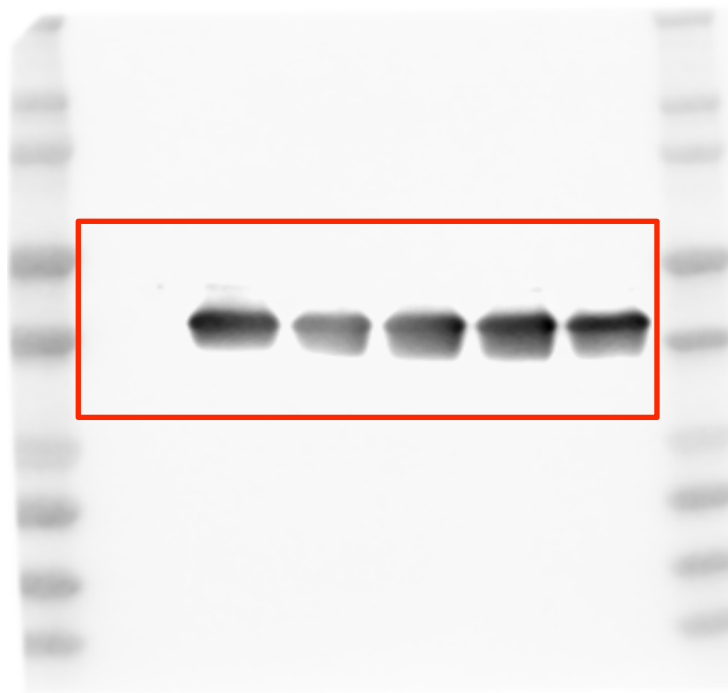

Red marked area was used for the figure.

## Source blot for Figure 4B

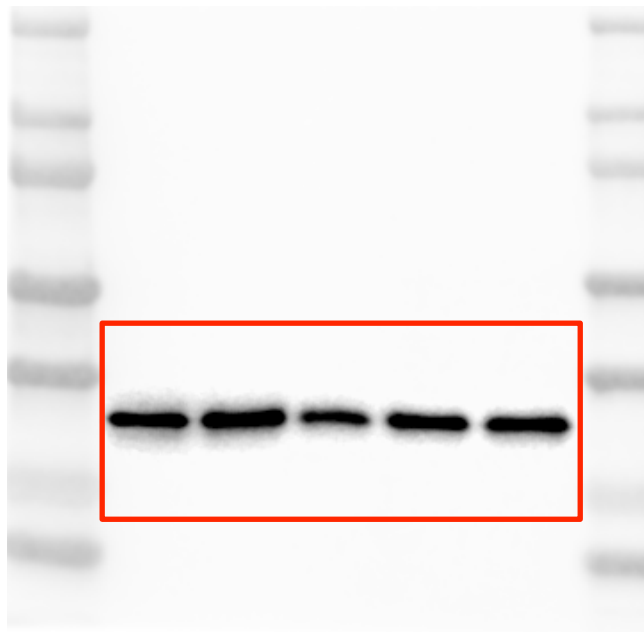

Red marked area was used for the figure.

## Source blot for Figure 4B

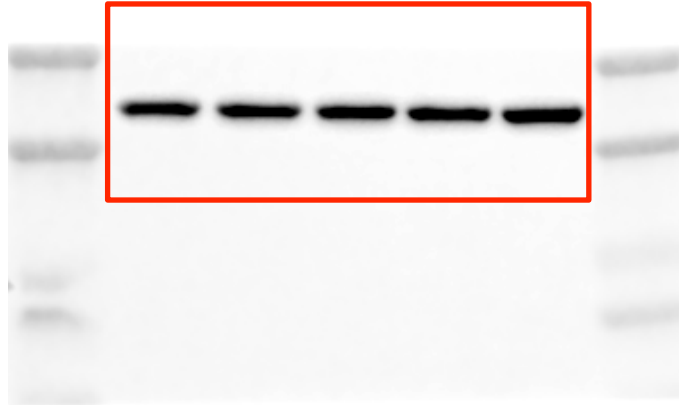

Red marked area was used for the figure.  
Membrane was cut after transfer, and before probing by Ab

Fig. 4. PKC inhibitors impair interactions between CycT1 and CDK9, and promote CycT1 degradation

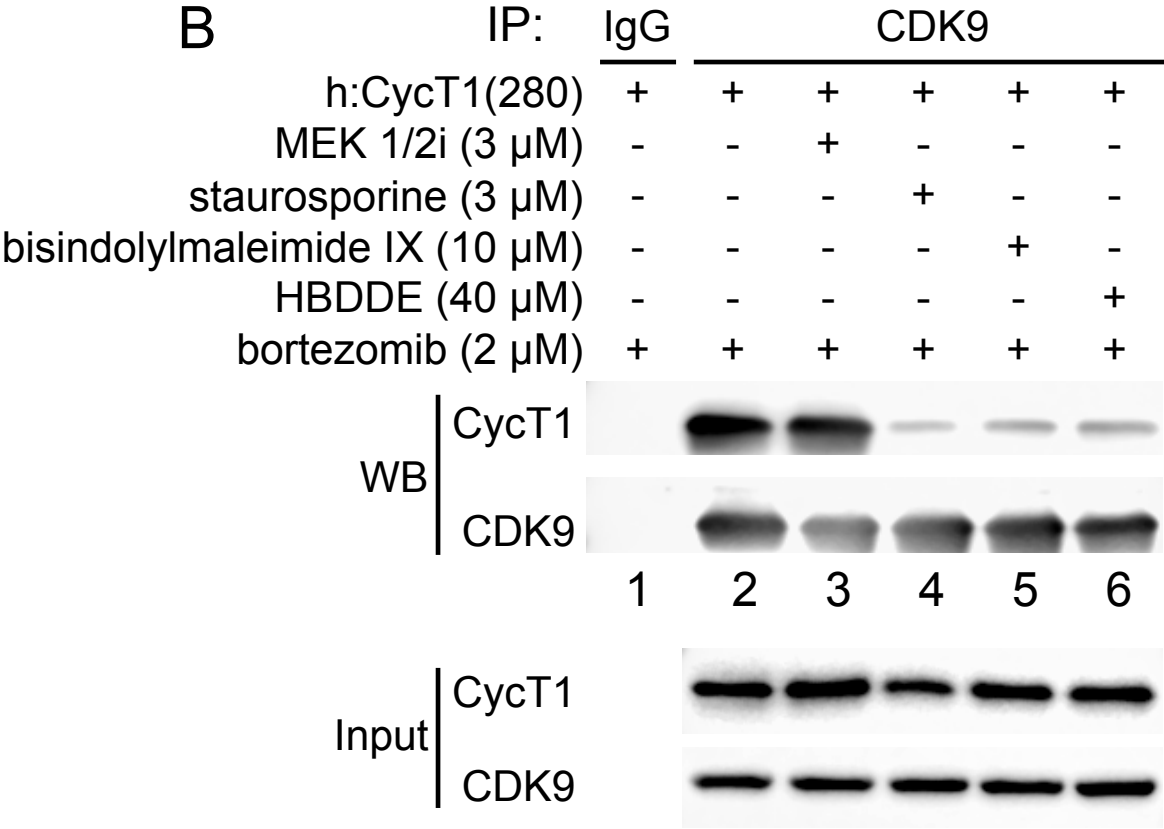

## Source blot for Figure 4C

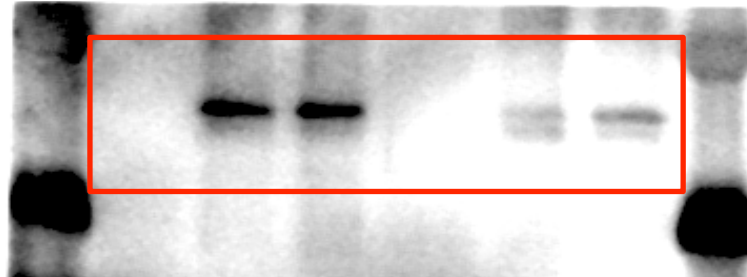

Red marked area was used for the figure.

Membrane was cut after transfer, and before probing by Ab

## Source blot for Figure 4C

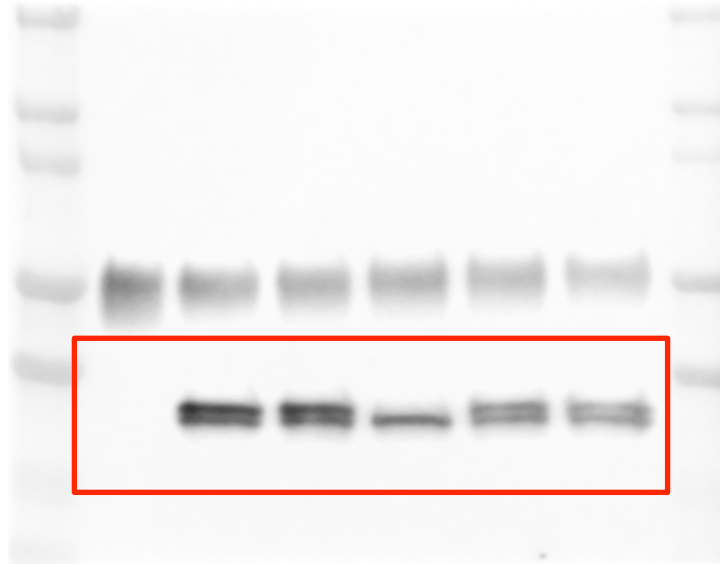

Red marked area was used for the figure.

Membrane was cut after transfer, and before probing by Ab  
upper bands are heavy chain

## Source blot for Figure 4C

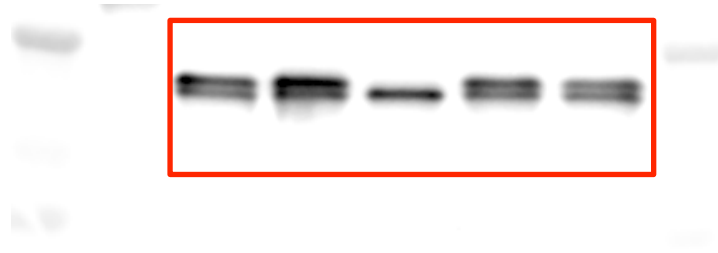

Red marked area was used for the figure.

Membrane was cut after transfer, and before probing by Ab

Fig. 4. PKC inhibitors impair interactions between CycT1 and CDK9, and promote CycT1 degradation

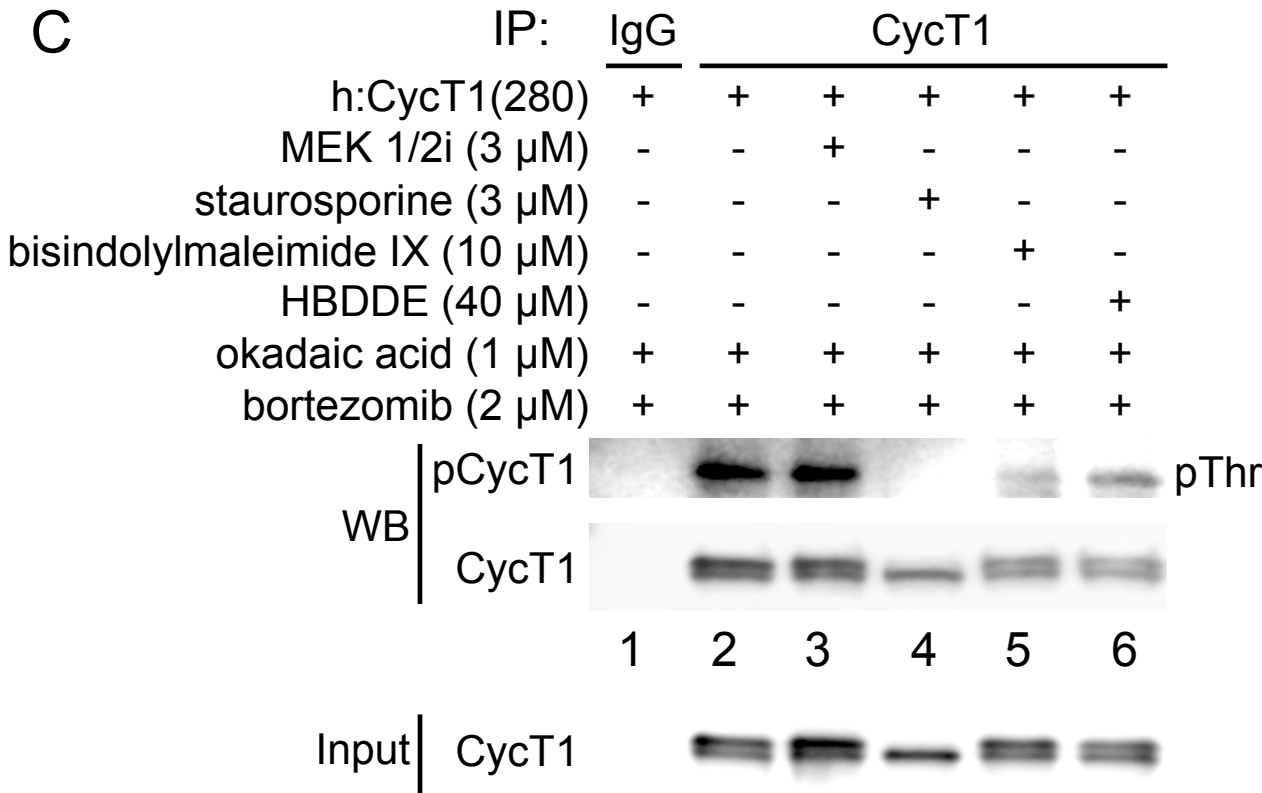

## Source blot for Figure 4D

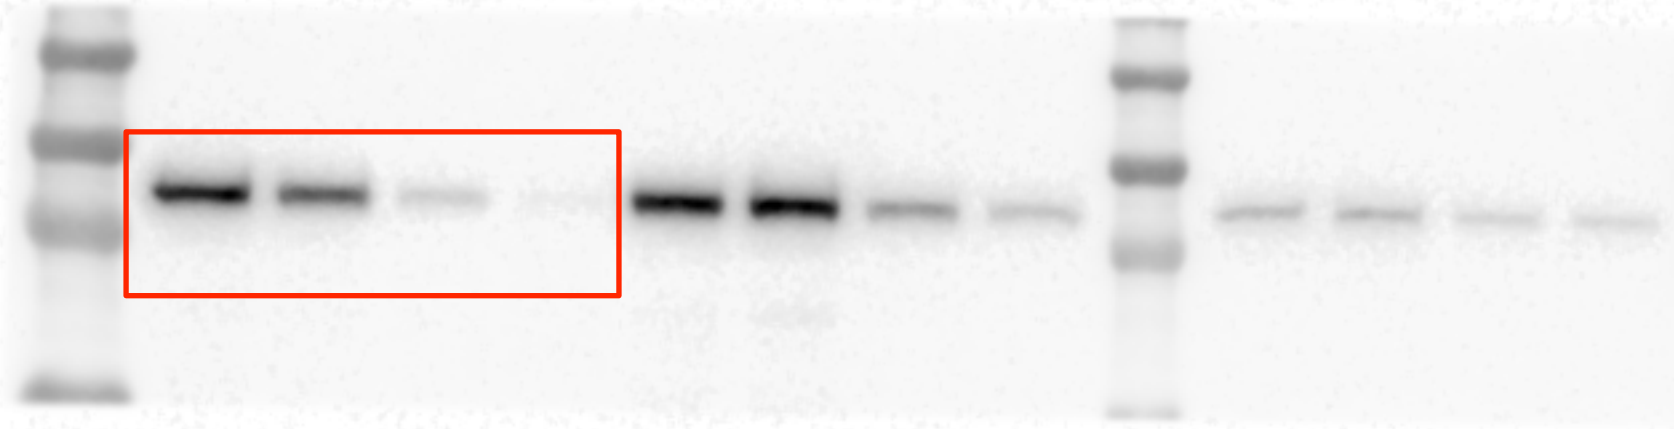

Red marked area was used for the figure.

Membrane was cut after transfer, and before probing by Ab

Right four lanes are for Figure 4E

Others are under different conditions

## Source blot for Figure 4D

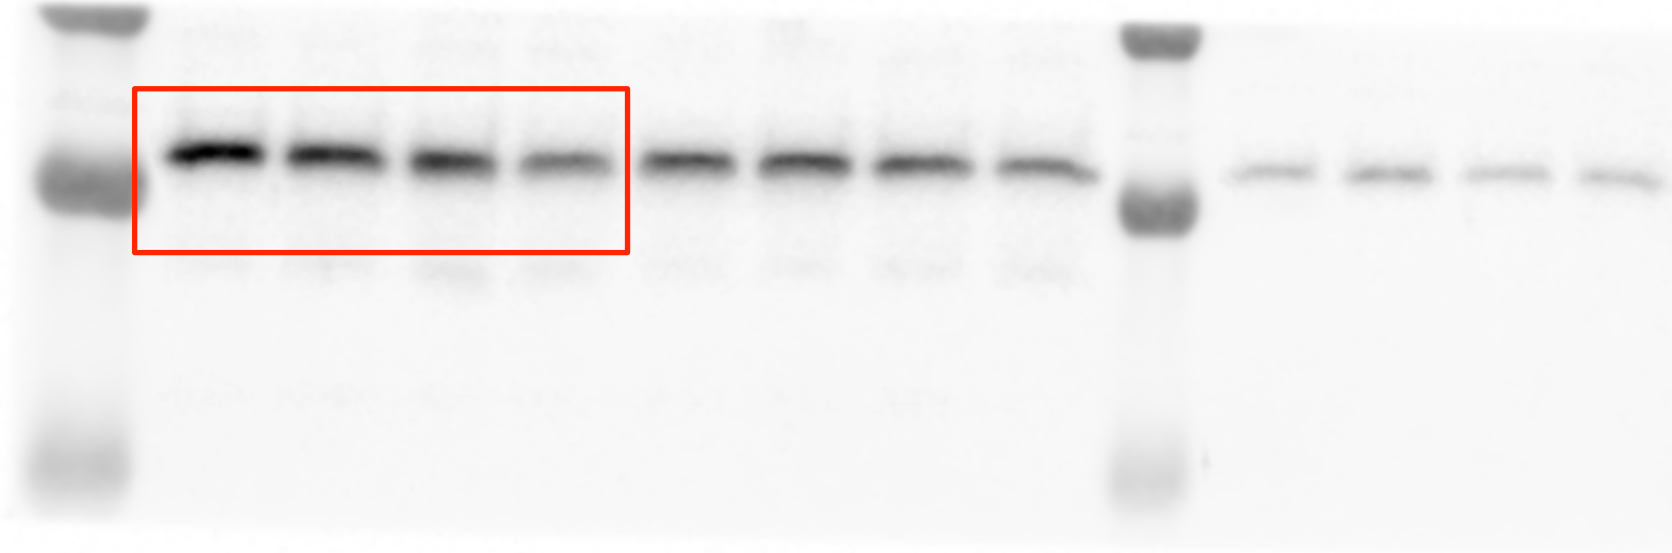

Red marked area was used for the figure.

Membrane was cut after transfer, and before probing by Ab

Right four lanes are for Figure 4E

Others are under different conditions

## Source blot for Figure 4D

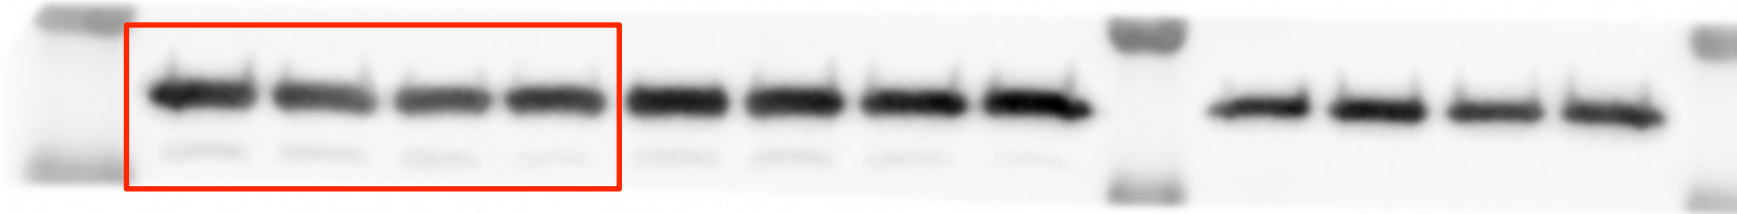

Red marked area was used for the figure.

Membrane was cut after transfer, and before probing by Ab

Right four lanes are for Figure 4E

Others are under different conditions

Fig. 4. PKC inhibitors impair interactions between CycT1 and CDK9, and promote CycT1 degradation

Jurkat cells

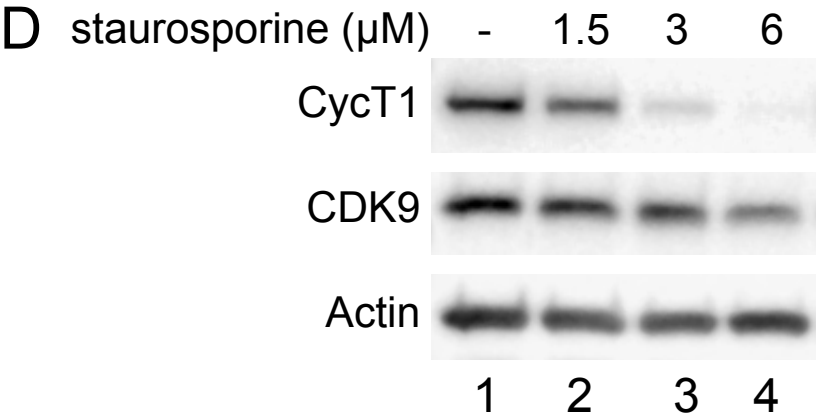

## Source blot for Figure 4E

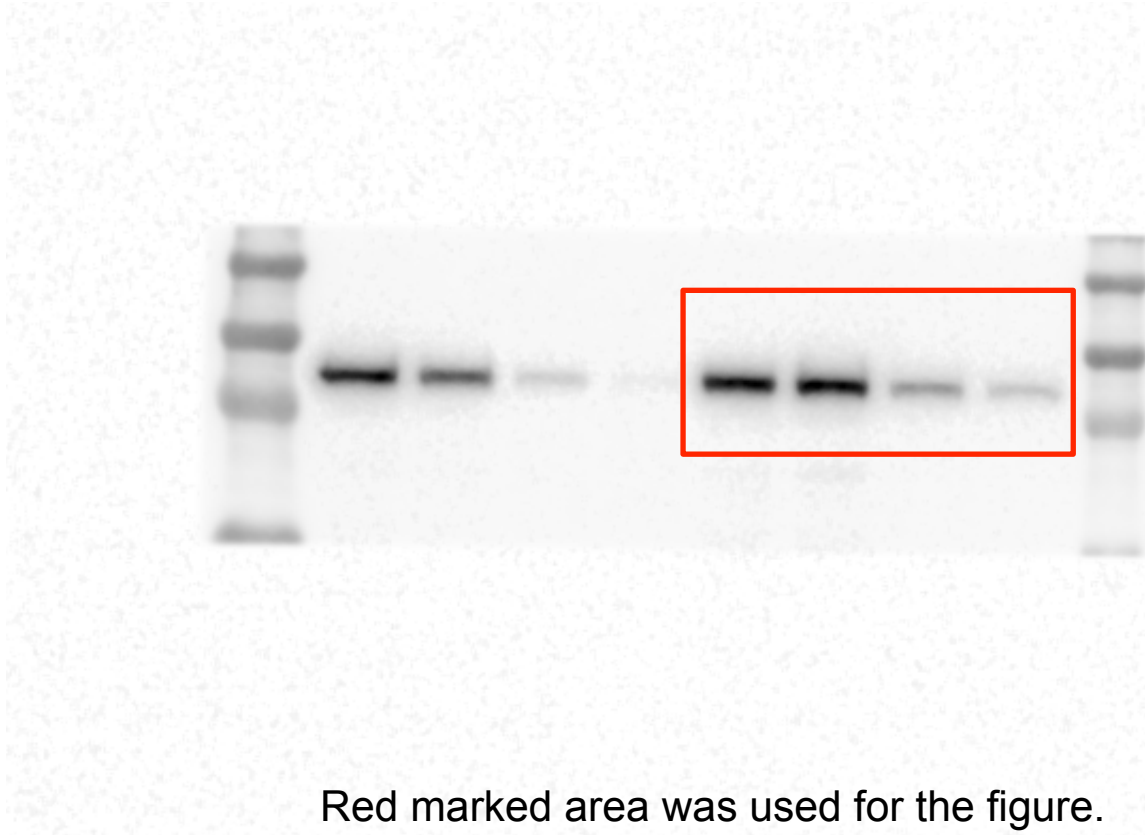

Red marked area was used for the figure.

Membrane was cut after transfer, and before probing by Ab  
Left four lanes are for Figure 4D

## Source blot for Figure 4E

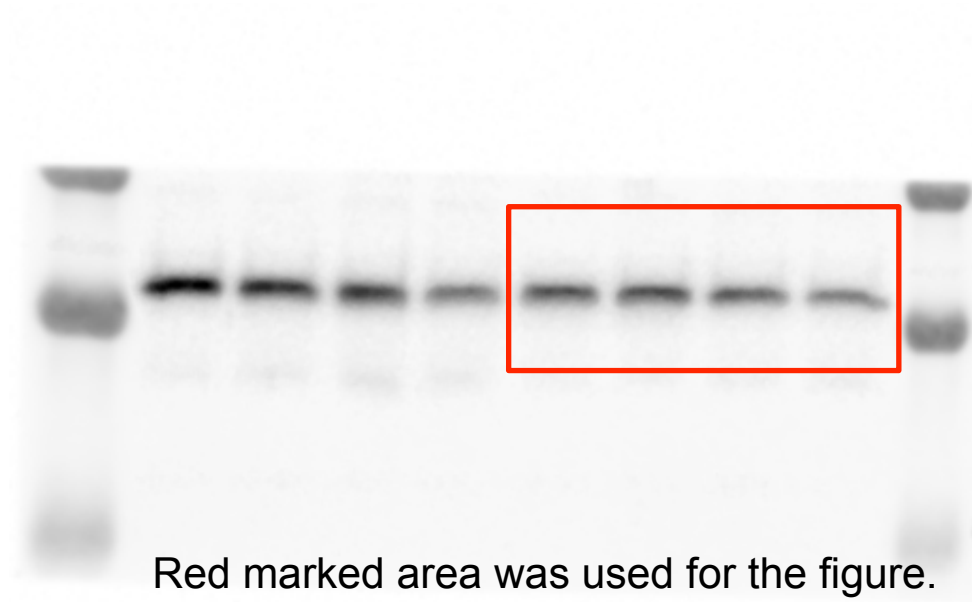

Red marked area was used for the figure.

Membrane was cut after transfer, and before probing by Ab  
Left four lanes are for Figure 4D

## Source blot for Figure 4E

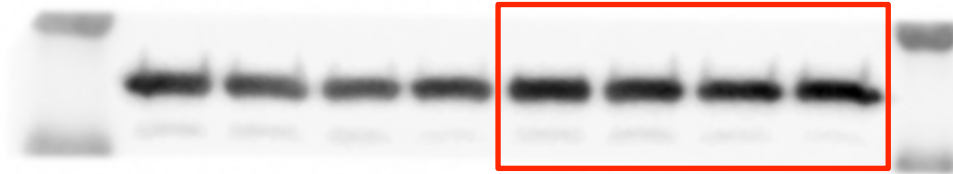

Red marked area was used for the figure.

Membrane was cut after transfer, and before probing by Ab  
Left four lanes are for Figure 4D

Fig. 4. PKC inhibitors impair interactions between CycT1 and CDK9, and promote CycT1 degradation

Jurkat cells

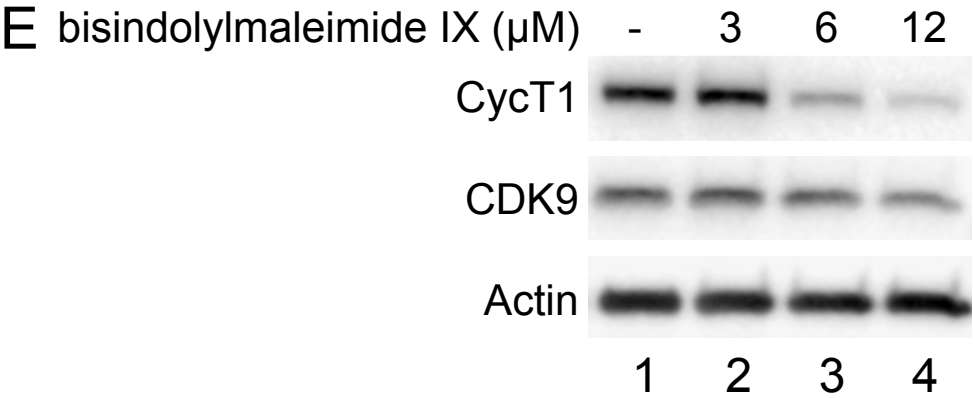

## Source blot for Figure 4F

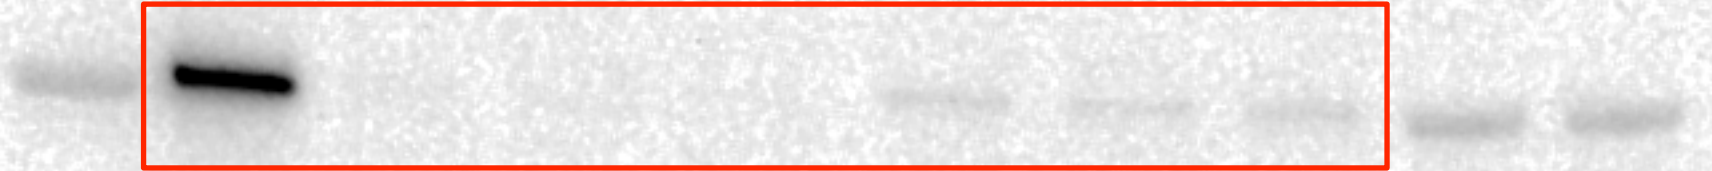

Red marked area was used for the figure.

Membrane was cut after transfer, and before probing by Ab

Source blot for Figure 4F

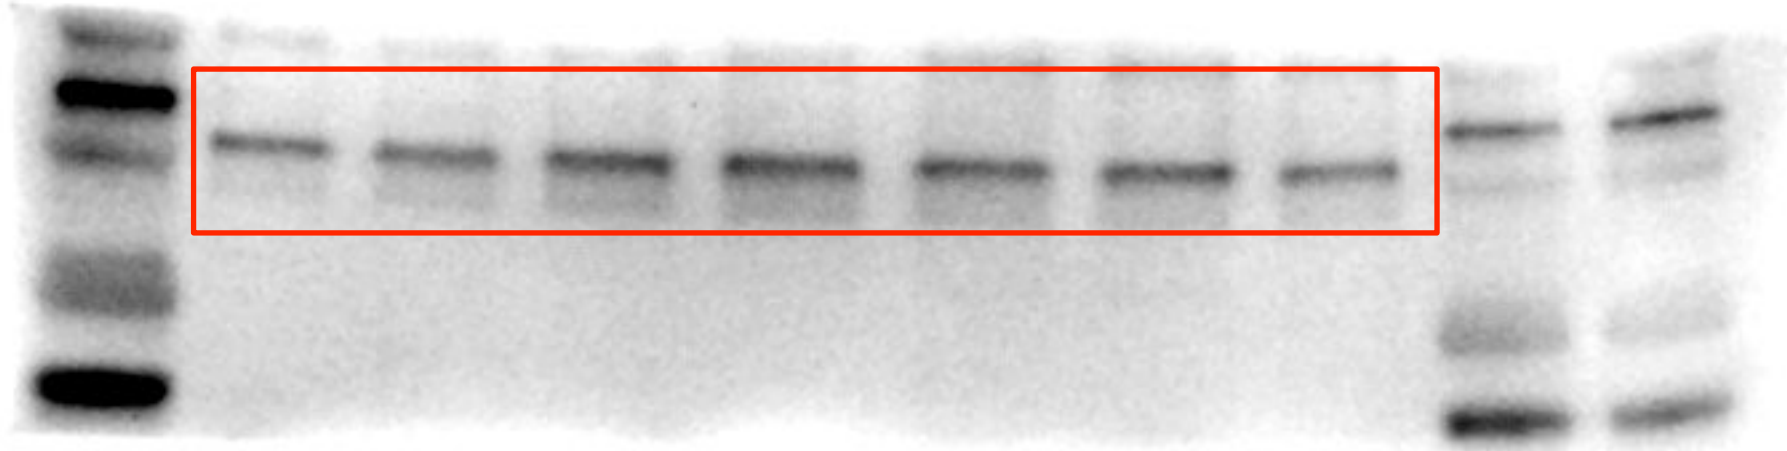

Red marked area was used for the figure.

Membrane was cut after transfer, and before probing by Ab

## Source blot for Figure 4F

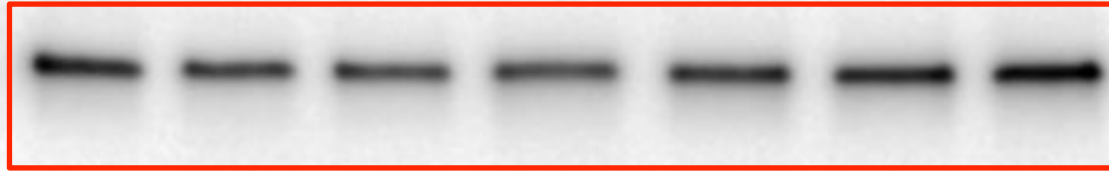

Red marked area was used for the figure.

Membrane was cut after transfer, and before probing by Ab  
Two different cut membranes are in the same tray for imaging

Fig. 4. PKC inhibitors impair interactions between CycT1 and CDK9, and promote CycT1 degradation

Activated Primary CD4+ T cells

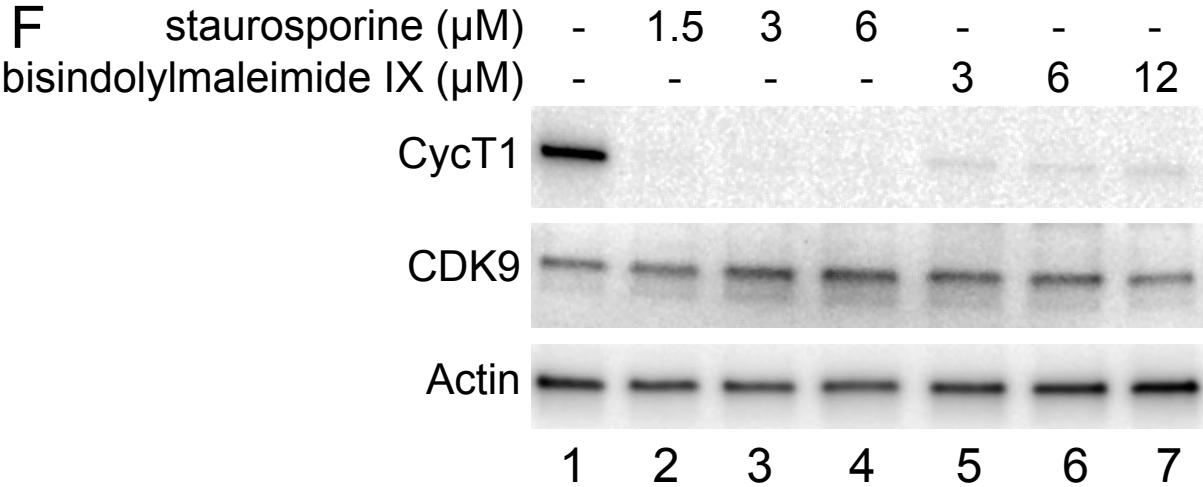

Source blot for Figure 5A

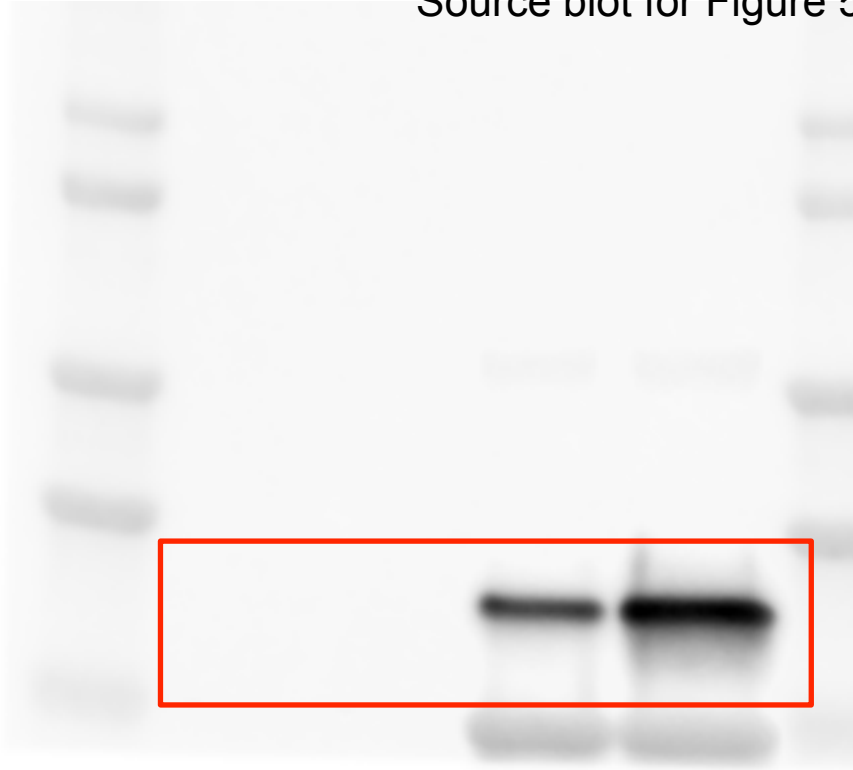

Red marked area was used for the figure.

Membrane was cut after transfer, and before probing by Ab

## Source blot for Figure 5A

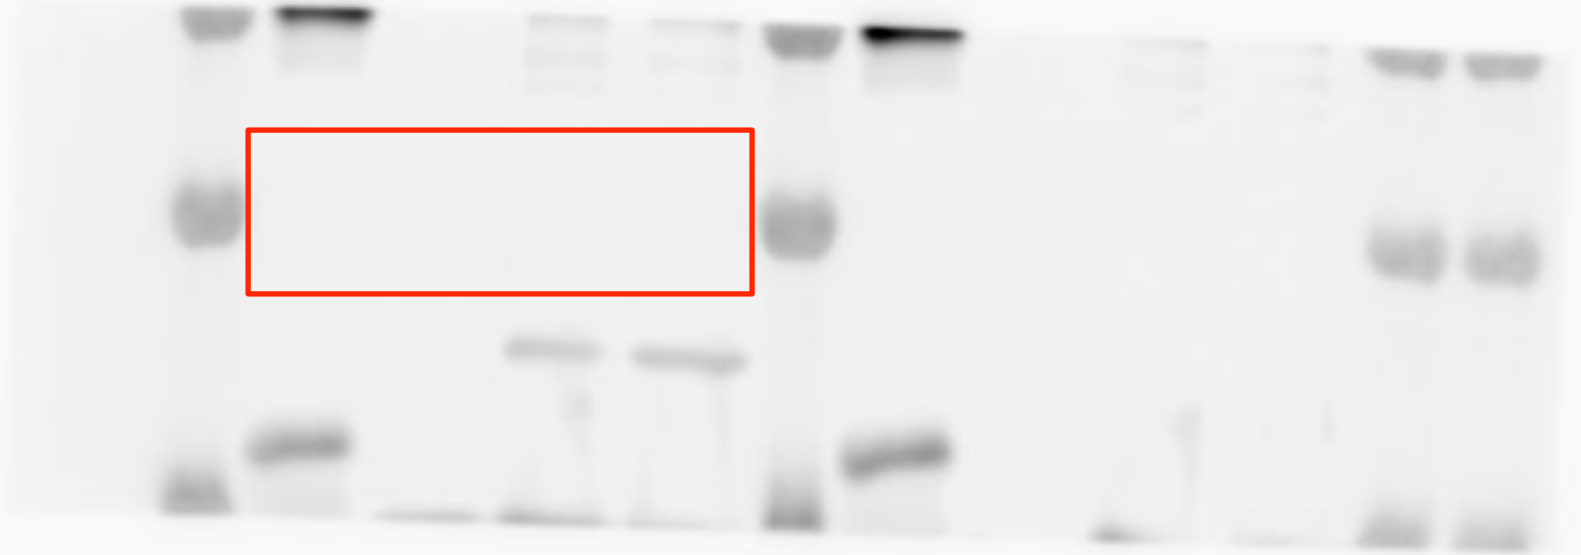

Red marked area was used for the figure.

Membrane was cut after transfer, and before probing by Ab

## Source blot for Figure 5A

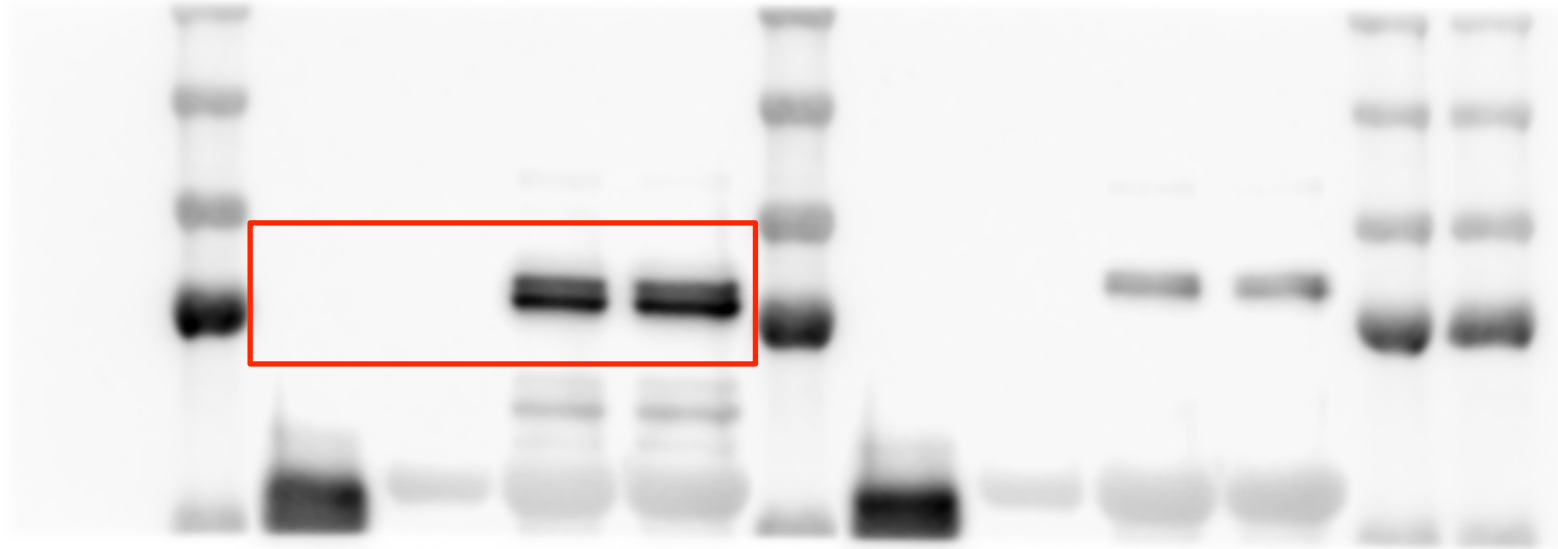

Red marked area was used for the figure.

Membrane was cut after transfer, and before probing by Ab  
Right lanes are other proteins with same tag

## Source blot for Figure 5A

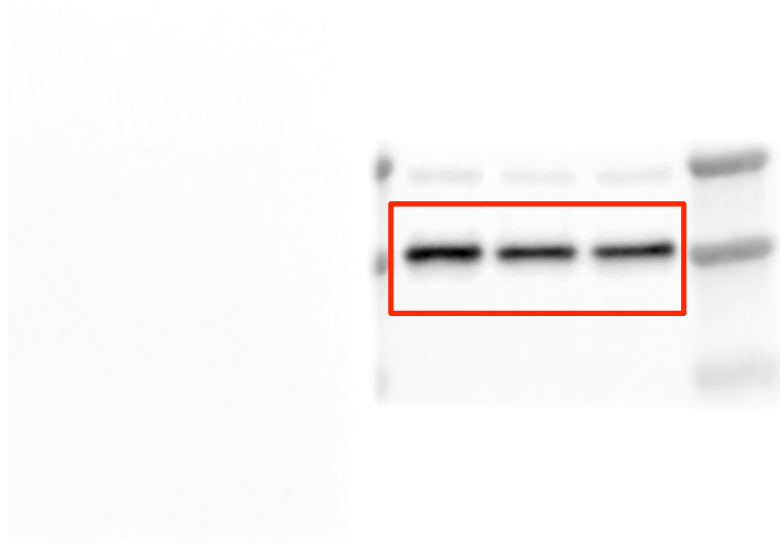

Red marked area was used for the figure.

Membrane was cut after transfer, and before probing by Ab

## Source blot for Figure 5A

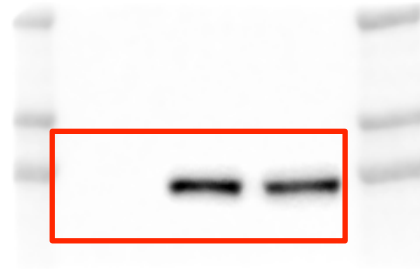

Red marked area was used for the figure.

Membrane was cut after transfer, and before probing by Ab

Fig. 5. PKC $\alpha$  and PKC $\beta$  bind to CycT1 for its phosphorylation, also promote interactions between CycT1 and CDK9, and increase the stability of CycT1

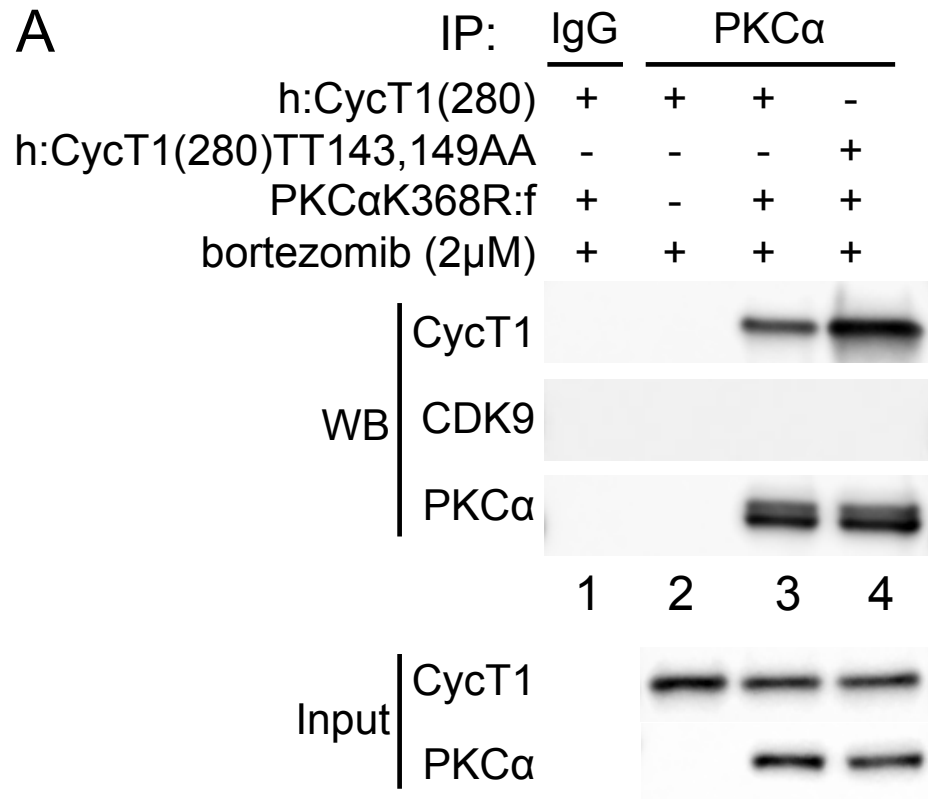

Source blot for Figure 5B

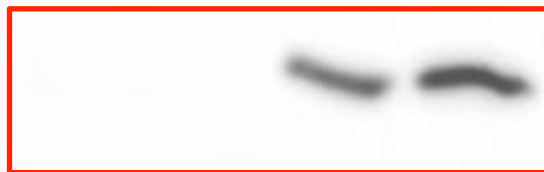

Red marked area was used for the figure.

Membrane was cut after transfer, and before probing by Ab

Source blot for Figure 5B

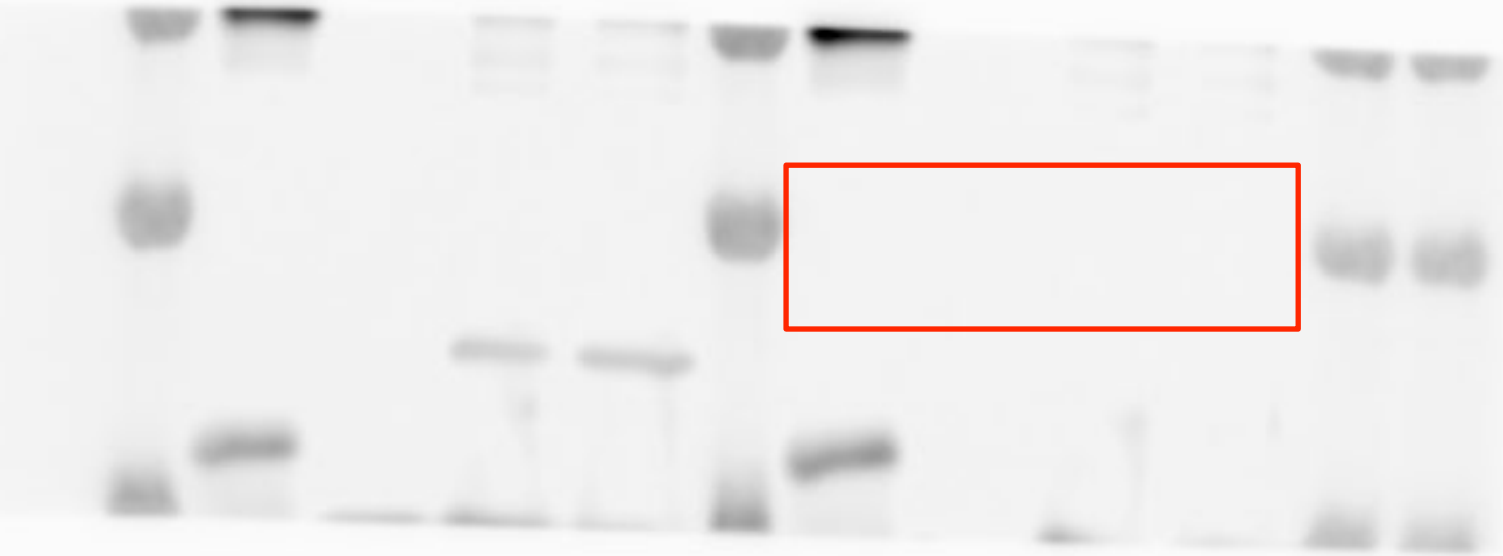

Red marked area was used for the figure.

Membrane was cut after transfer, and before probing by Ab

## Source blot for Figure 5B

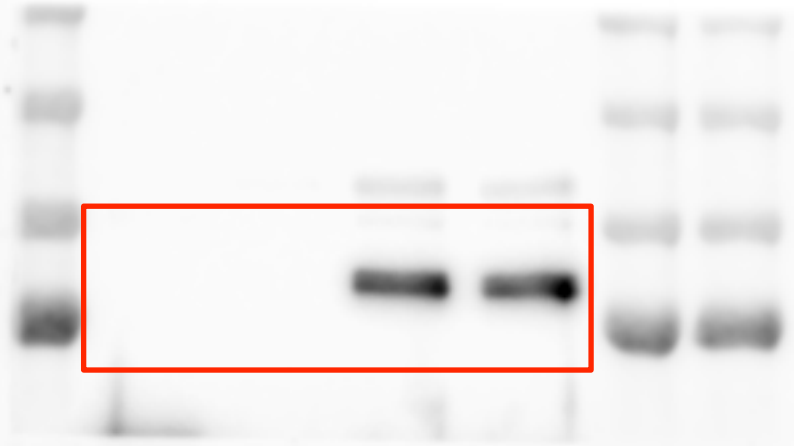

Red marked area was used for the figure.

Membrane was cut after transfer, and before probing by Ab

## Source blot for Figure 5B

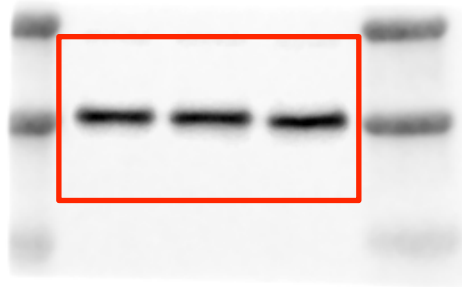

Red marked area was used for the figure.

Membrane was cut after transfer, and before probing by Ab

## Source blot for Figure 5B

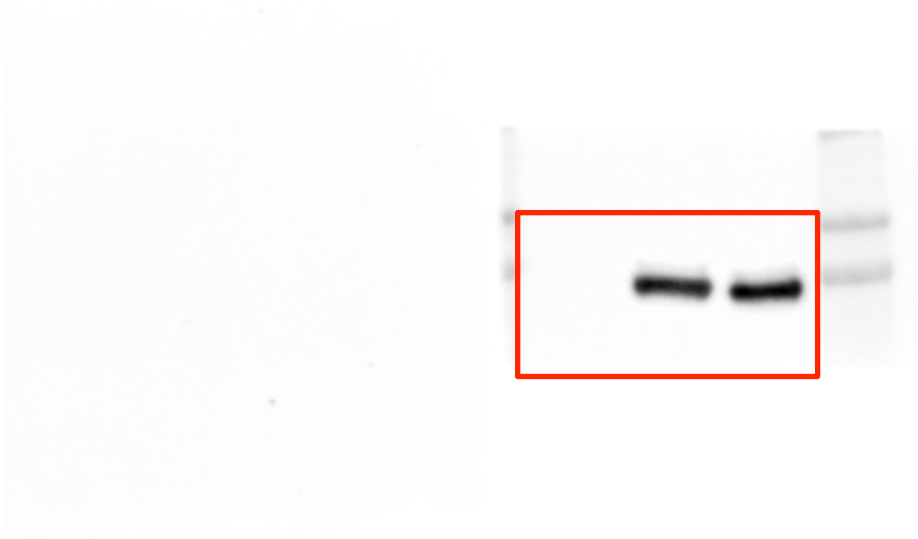

Red marked area was used for the figure.

Membrane was cut after transfer, and before probing by Ab

Fig. 5. PKC $\alpha$  and PKC $\beta$  bind to CycT1 for its phosphorylation, also promote interactions between CycT1 and CDK9, and increase the stability of CycT1

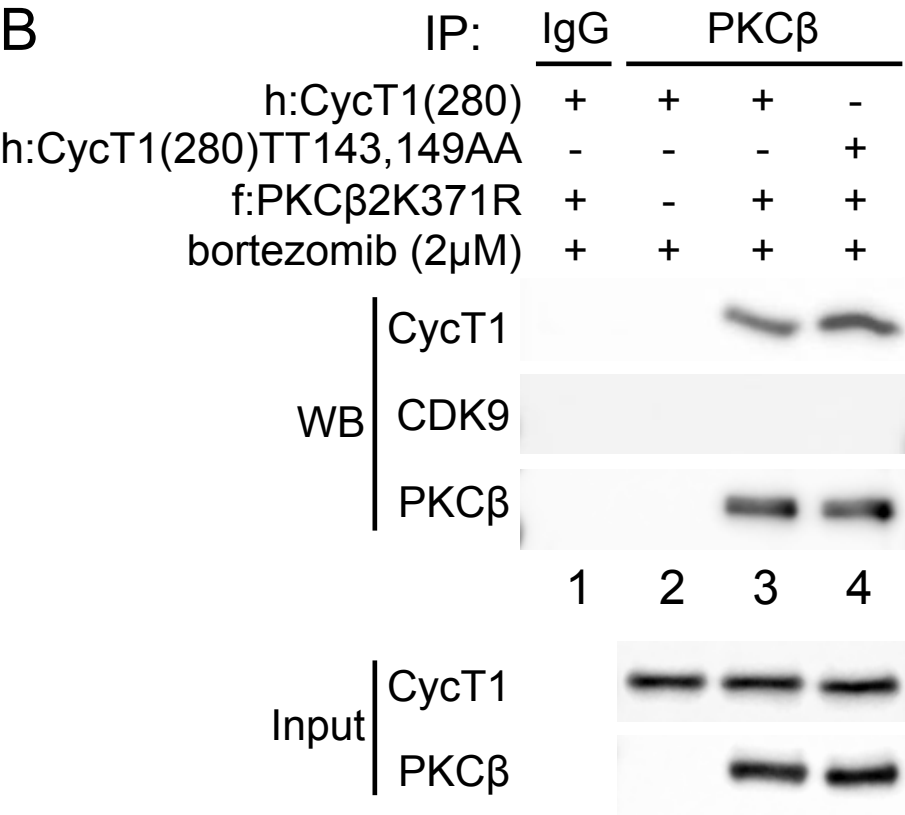

Source blot for Figure 5C

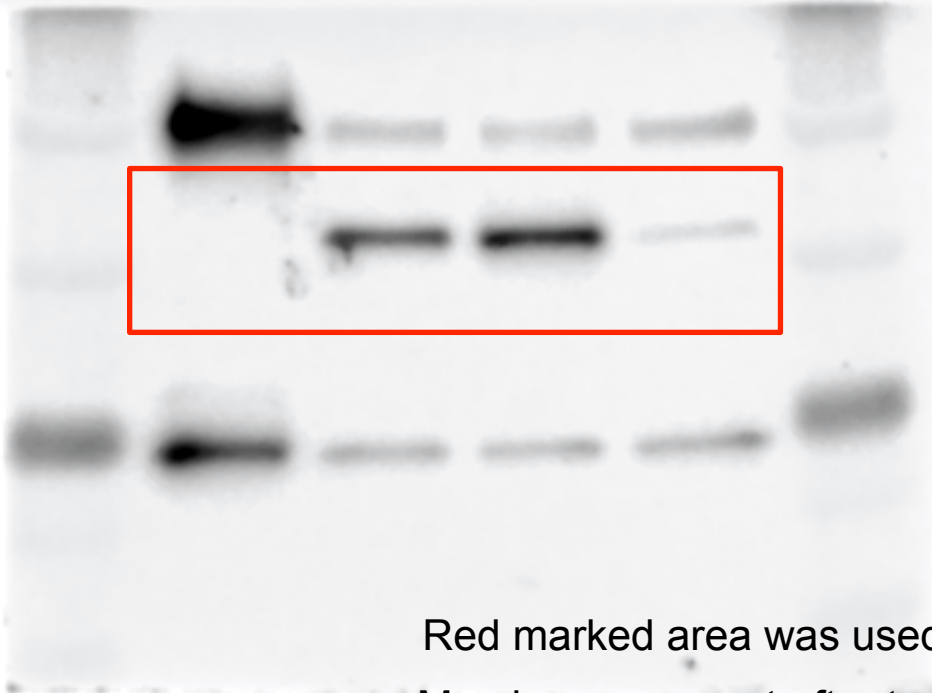

Red marked area was used for the figure.

Membrane was cut after transfer, and before probing by Ab  
upper and lower bands are heavy chains and light chains

## Source blot for Figure 5C

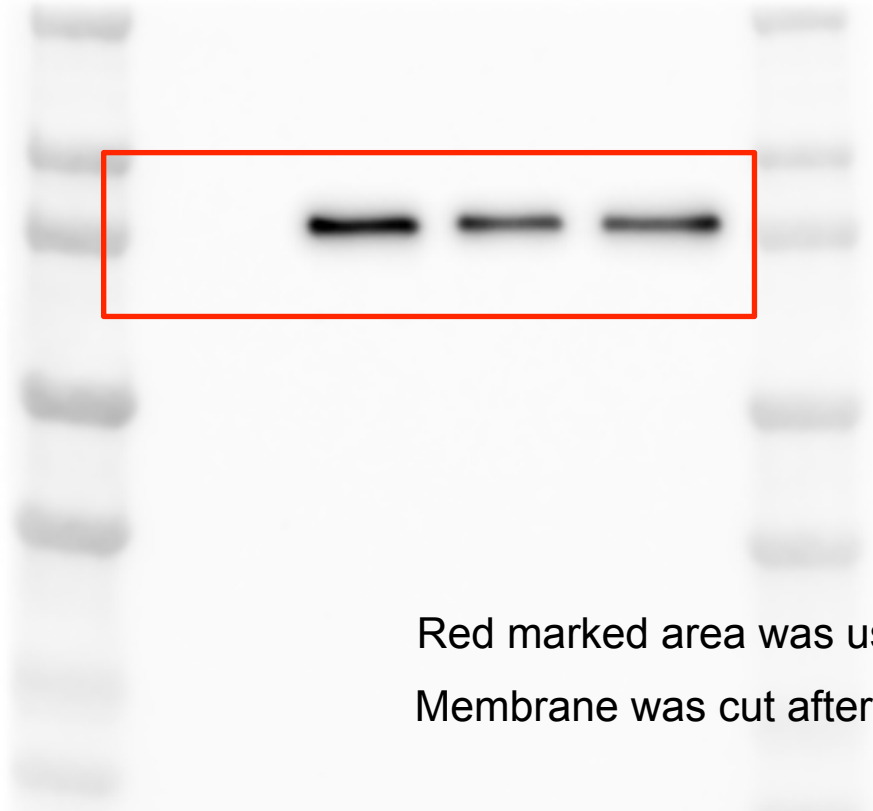

Red marked area was used for the figure.

Membrane was cut after transfer, and before probing by Ab

## Source blot for Figure 5C

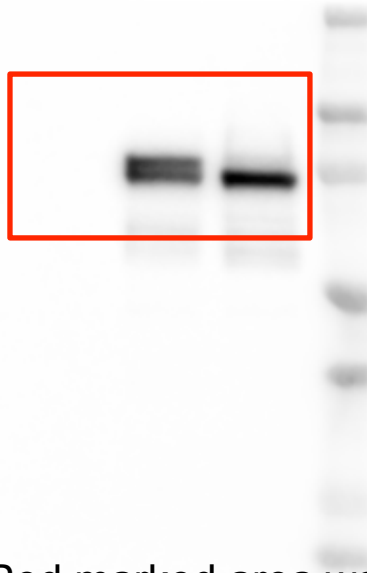

Red marked area was used for the figure.

Membrane was cut after transfer, and before probing by Ab

## Source blot for Figure 5C

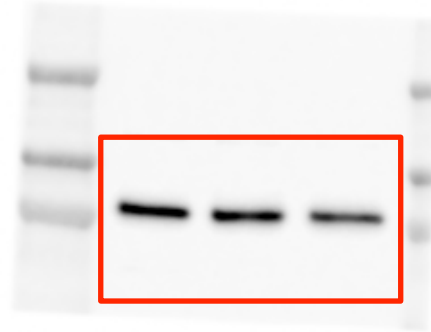

Red marked area was used for the figure.

Membrane was cut after transfer, and before probing by Ab

## Source blot for Figure 5C

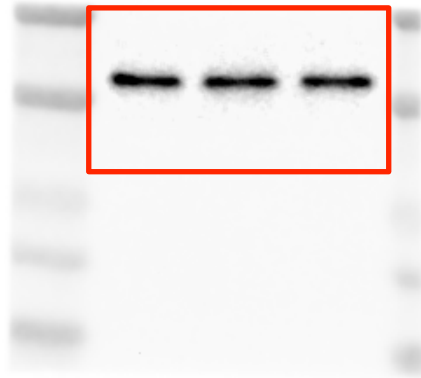

Red marked area was used for the figure.

Membrane was cut after transfer, and before probing by Ab

Fig. 5. PKC $\alpha$  and PKC $\beta$  bind to CycT1 for its phosphorylation, also promote interactions between CycT1 and CDK9, and increase the stability of CycT1

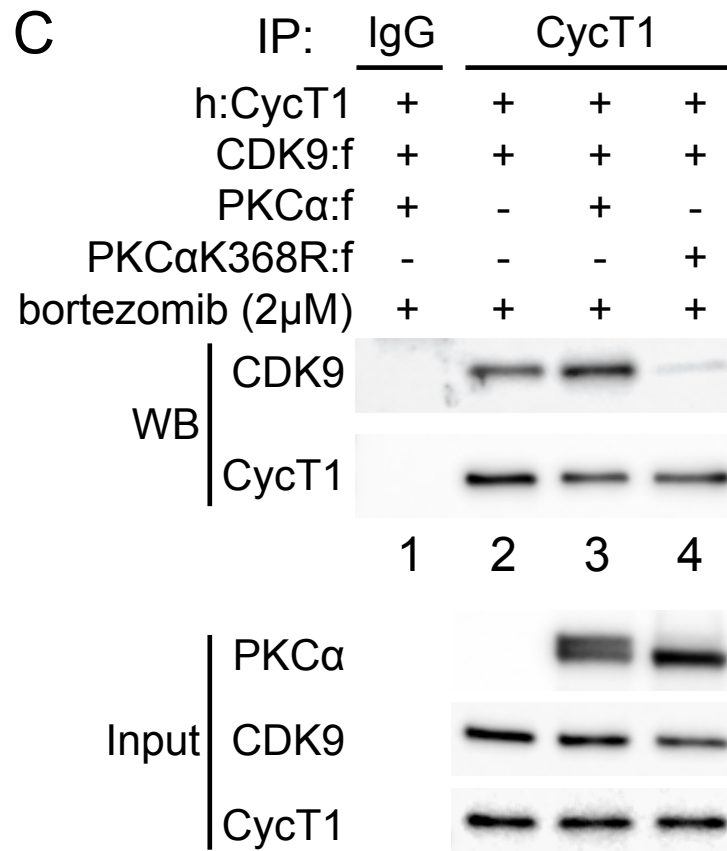

## Source blot for Figure 5D

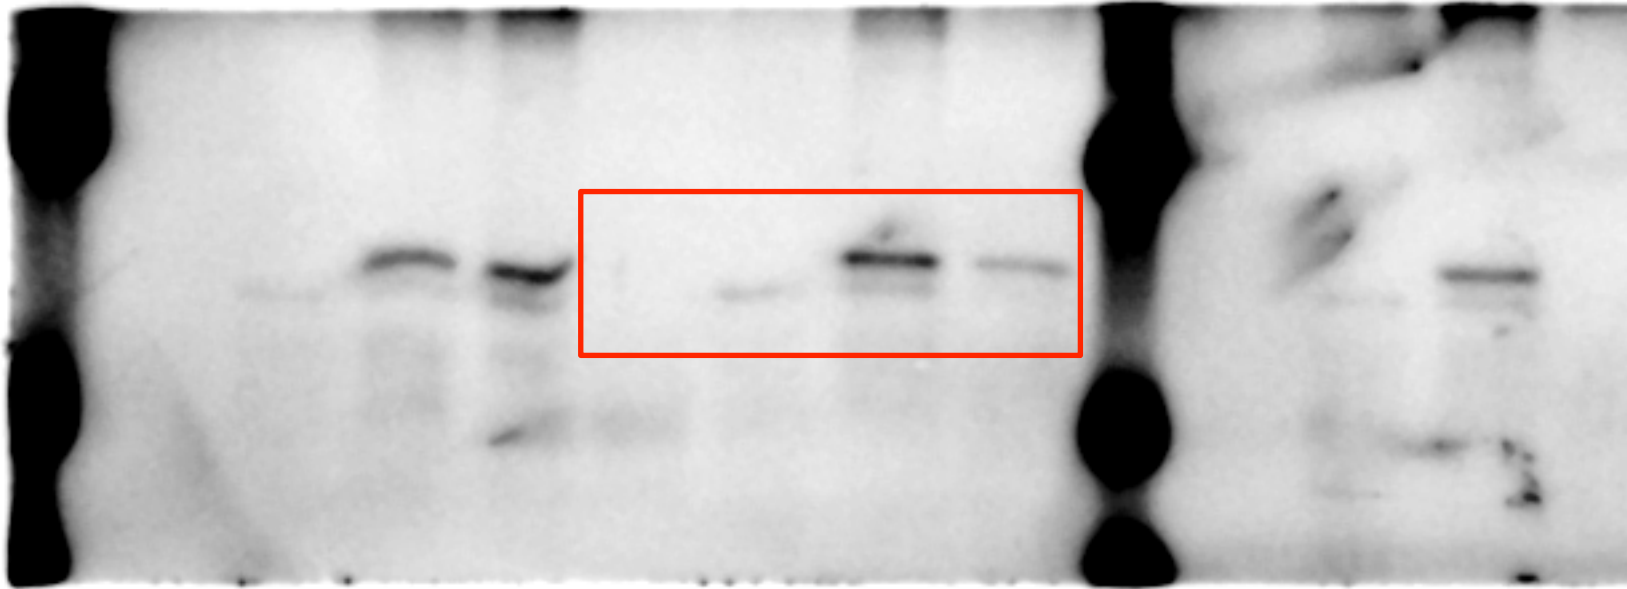

Red marked area was used for the figure.

Membrane was cut after transfer, and before probing by Ab  
other bands are same proteins under different conditions

## Source blot for Figure 5D

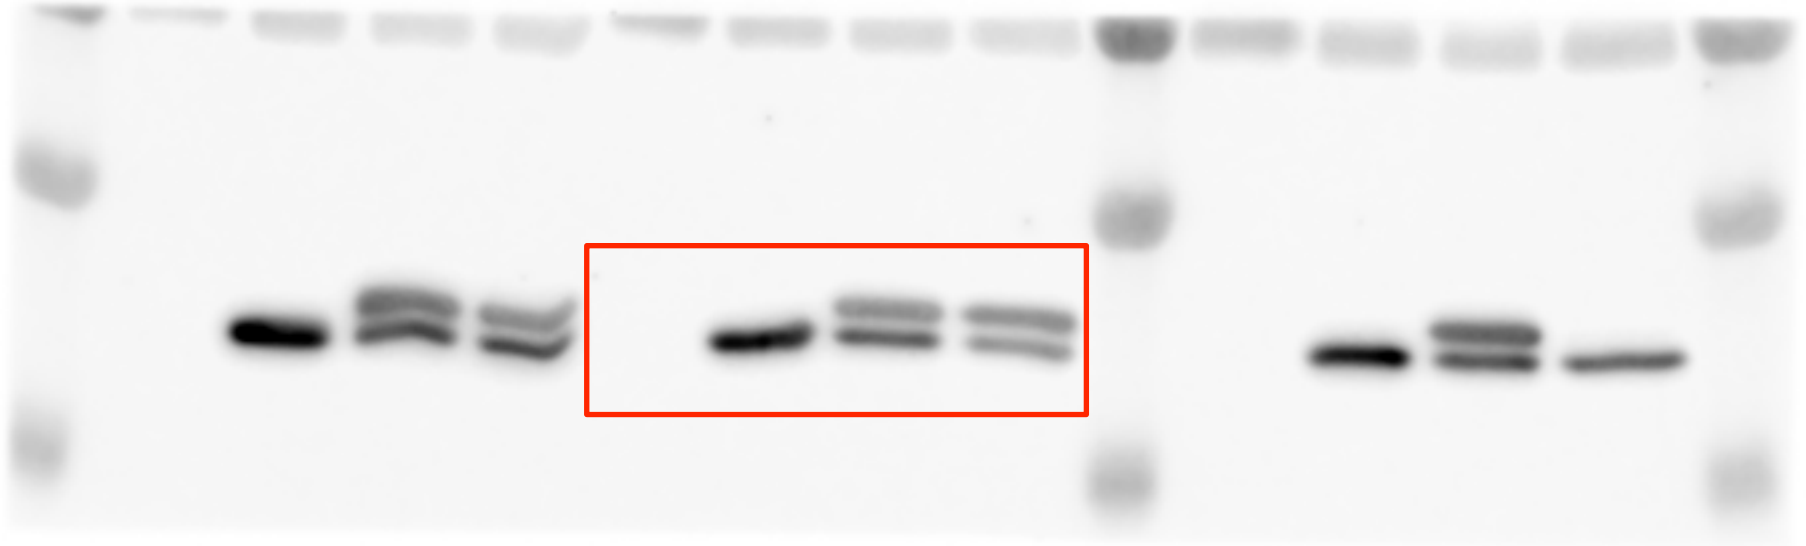

Red marked area was used for the figure.

Membrane was cut after transfer, and before probing by Ab  
other bands are same proteins under different conditions

# Source blot for Figure 5D

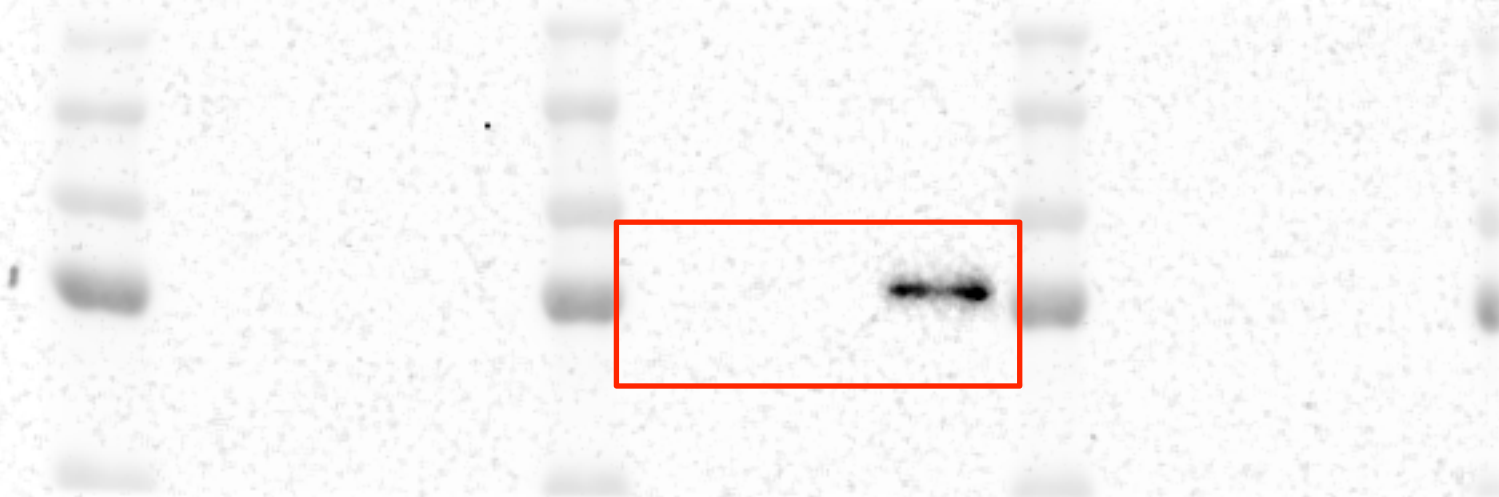

Red marked area was used for the figure.

Membrane was cut after transfer, and before probing by Ab

Source blot for Figure 5D

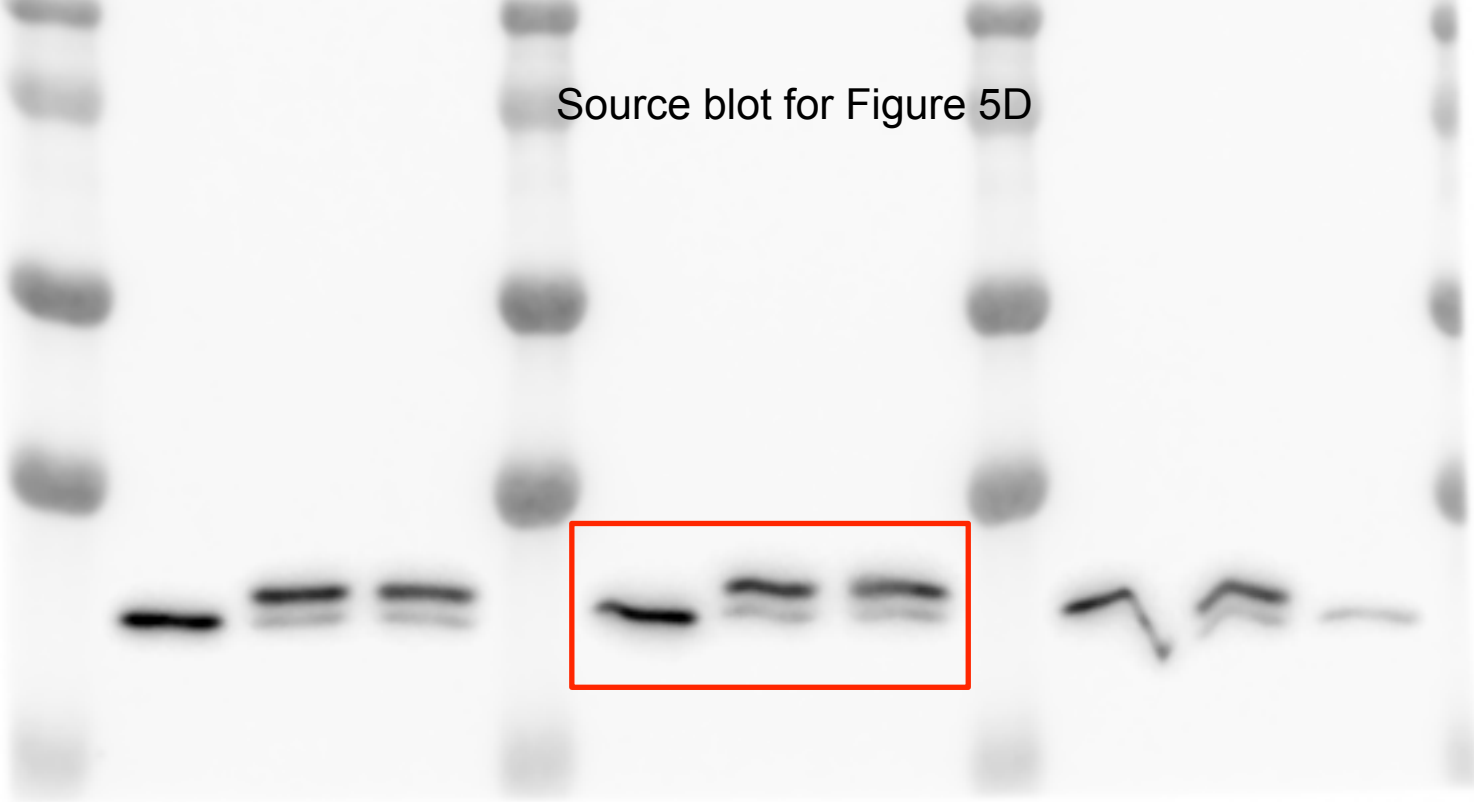

Red marked area was used for the figure.

Membrane was cut after transfer, and before probing by Ab  
other bands are same proteins under different conditions

Fig. 5. PKCα and PKCβ bind to CycT1 for its phosphorylation, also promote interactions between CycT1 and CDK9, and increase the stability of CycT1

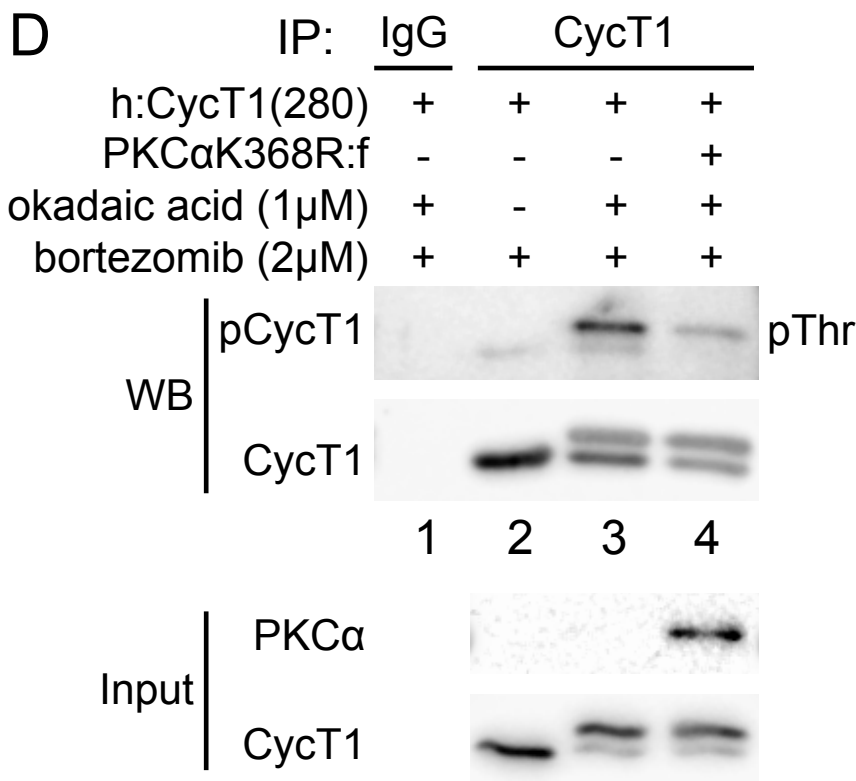

# Source blot for Figure 5E

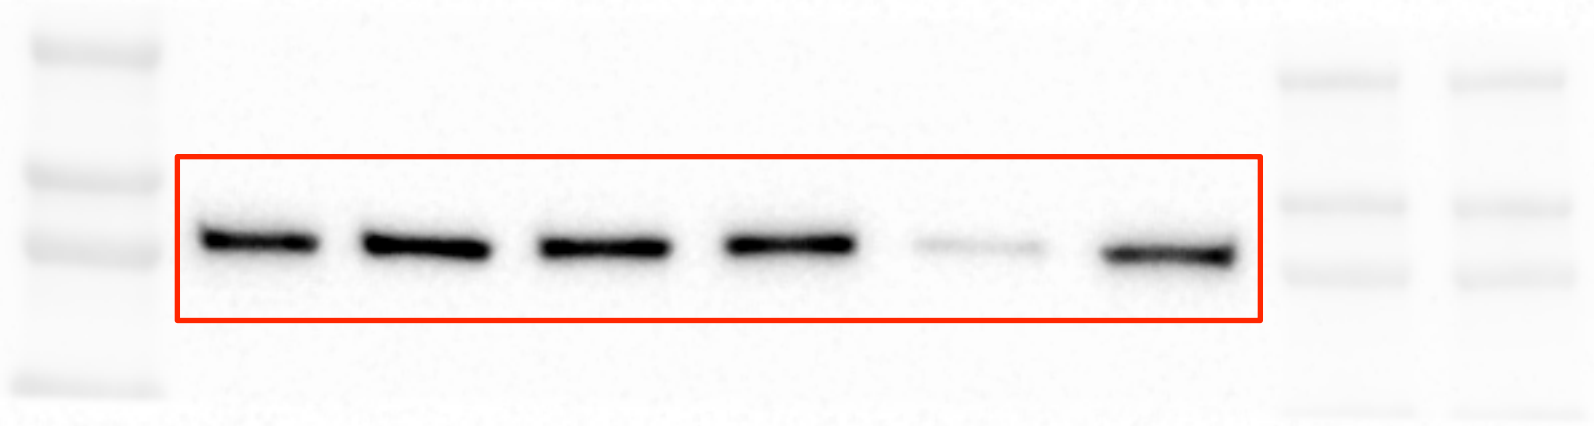

Red marked area was used for the figure.

Membrane was cut after transfer, and before probing by Ab

## Source blot for Figure 5E

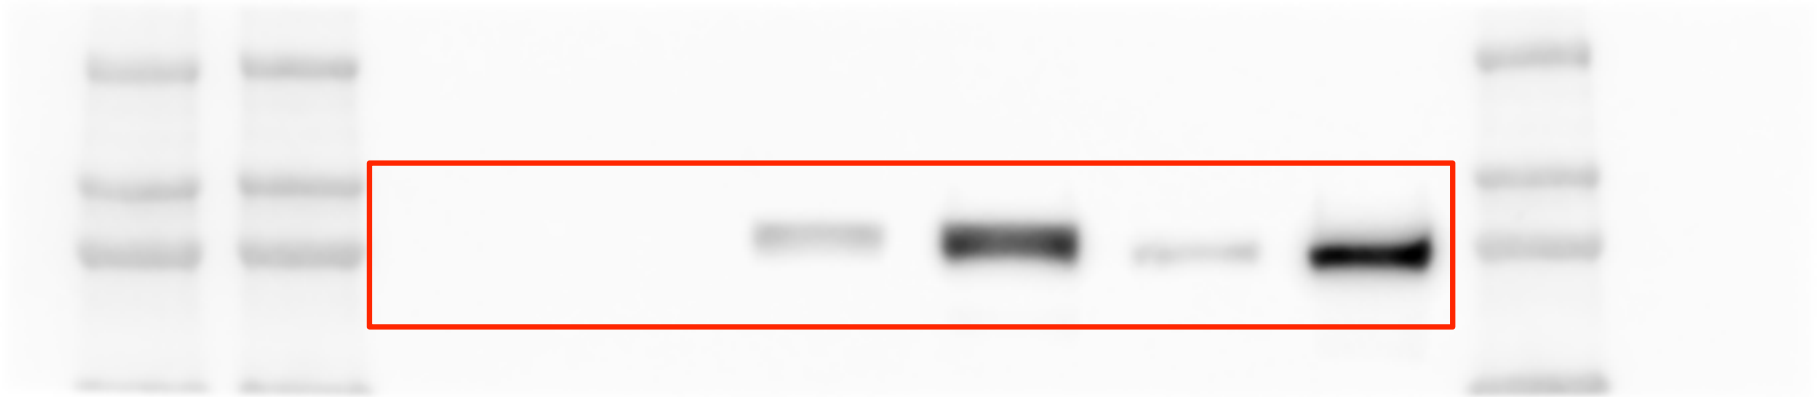

Red marked area was used for the figure.

Membrane was cut after transfer, and before probing by Ab

## Source blot for Figure 5E

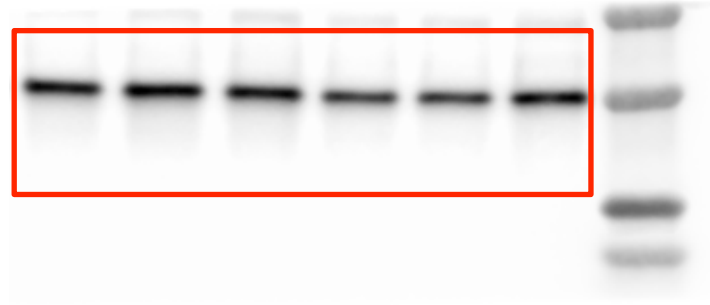

Red marked area was used for the figure.

Membrane was cut after transfer, and before probing by Ab

## Source blot for Figure 5E

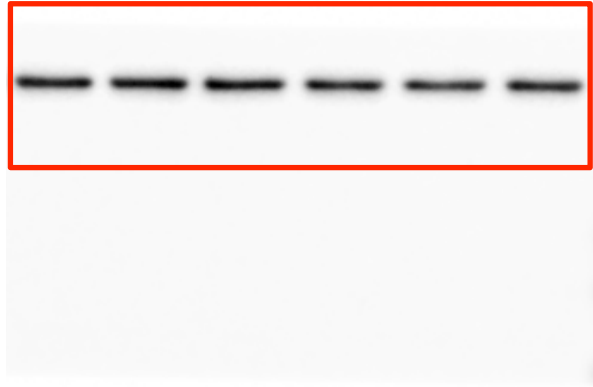

Red marked area was used for the figure.

Membrane was cut after transfer, and before probing by Ab

Fig. 5. PKC $\alpha$  and PKC $\beta$  bind to CycT1 for its phosphorylation, also promote interactions between CycT1 and CDK9, and increase the stability of CycT1

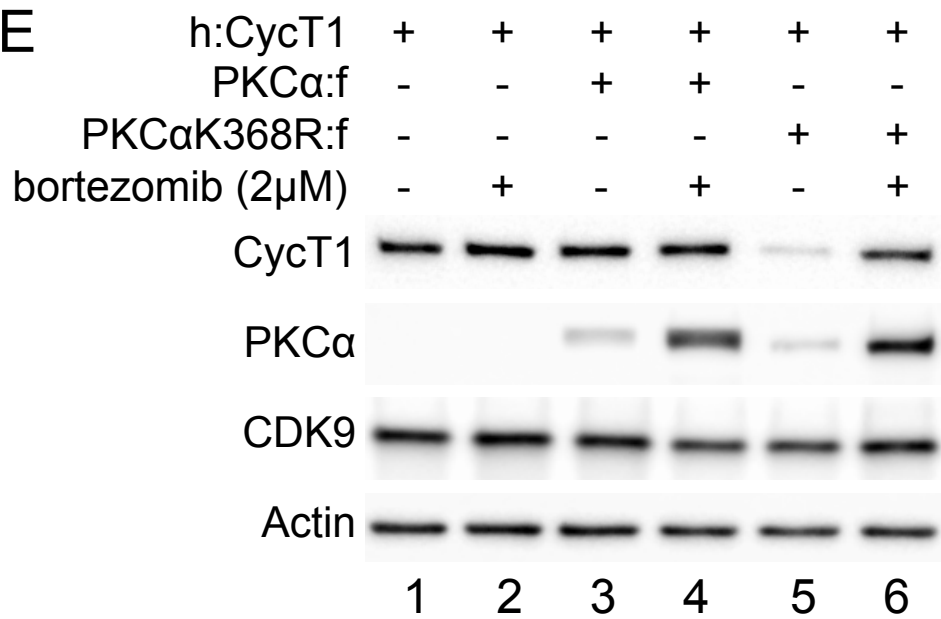

## Source blot for Figure 5F

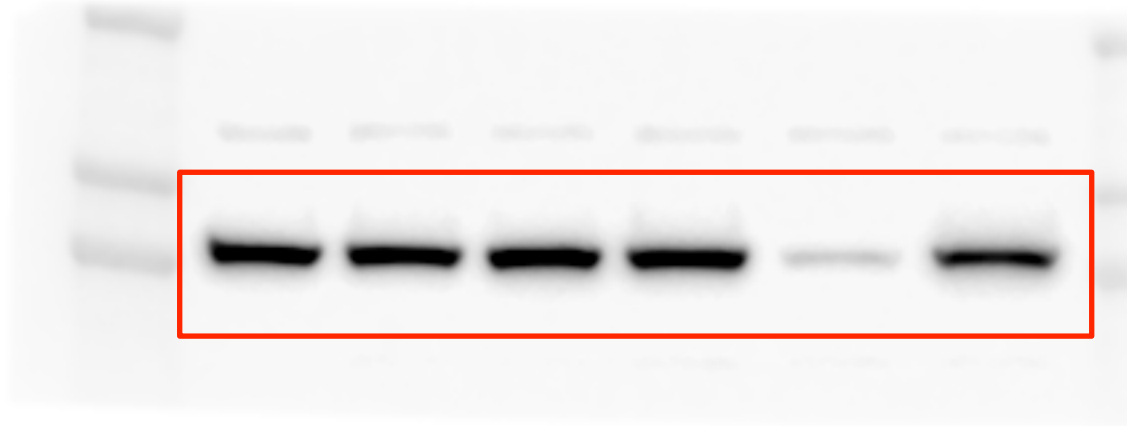

Red marked area was used for the figure.

Membrane was cut after transfer, and before probing by Ab

## Source blot for Figure 5F

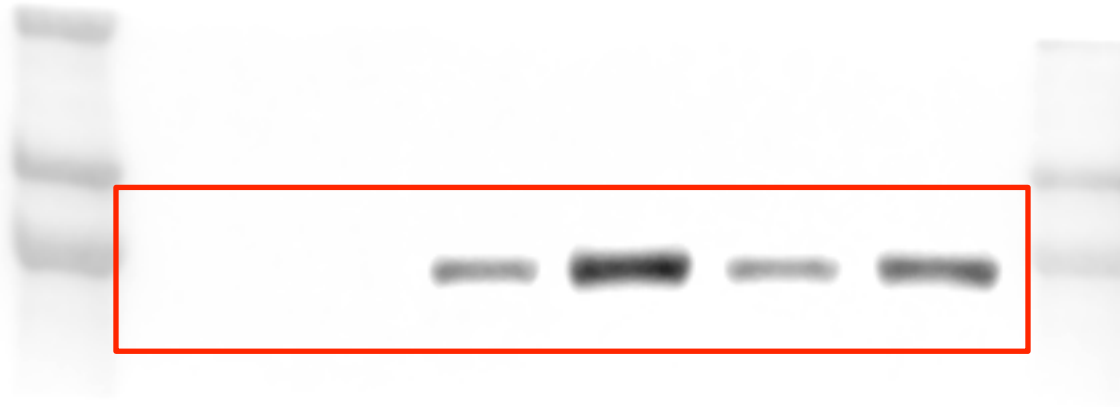

Red marked area was used for the figure.

Membrane was cut after transfer, and before probing by Ab

## Source blot for Figure 5F

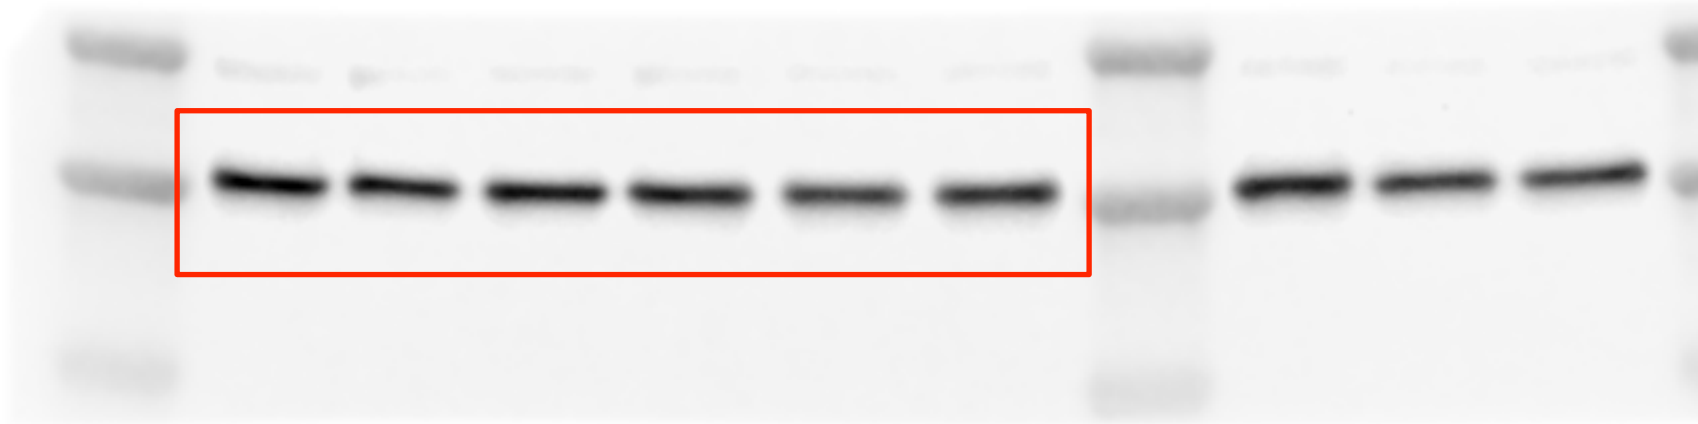

Red marked area was used for the figure.

Membrane was cut after transfer, and before probing by Ab  
Right lanes are the same proteins under different conditions

## Source blot for Figure 5F

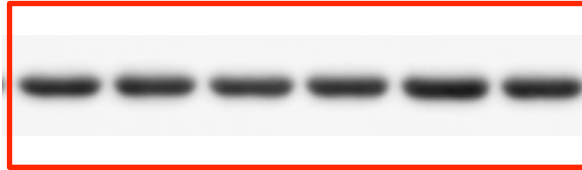

Red marked area was used for the figure.

Membrane was cut after transfer, and before probing by Ab

Fig. 5. PKC $\alpha$  and PKC $\beta$  bind to CycT1 for its phosphorylation, also promote interactions between CycT1 and CDK9, and increase the stability of CycT1

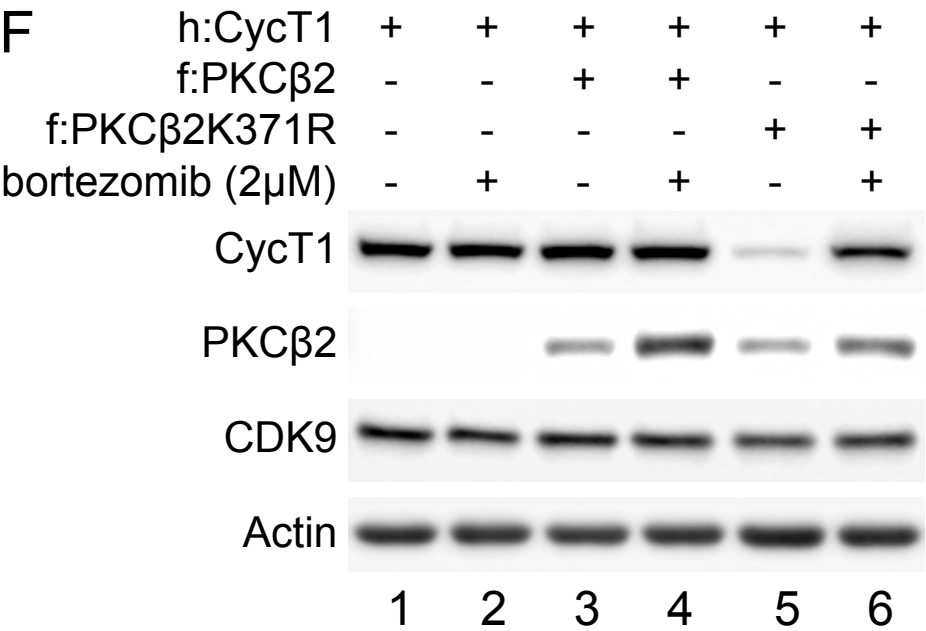

## Source blot for Figure 5G

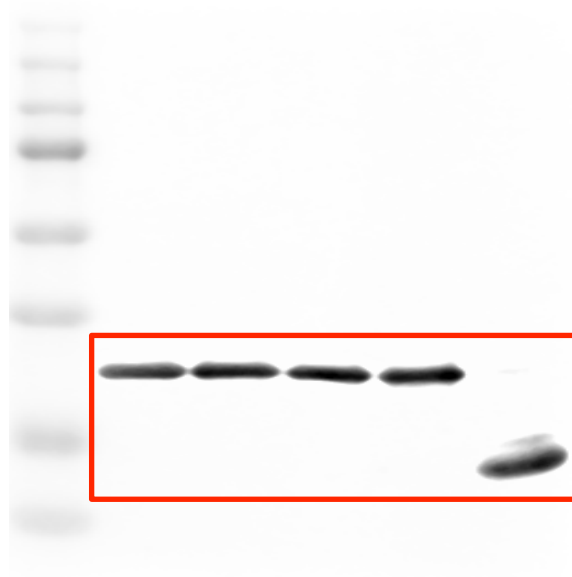

Red marked area was used for the figure.

## Source gel-staining for Figure 5G

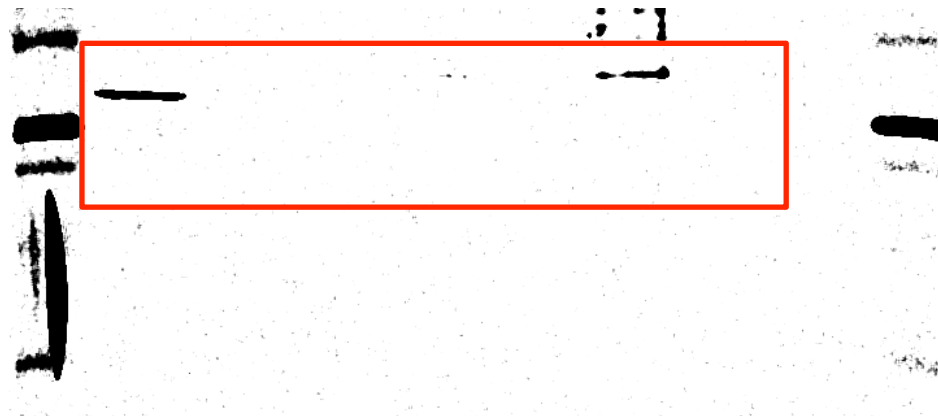

Red marked area was used for the figure.

Fig. 5. PKC $\alpha$  and PKC $\beta$  bind to CycT1 for its phosphorylation, also promote interactions between CycT1 and CDK9, and increase the stability of CycT1

G

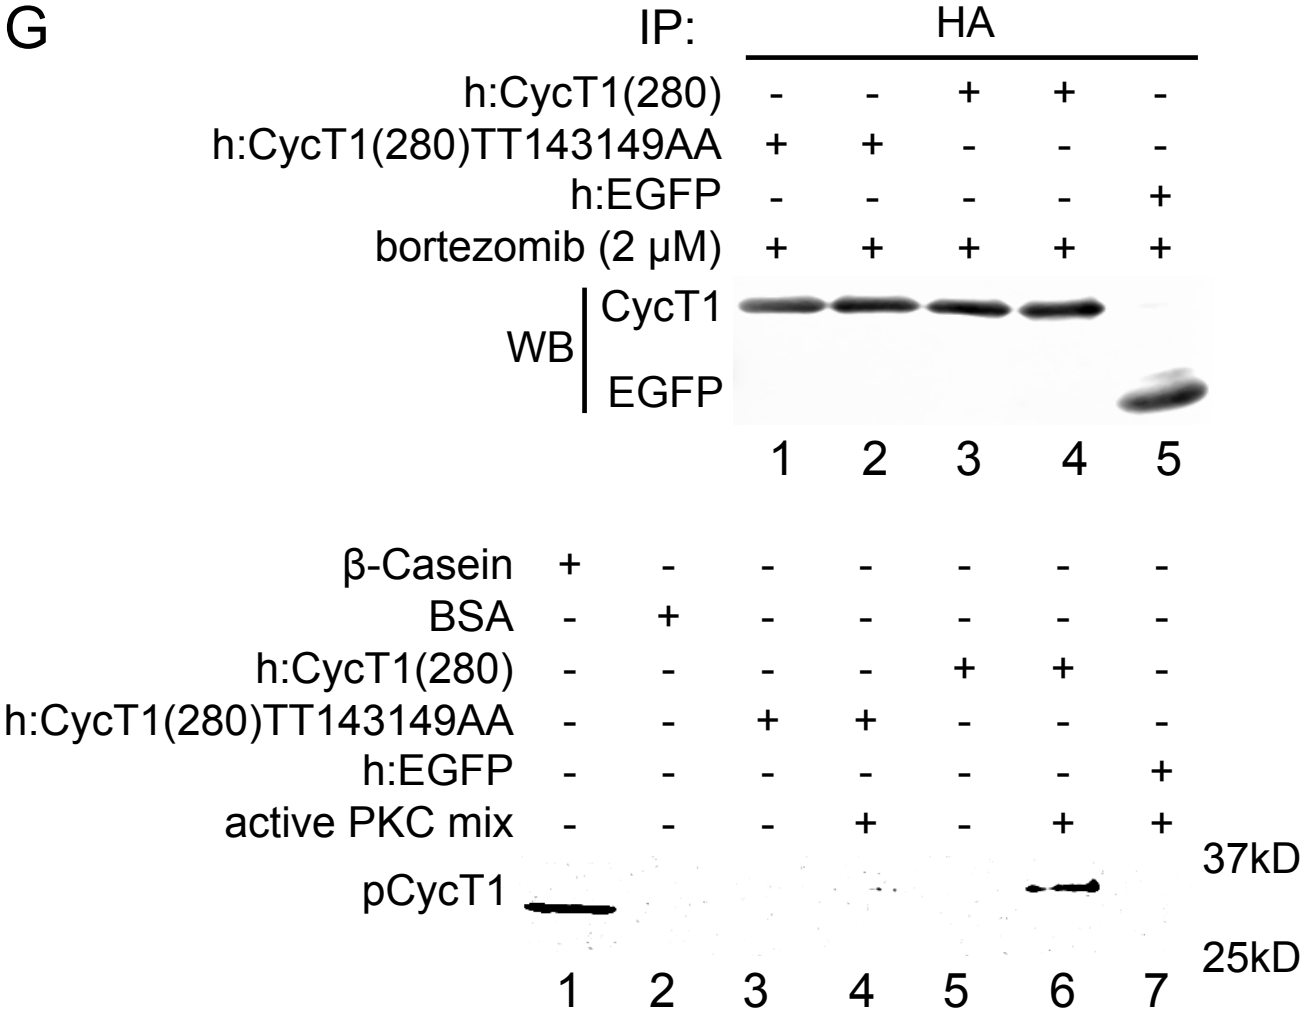

## Source blot for Figure 6A

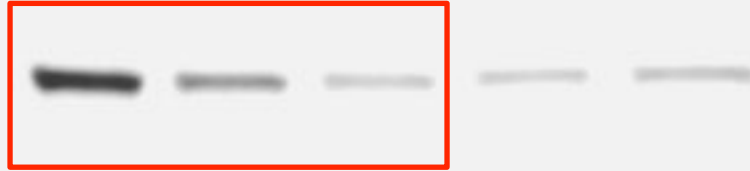

Red marked area was used for the figure.

Membrane was cut after transfer, and before probing by Ab

Right 2 lanes the same proteins under PMA treatment for 120 h and 144 h

## Source blot for Figure 6A

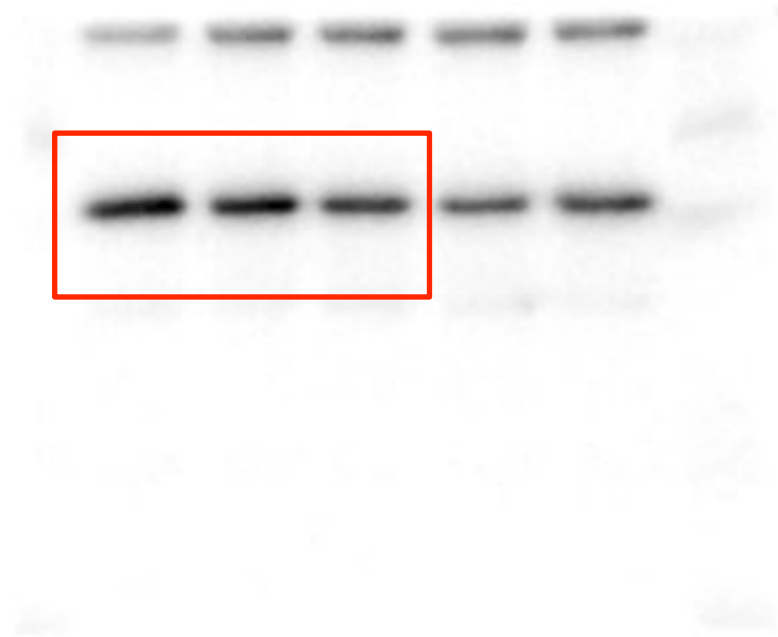

Red marked area was used for the figure.

Membrane was cut after transfer, and before probing by Ab

Right 2 lanes the same proteins under PMA treatment for 120 h and 144 h

Source blot for Figure 6A

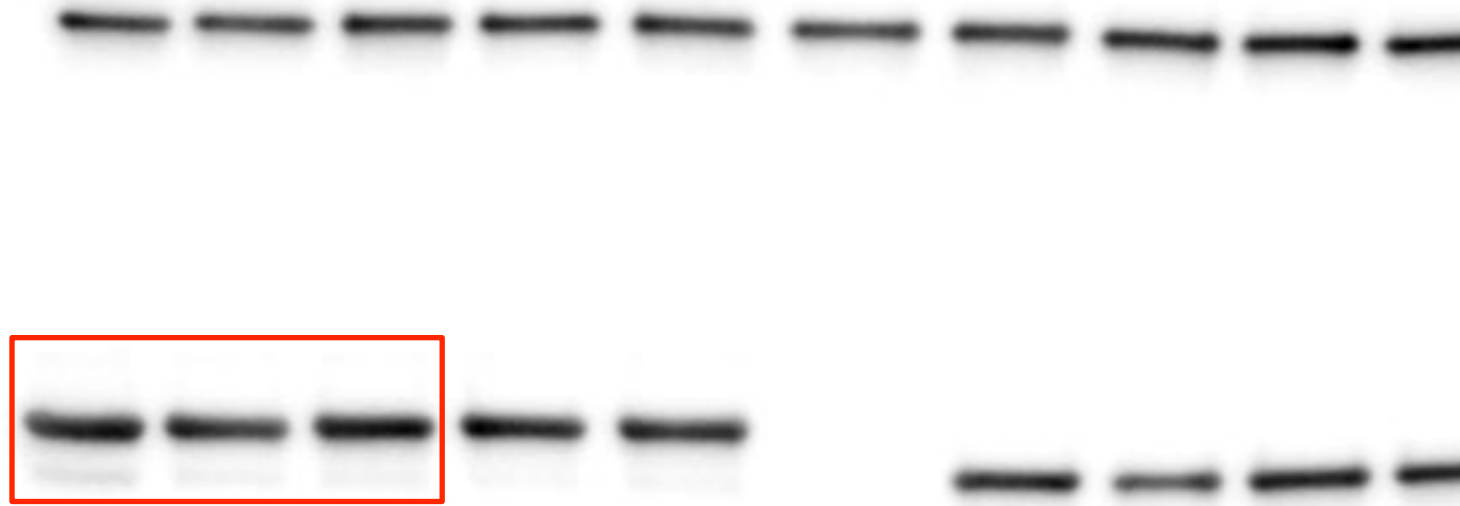

Red marked area was used for the figure.

Membrane was cut after transfer, and before probing by Ab

Right 2 lanes the same proteins under PMA treatment for 120 h and 144 h  
3 different membranes are in the same tray for imaging

Fig. 6. Depletion of PKCs leads to decreased levels of CycT1 in cell lines and primary cells

Jurkat Cells

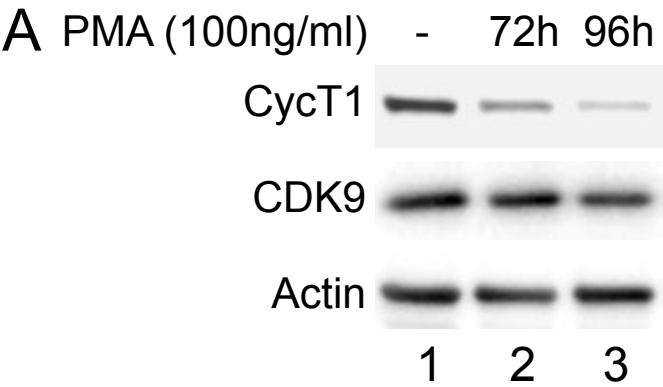

## Source blot for Figure 6B

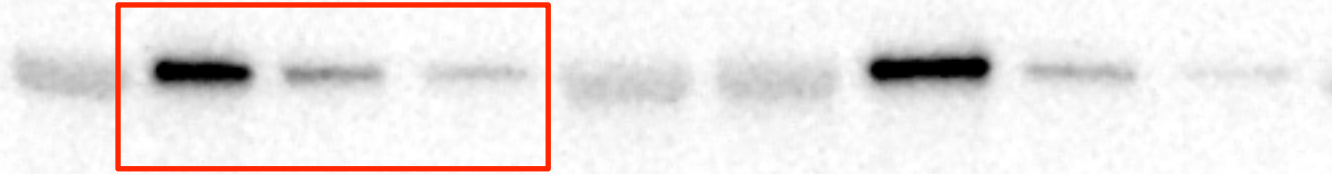

Red marked area was used for the figure.

Membrane was cut after transfer, and before probing by Ab  
Right lanes the same proteins from 2nd donor

# Source blot for Figure 6B

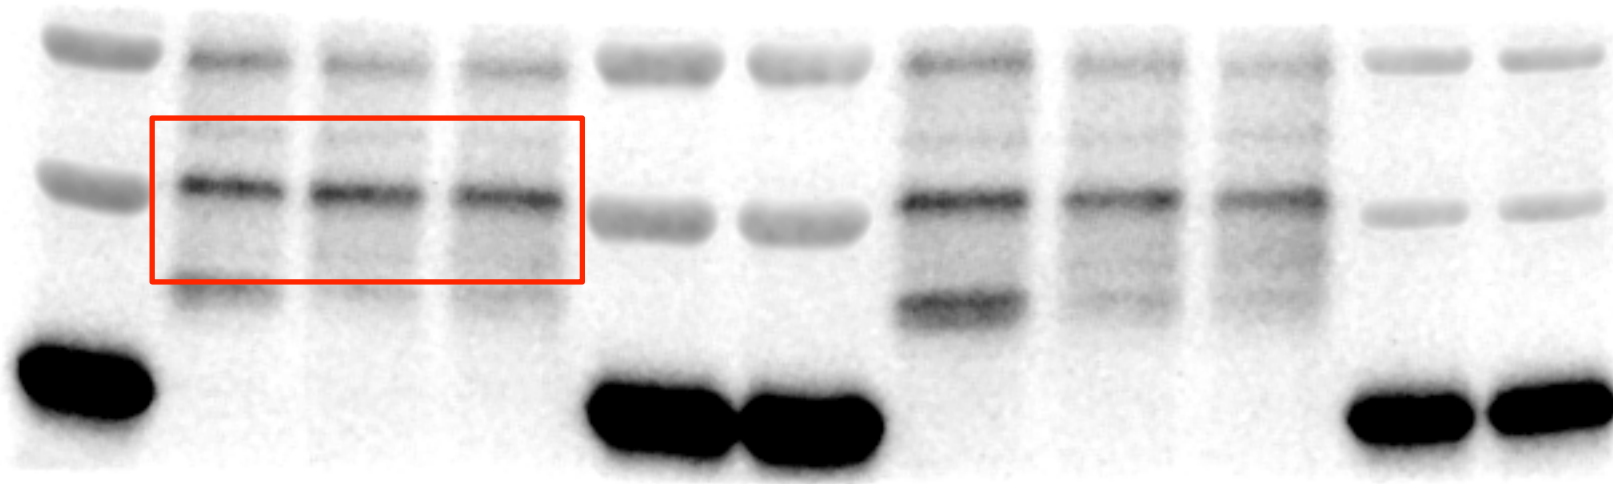

Red marked area was used for the figure.

Membrane was cut after transfer, and before probing by Ab  
Right lanes the same proteins from 2nd donor

## Source blot for Figure 6B

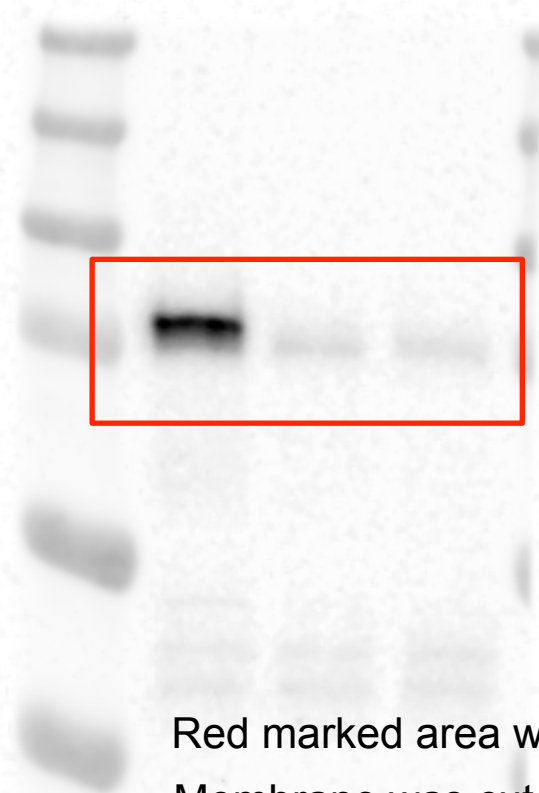

Red marked area was used for the figure.

Membrane was cut after transfer, and before probing by Ab

Source blot for Figure 6B

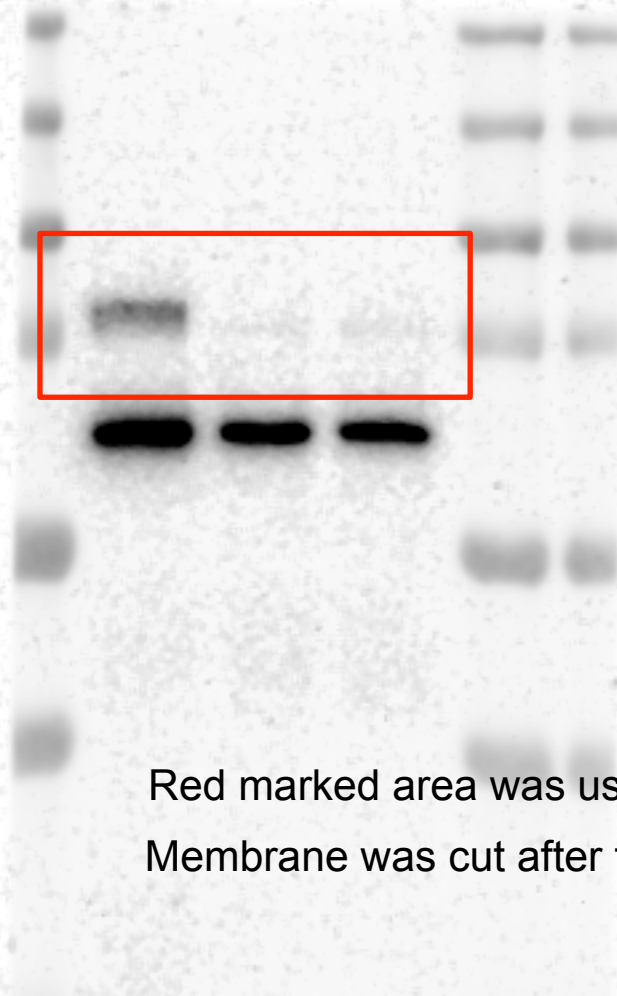

Red marked area was used for the figure.

Membrane was cut after transfer, and before probing by Ab

# Source blot for Figure 6B

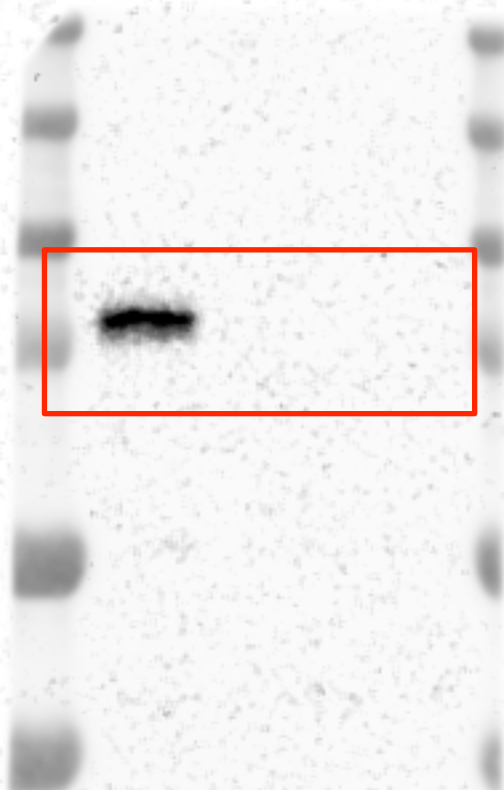

Red marked area was used for the figure.

Membrane was cut after transfer, and before probing by Ab

# Source blot for Figure 6B

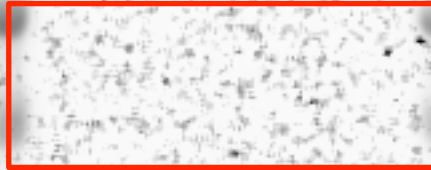

Red marked area was used for the figure.

Membrane was cut after transfer, and before probing by Ab

# Source blot for Figure 6B

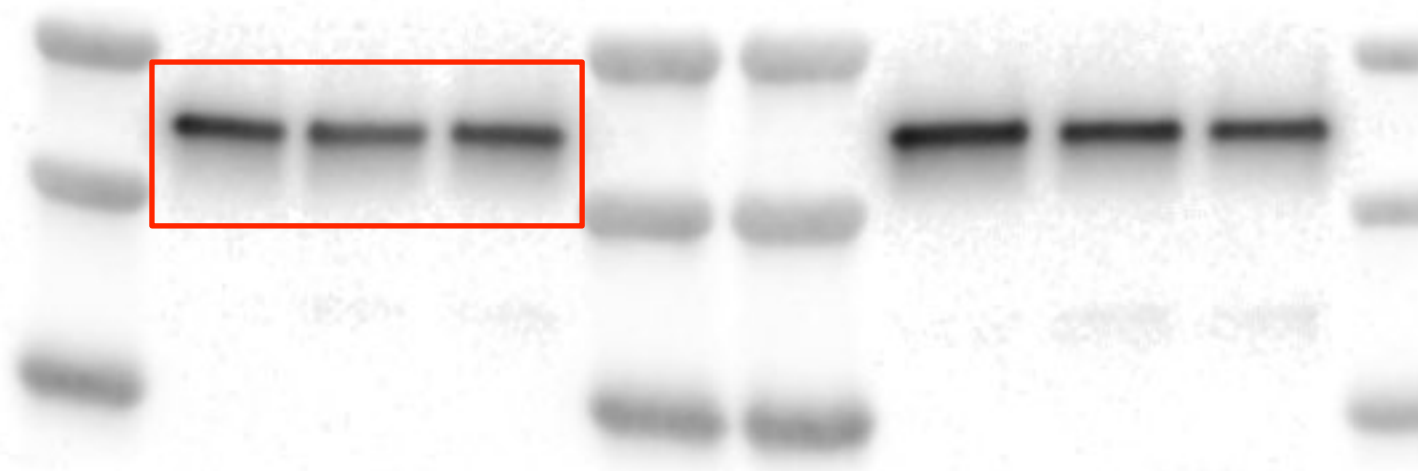

Red marked area was used for the figure.

Membrane was cut after transfer, and before probing by Ab  
Right lanes the same proteins from 2nd donor

Fig. 6. Depletion of PKCs leads to decreased levels of CycT1 in cell lines and primary cells

Activated Primary CD4+ T cells

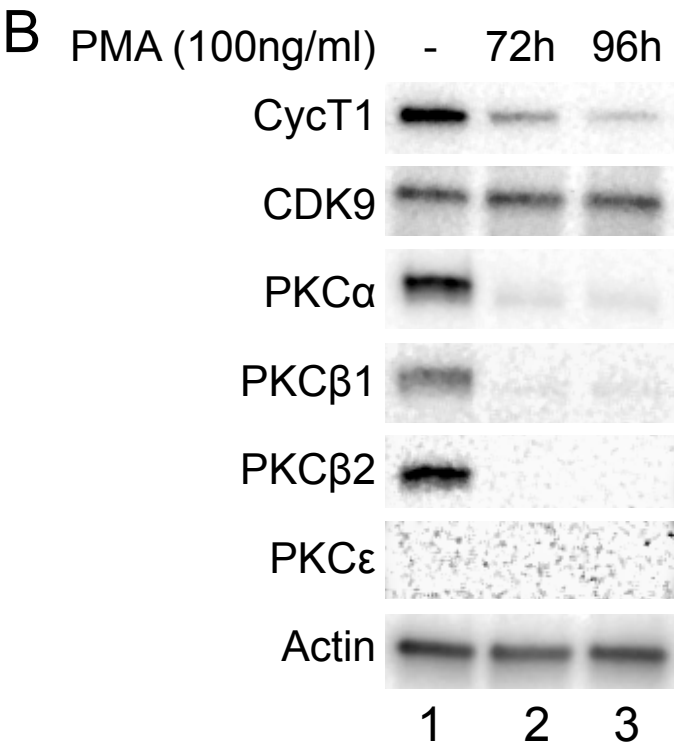

## Source blot for Figure 6C

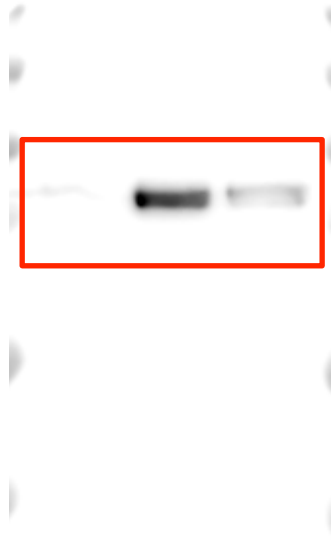

Red marked area was used for the figure.

Membrane was cut after transfer, and before probing by Ab

## Source blot for Figure 6C

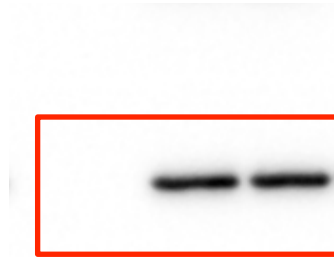

Red marked area was used for the figure.

Membrane was cut after transfer, and before probing by Ab

## Source blot for Figure 6C

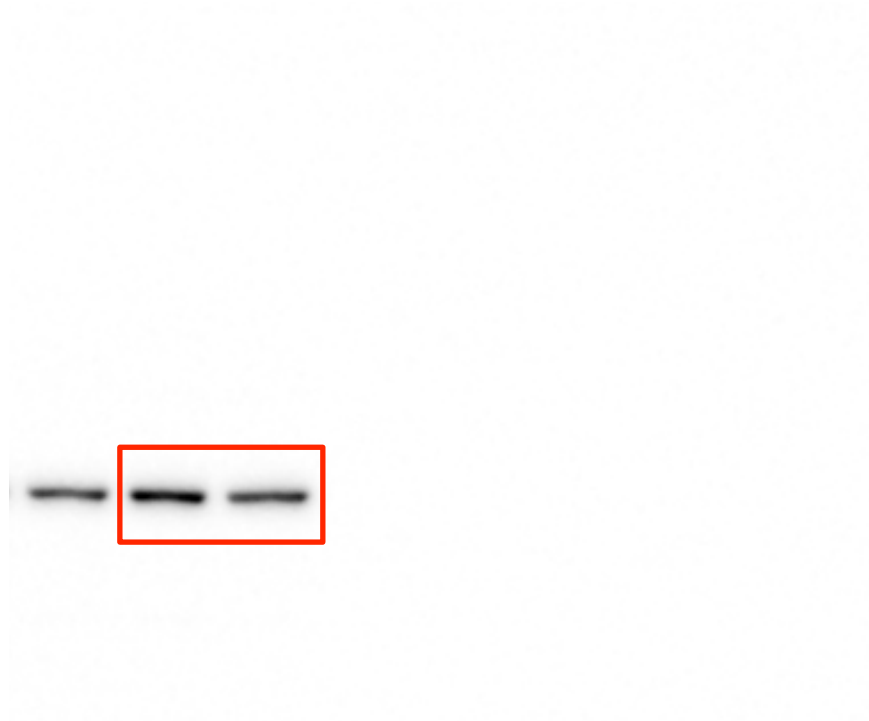

Red marked area was used for the figure.

Membrane was cut after transfer, and before probing by Ab  
Left lane is the same protein without treatment

## Source blot for Figure 6C

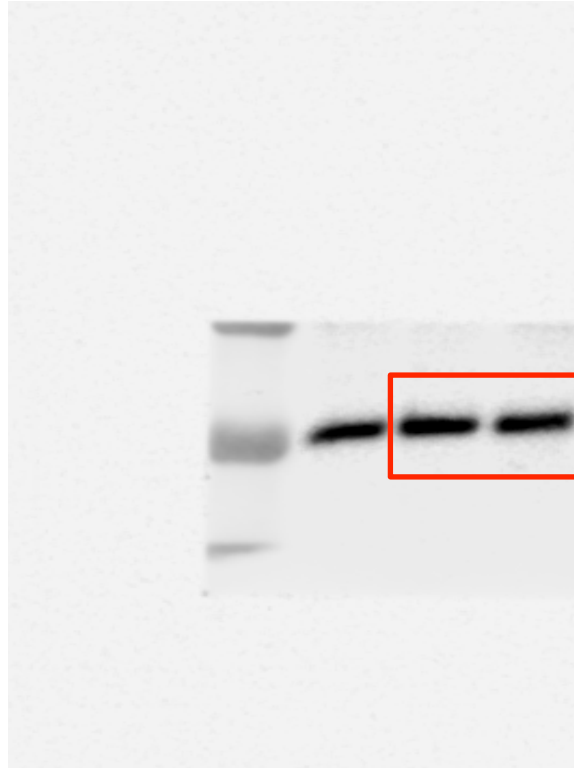

Red marked area was used for the figure.

Membrane was cut after transfer, and before probing by Ab  
Left lane is the same protein without treatment

Fig. 6. Depletion of PKCs leads to decreased levels of CycT1 in cell lines and primary cells

Activated Primary CD4+ T cells

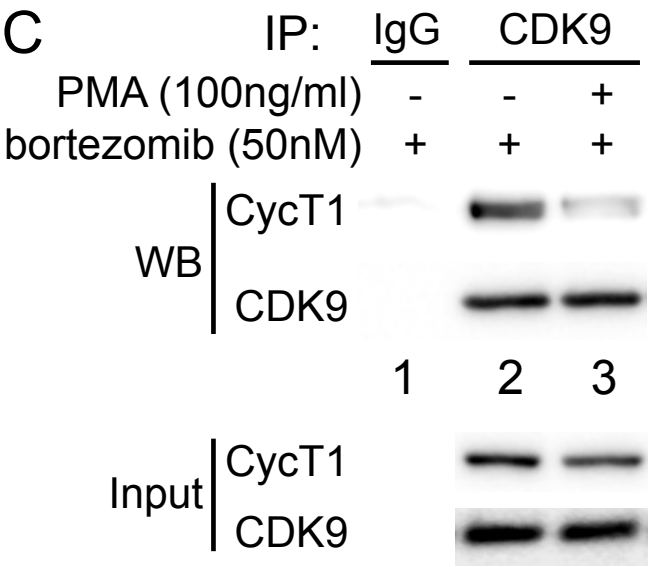

Source blot for Figure 6D

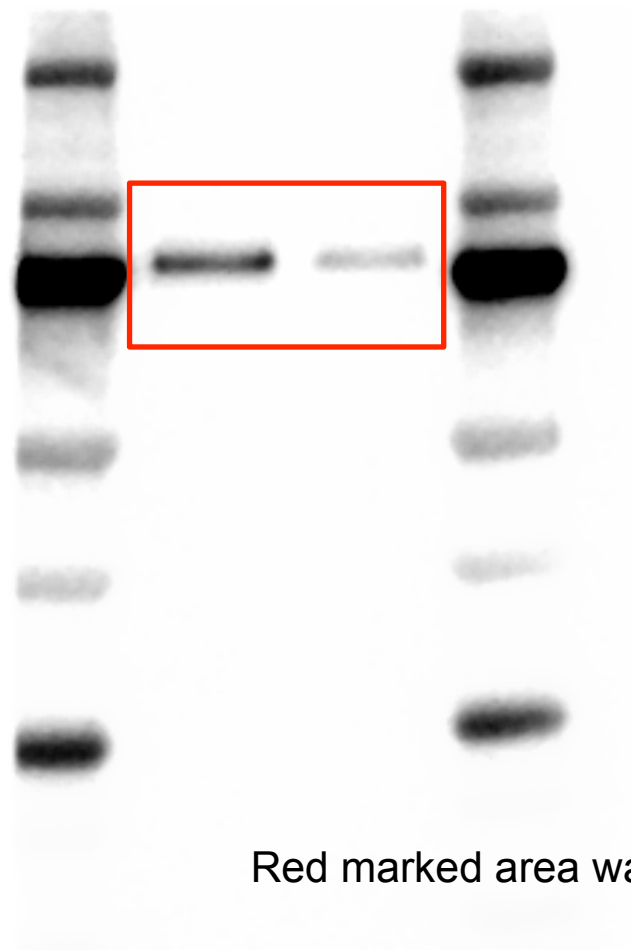

Red marked area was used for the figure.

# Source blot for Figure 6D

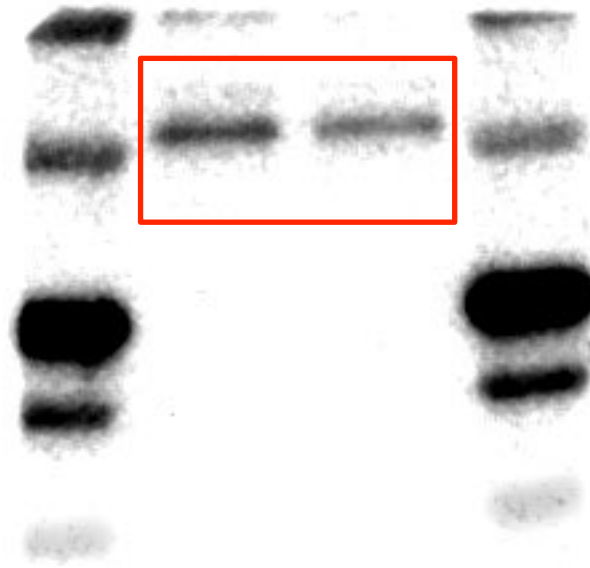

Red marked area was used for the figure.

Membrane was cut after transfer, and before probing by Ab

## Source blot for Figure 6D

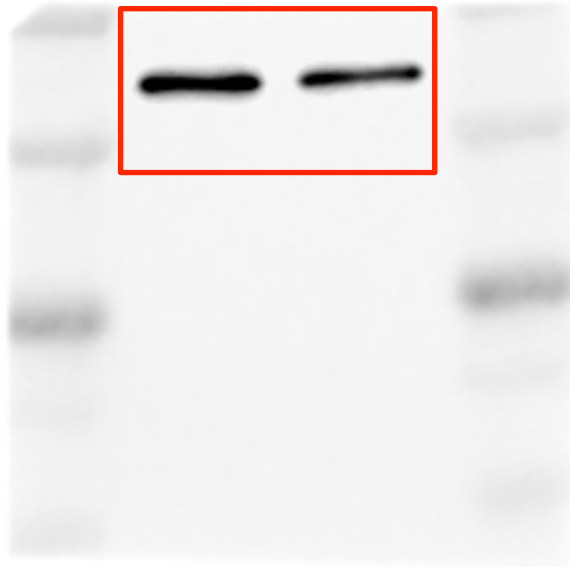

Red marked area was used for the figure.

Membrane was cut after transfer, and before probing by Ab

Fig. 6. Depletion of PKCs leads to decreased levels of CycT1 in cell lines and primary cells

Mouse anergic T cells

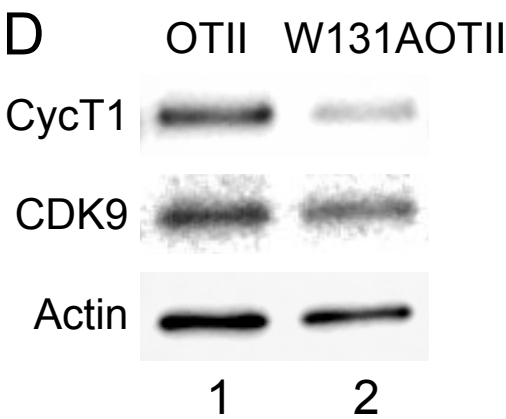

Source data for Figure 6E

| Ensembl_ID         | Gene  | Description                                          | Peripheral OT2 T cells |          |          | Peripheral W131AOT2 |          |        |
|--------------------|-------|------------------------------------------------------|------------------------|----------|----------|---------------------|----------|--------|
| ENSMUSG00000011960 | Ccnt1 | cyclin T1 [Source:MGI Symbol;Acc:MGI:1328363]        | 3808                   | 4229.6   | 4076.9   | 3608.1              | 3656.1   | 4889.9 |
| ENSMUSG00000009555 | Cdk9  | cyclin-dependent kinase 9 (CDC2-related kinase) [Sou | 4060.6                 | 4500     | 4485.6   | 4459.2              | 5112.8   | 5461.8 |
|                    |       |                                                      |                        |          |          |                     |          |        |
|                    |       | CycT1/OTII                                           | 3808                   | 4038.167 | 0.943002 | 1                   |          |        |
|                    |       |                                                      | 4229.6                 | 4038.167 | 1.047406 |                     |          |        |
|                    |       |                                                      | 4076.9                 | 4038.167 | 1.009592 |                     |          |        |
|                    |       | CycT1/W131AOTII                                      | 3608.1                 | 4038.167 | 0.8935   | 1.003269            | 0.17993  |        |
|                    |       |                                                      | 3656.1                 | 4038.167 | 0.905386 |                     |          |        |
|                    |       |                                                      | 4889.9                 | 4038.167 | 1.210921 |                     |          |        |
|                    |       |                                                      |                        |          |          |                     |          |        |
|                    |       |                                                      |                        |          |          |                     |          |        |
|                    |       | CDK9/OTII                                            | 4060.6                 | 4348.733 | 0.933743 | 1                   |          |        |
|                    |       |                                                      | 4500                   | 4348.733 | 1.034784 |                     |          |        |
|                    |       |                                                      | 4485.6                 | 4348.733 | 1.031473 |                     |          |        |
|                    |       | CDK9/W131AOTII                                       | 4459.2                 | 4348.733 | 1.025402 | 1.152351            | 0.117035 |        |
|                    |       |                                                      | 5112.8                 | 4348.733 | 1.175699 |                     |          |        |
|                    |       |                                                      | 5461.8                 | 4348.733 | 1.255952 |                     |          |        |

|                 |          |          |
|-----------------|----------|----------|
| CycT1/OTII      | 1        | 0        |
| CycT1/W131AOTII | 1.003269 | 0.17993  |
| CDK9/OTII       | 1        | 0        |
| CDK9/W131AOTII  | 1.152351 | 0.117035 |

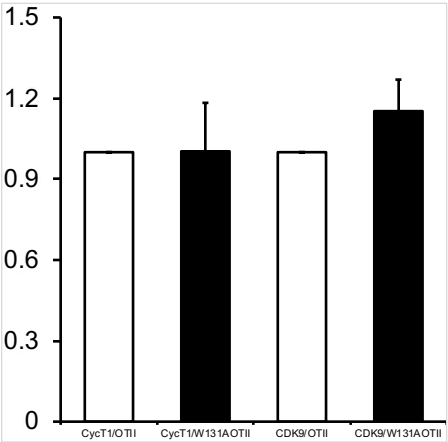

Fig. 6. Depletion of PKCs leads to decreased levels of CycT1 in cell lines and primary cells

Mouse anergic T cells

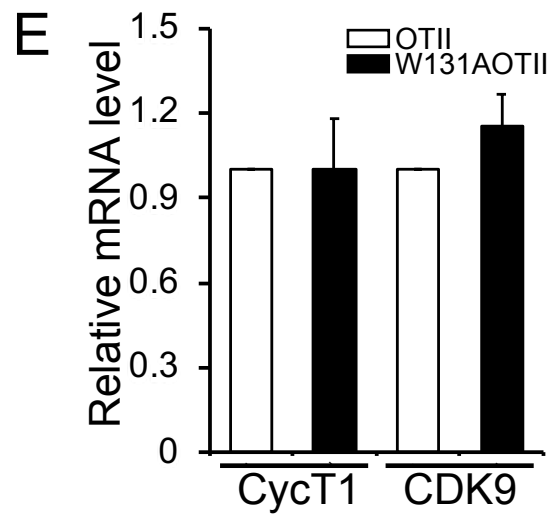

## Source blot for Figure 6F

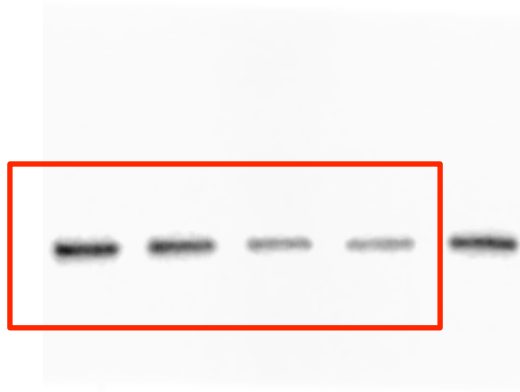

Red marked area was used for the figure.

Membrane was cut after transfer, and before probing by Ab  
Right lane is the same protein without treatment, same as lane 1

## Source blot for Figure 6F

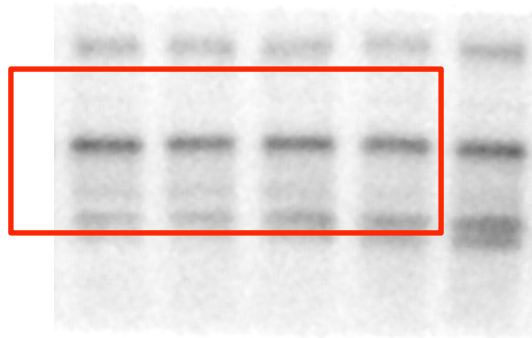

Red marked area was used for the figure.

Membrane was cut after transfer, and before probing by Ab  
Right lane is the same protein without treatment, same as lane 1

## Source blot for Figure 6F

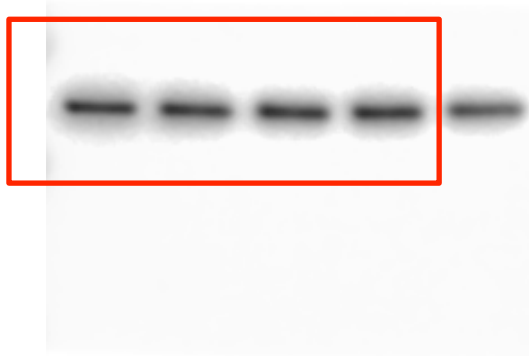

Red marked area was used for the figure.

Membrane was cut after transfer, and before probing by Ab  
Right lane is the same protein without treatment, same as lane 1

Fig. 6. Depletion of PKCs leads to decreased levels of CycT1 in cell lines and primary cells

Activated Primary CD4+ T cells

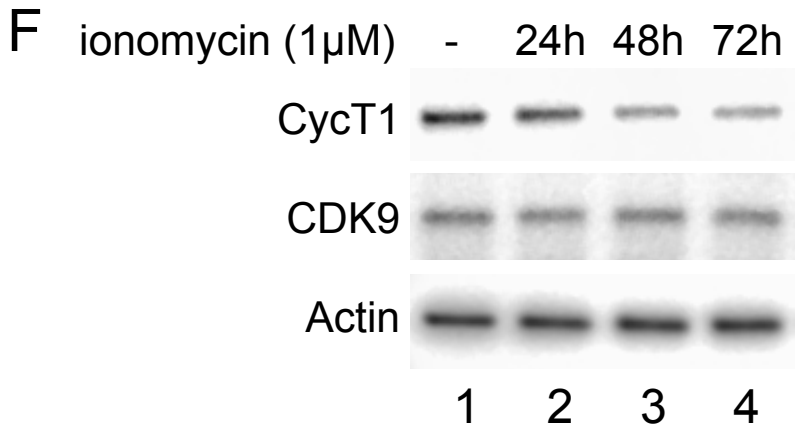

Figure supplement 1. Thr143 and T149 are the phosphorylated residues in CycT1

A

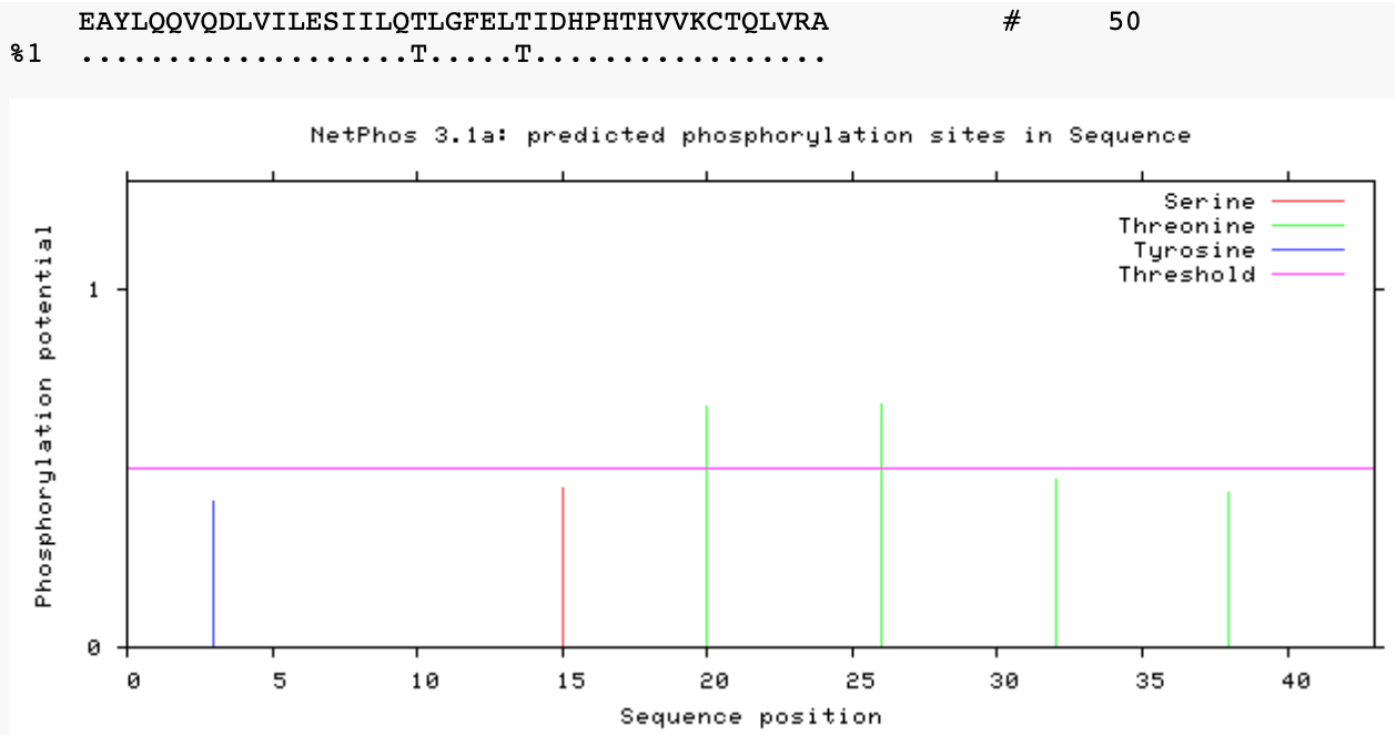

```
>Sequence      43 amino acids
#
# netphos-3.1b prediction results
#
# Sequence      # x Context      Score Kinase      Answer
#-----
# Sequence      3 Y --EAYLQQV 0.409 EGFR      .
# Sequence      3 Y --EAYLQQV 0.360 INSR      .
# Sequence      3 Y --EAYLQQV 0.343 unsp      .
# Sequence      3 Y --EAYLQQV 0.313 SRC       .
#
# Sequence      15 S VILESIILO 0.445 CaM-II  .
# Sequence      15 S VILESIILO 0.443 PKC      .
# Sequence      15 S VILESIILO 0.429 GSK3     .
# Sequence      15 S VILESIILO 0.414 CKII     .
# Sequence      15 S VILESIILO 0.413 PKA      .
# Sequence      15 S VILESIILO 0.387 CKI      .
# Sequence      15 S VILESIILO 0.363 cdc2     .
# Sequence      15 S VILESIILO 0.345 DNAPK    .
# Sequence      15 S VILESIILO 0.331 p38MAPK   .
# Sequence      15 S VILESIILO 0.307 RSK      .
# Sequence      15 S VILESIILO 0.266 ATM      .
# Sequence      15 S VILESIILO 0.252 PKG      .
# Sequence      15 S VILESIILO 0.124 cdk5     .
# Sequence      15 S VILESIILO 0.076 PKB      .
# Sequence      15 S VILESIILO 0.008 unsp     .
#
# Sequence      20 T IILQTLGFE 0.672 PKC      YES
# Sequence      20 T IILQTLGFE 0.463 cdc2     .
# Sequence      20 T IILQTLGFE 0.437 PKA      .
# Sequence      20 T IILQTLGFE 0.436 GSK3     .
# Sequence      20 T IILQTLGFE 0.423 CaM-II  .
# Sequence      20 T IILQTLGFE 0.374 CKI      .
# Sequence      20 T IILQTLGFE 0.371 CKII     .
# Sequence      20 T IILQTLGFE 0.350 DNAPK    .
# Sequence      20 T IILQTLGFE 0.313 p38MAPK   .
# Sequence      20 T IILQTLGFE 0.236 ATM      .
# Sequence      20 T IILQTLGFE 0.228 PKG      .
# Sequence      20 T IILQTLGFE 0.220 RSK      .
# Sequence      20 T IILQTLGFE 0.161 cdk5     .
# Sequence      20 T IILQTLGFE 0.089 PKB      .
# Sequence      20 T IILQTLGFE 0.049 unsp     .
#
# Sequence      26 T GFELTIDHP 0.680 unsp     YES
# Sequence      26 T GFELTIDHP 0.553 CKI      YES
# Sequence      26 T GFELTIDHP 0.457 CaM-II  .
# Sequence      26 T GFELTIDHP 0.434 GSK3     .
# Sequence      26 T GFELTIDHP 0.420 cdc2     .
# Sequence      26 T GFELTIDHP 0.400 CKII     .
# Sequence      26 T GFELTIDHP 0.349 DNAPK    .
# Sequence      26 T GFELTIDHP 0.338 p38MAPK   .
# Sequence      26 T GFELTIDHP 0.258 ATM      .
# Sequence      26 T GFELTIDHP 0.246 PKG      .
# Sequence      26 T GFELTIDHP 0.226 RSK      .
# Sequence      26 T GFELTIDHP 0.182 cdk5     .
# Sequence      26 T GFELTIDHP 0.150 PKC      .
# Sequence      26 T GFELTIDHP 0.130 PKA      .
# Sequence      26 T GFELTIDHP 0.085 PKB      .
#
# Sequence      32 T DHPHTHVVK 0.468 GSK3     .
# Sequence      32 T DHPHTHVVK 0.405 cdc2     .
# Sequence      32 T DHPHTHVVK 0.404 CaM-II  .
# Sequence      32 T DHPHTHVVK 0.400 p38MAPK   .
# Sequence      32 T DHPHTHVVK 0.382 CKI      .
# Sequence      32 T DHPHTHVVK 0.373 CKII     .
# Sequence      32 T DHPHTHVVK 0.343 DNAPK    .
# Sequence      32 T DHPHTHVVK 0.282 unsp     .
# Sequence      32 T DHPHTHVVK 0.243 ATM      .
# Sequence      32 T DHPHTHVVK 0.242 PKG      .
# Sequence      32 T DHPHTHVVK 0.231 RSK      .
# Sequence      32 T DHPHTHVVK 0.200 cdk5     .
# Sequence      32 T DHPHTHVVK 0.195 PKC      .
# Sequence      32 T DHPHTHVVK 0.108 PKA      .
# Sequence      32 T DHPHTHVVK 0.080 PKB      .
#
# Sequence      38 T VVKCTQLVR 0.431 ATM      .
# Sequence      38 T VVKCTQLVR 0.423 GSK3     .
# Sequence      38 T VVKCTQLVR 0.423 PKG      .
# Sequence      38 T VVKCTQLVR 0.413 CaM-II  .
# Sequence      38 T VVKCTQLVR 0.402 p38MAPK   .
# Sequence      38 T VVKCTQLVR 0.376 cdc2     .
# Sequence      38 T VVKCTQLVR 0.373 DNAPK    .
# Sequence      38 T VVKCTQLVR 0.361 CKI      .
# Sequence      38 T VVKCTQLVR 0.324 CKII     .
# Sequence      38 T VVKCTQLVR 0.263 PKC      .
# Sequence      38 T VVKCTQLVR 0.231 RSK      .
# Sequence      38 T VVKCTQLVR 0.216 PKA      .
# Sequence      38 T VVKCTQLVR 0.175 cdk5     .
# Sequence      38 T VVKCTQLVR 0.079 PKB      .
# Sequence      38 T VVKCTQLVR 0.026 unsp     .
#
# EAYLQQVDLVILESIILOTLGFEIDHPHTHVVKCTQLVRA      #      50
%1 .....T.....T.....
```

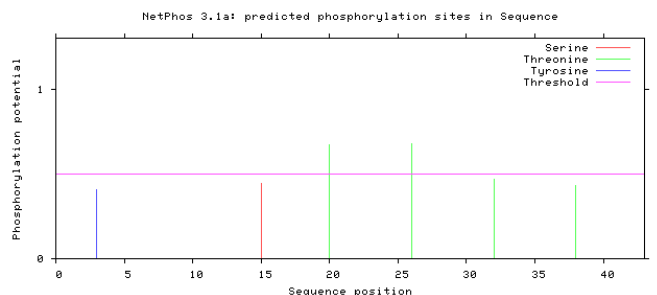

## Source blot for Figure supplement 1B

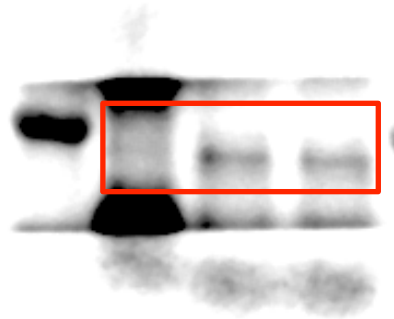

Red marked area was used for the figure.

Membrane was cut after transfer, and before probing by Ab

## Source blot for Figure supplement 1B

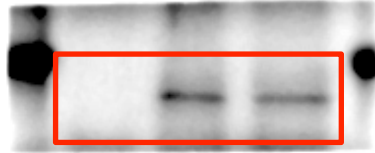

Red marked area was used for the figure.

Membrane was cut after transfer, and before probing by Ab

Fig. S1.

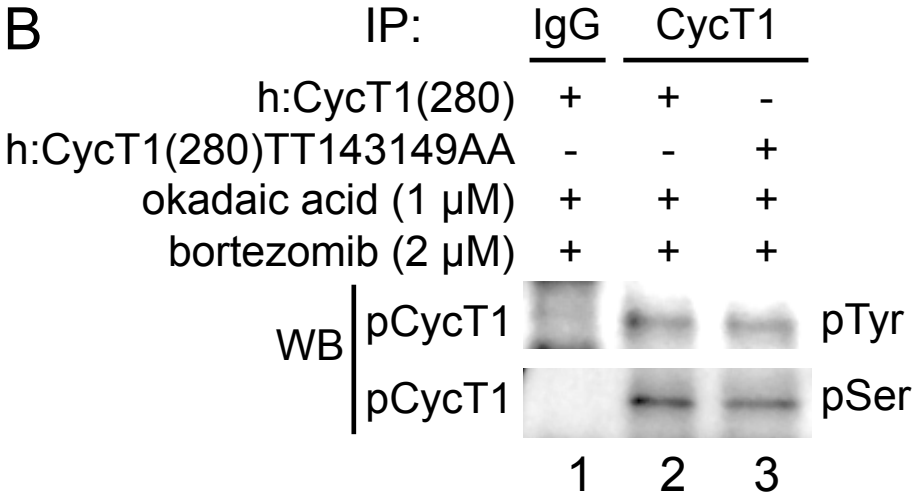

# Source blot for Figure supplement 1C

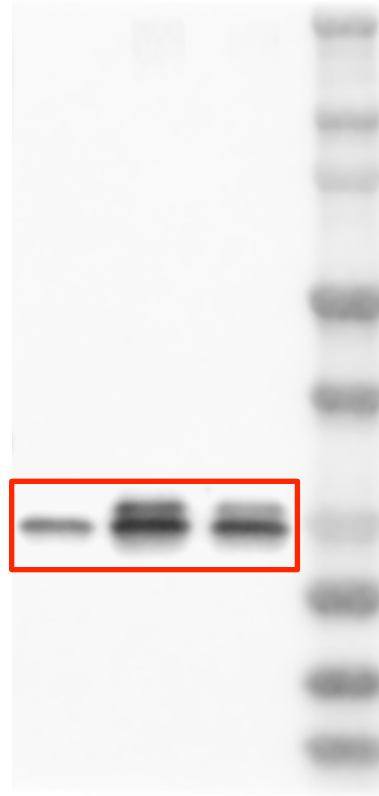

Red marked area was used for the figure.

Membrane was cut after transfer, and before probing by Ab

Fig. S1.

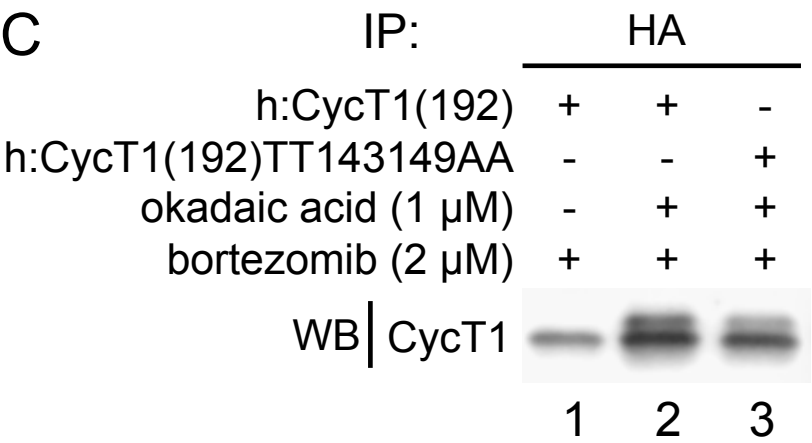

Source blot for Figure supplement 2A

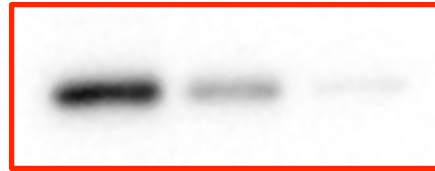

Red marked area was used for the figure.

Membrane was cut after transfer, and before probing by Ab

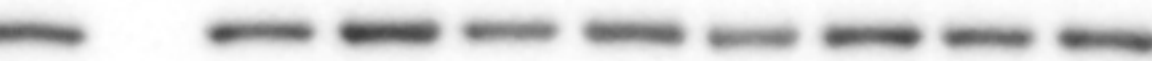

Source blot for Figure supplement 2A

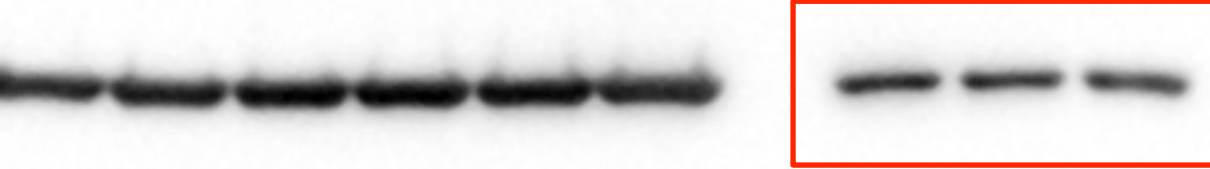

Red marked area was used for the figure.

Membrane was cut after transfer, and before probing by Ab  
Two different cut membranes are in the same tray for imaging

Fig. S2. PKC inhibitors promote CycT1 degradation in different cells

293T Cells

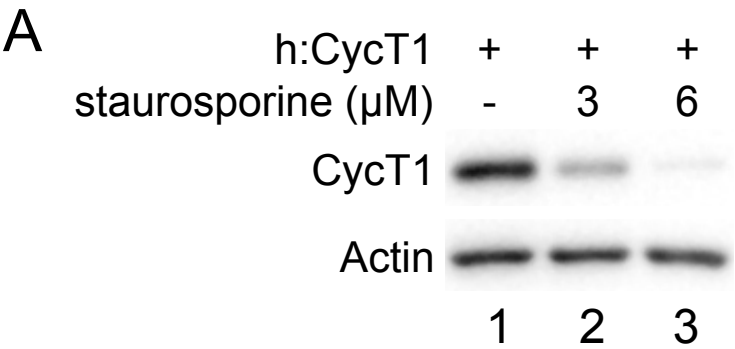

## Source blot for Figure supplement 2B

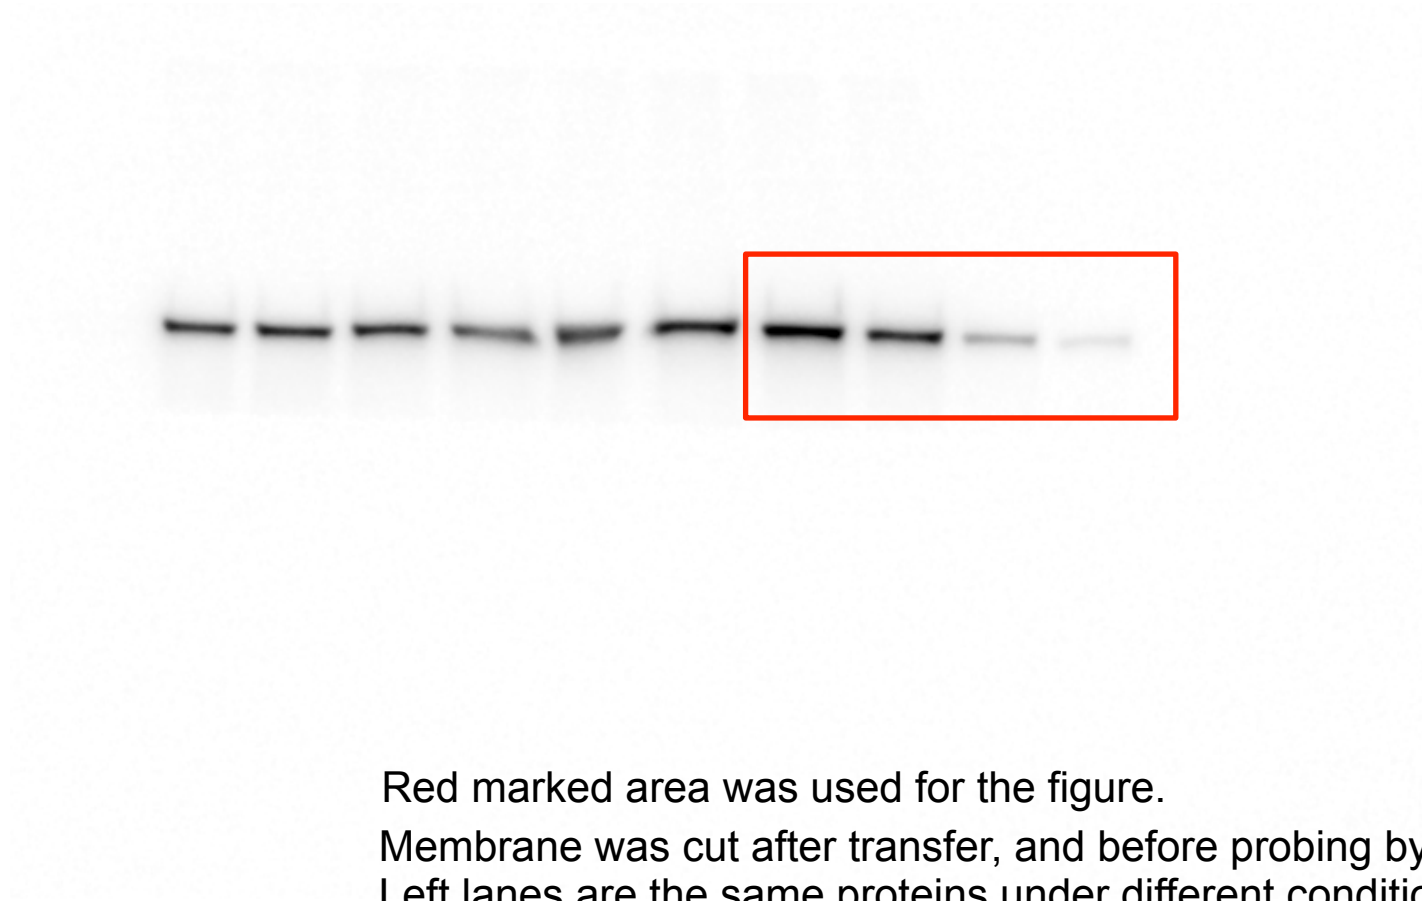

Red marked area was used for the figure.

Membrane was cut after transfer, and before probing by Ab  
Left lanes are the same proteins under different conditions

## Source blot for Figure supplement 2B

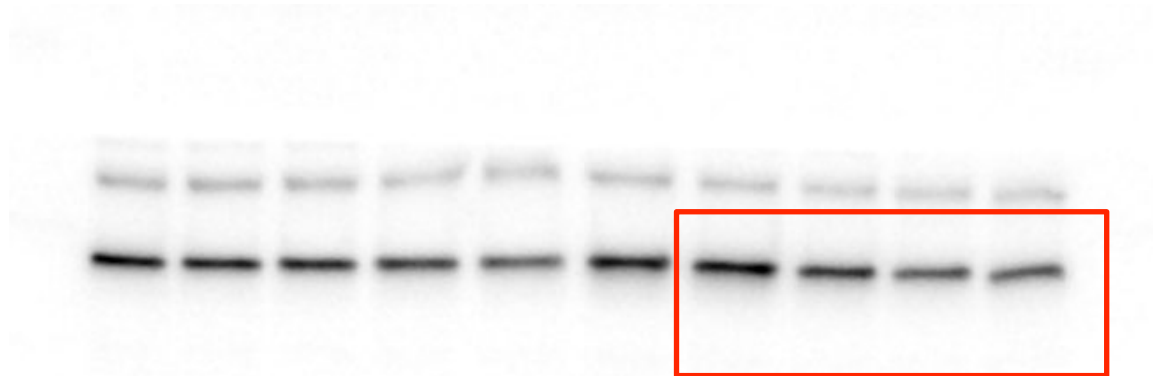

Red marked area was used for the figure.

Membrane was cut after transfer, and before probing by Ab  
Left lanes are the same proteins under different conditions

## Source blot for Figure supplement 2B

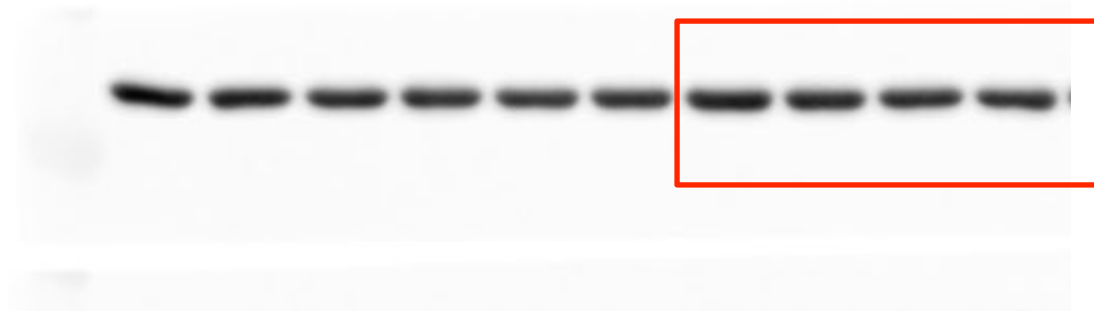

Red marked area was used for the figure.

Membrane was cut after transfer, and before probing by Ab  
Left lanes are the same proteins under different conditions

Fig. S2. PKC inhibitors promote CycT1 degradation in different cells

Jurkat Cells

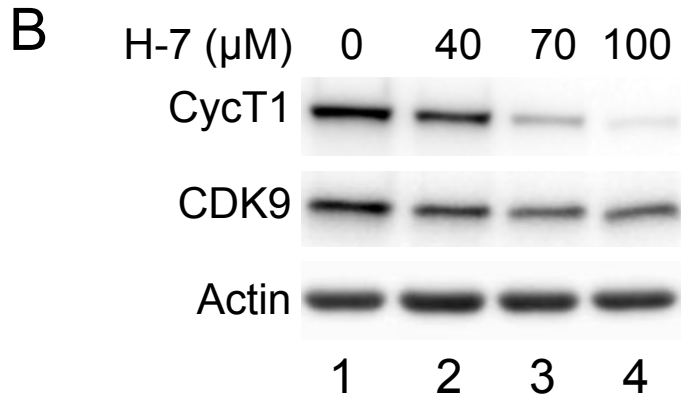

## Source blot for Figure supplement 2C

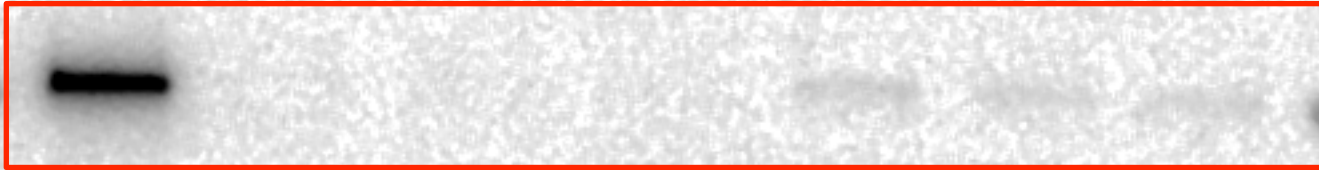

Red marked area was used for the figure.  
Membrane was cut after transfer, and before probing by Ab

# Source blot for Figure supplement 2C

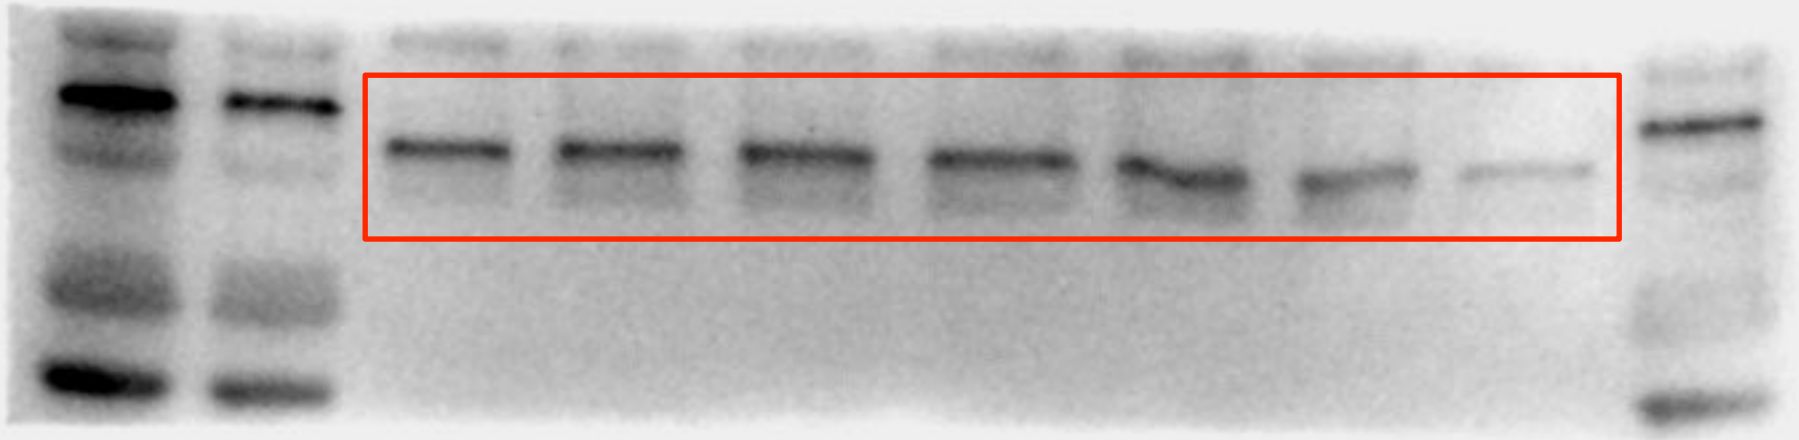

Red marked area was used for the figure.

Membrane was cut after transfer, and before probing by Ab

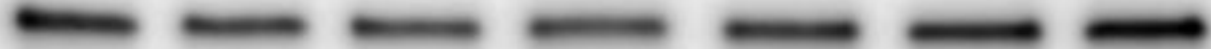

Source blot for Figure supplement 2C

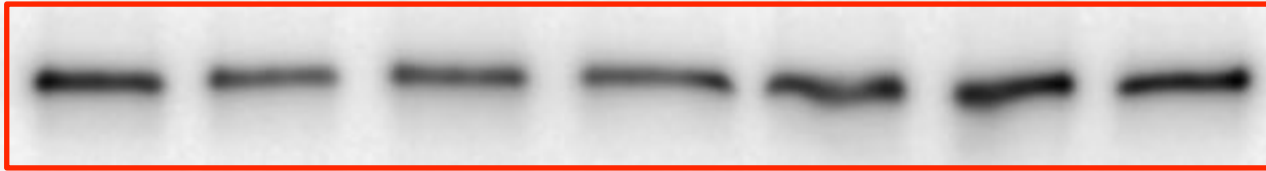

Red marked area was used for the figure.

Membrane was cut after transfer, and before probing by Ab  
Two different cut membranes are in the same tray for imaging

Fig. S2. PKC inhibitors promote CycT1 degradation in different cells

Activated Primary CD4+ T cells

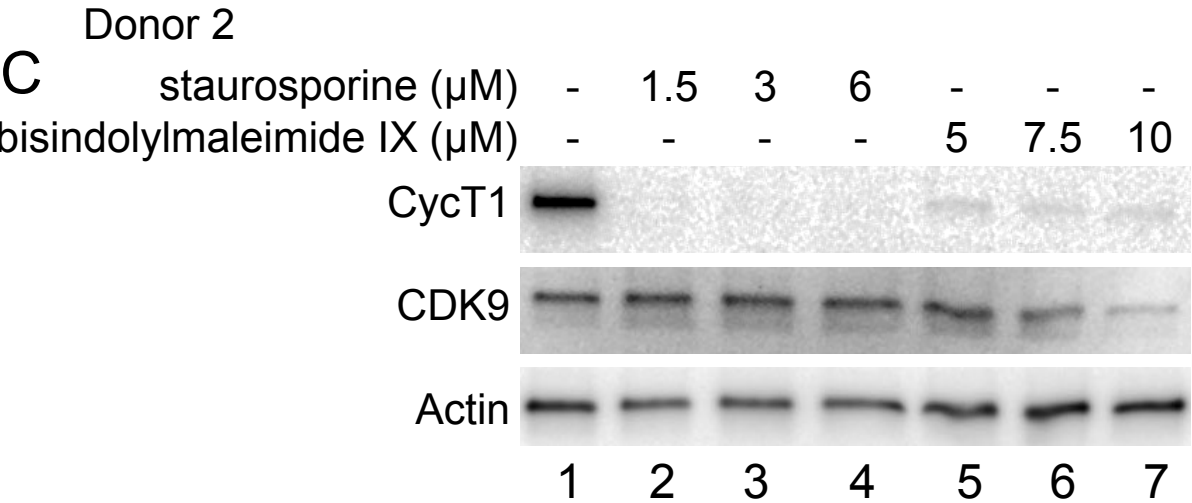

# Source blot for Figure supplement 2D

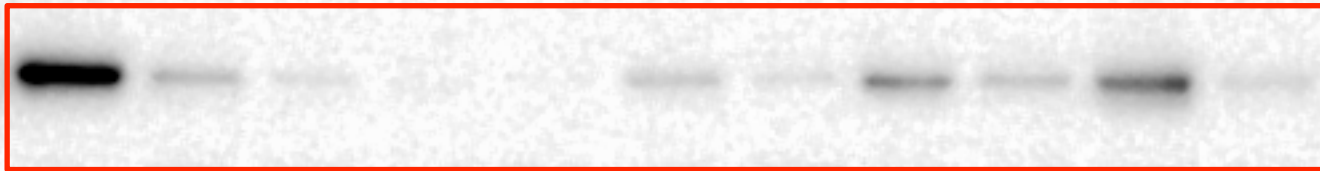

Red marked area was used for the figure.  
Membrane was cut after transfer, and before probing by Ab

# Source blot for Figure supplement 2D

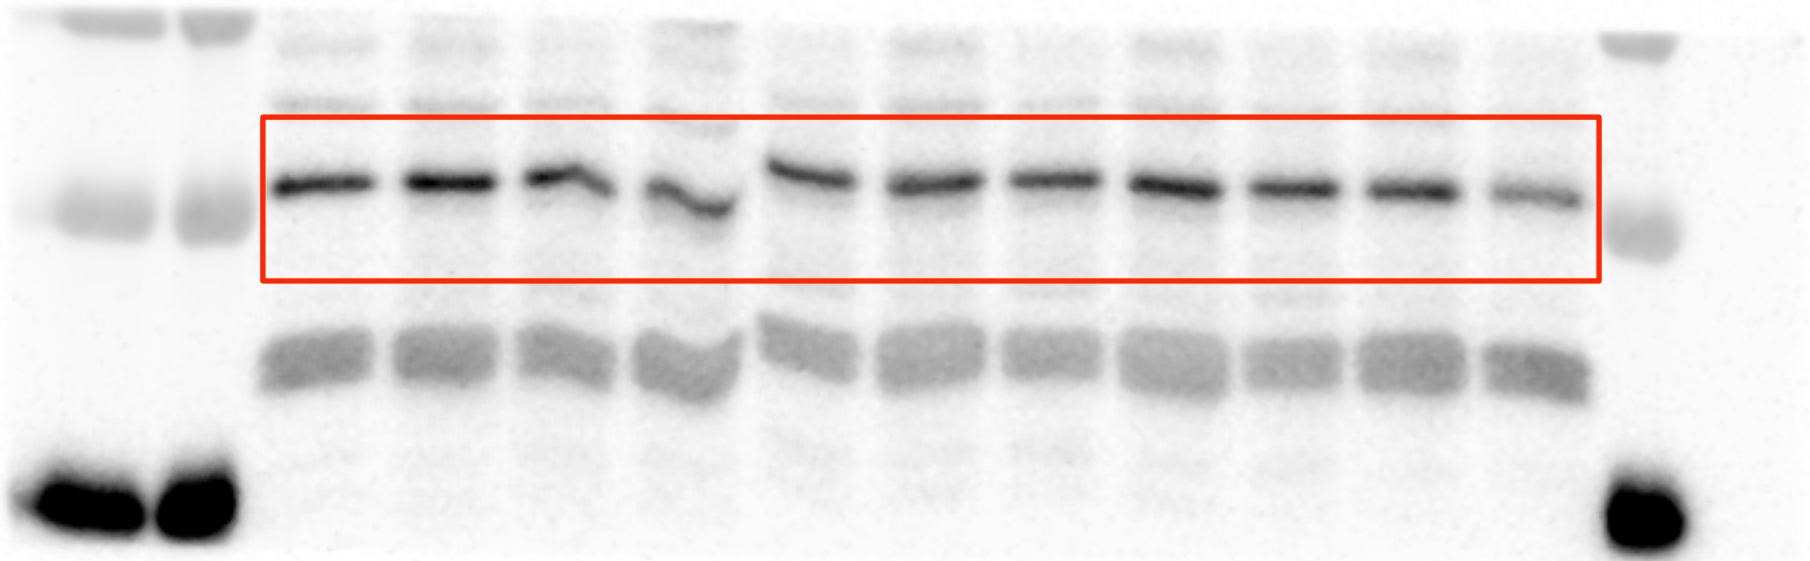

Red marked area was used for the figure.

Membrane was cut after transfer, and before probing by Ab

Source blot for Figure supplement 2D

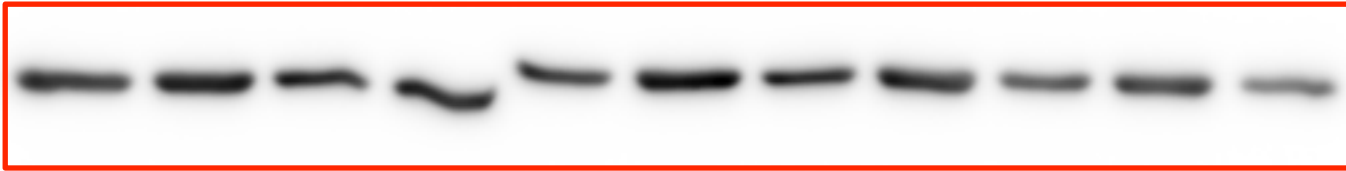

Red marked area was used for the figure.

Membrane was cut after transfer, and before probing by Ab

Fig. S2. PKC inhibitors promote CycT1 degradation in different cells

Activated Primary CD4+ T cells

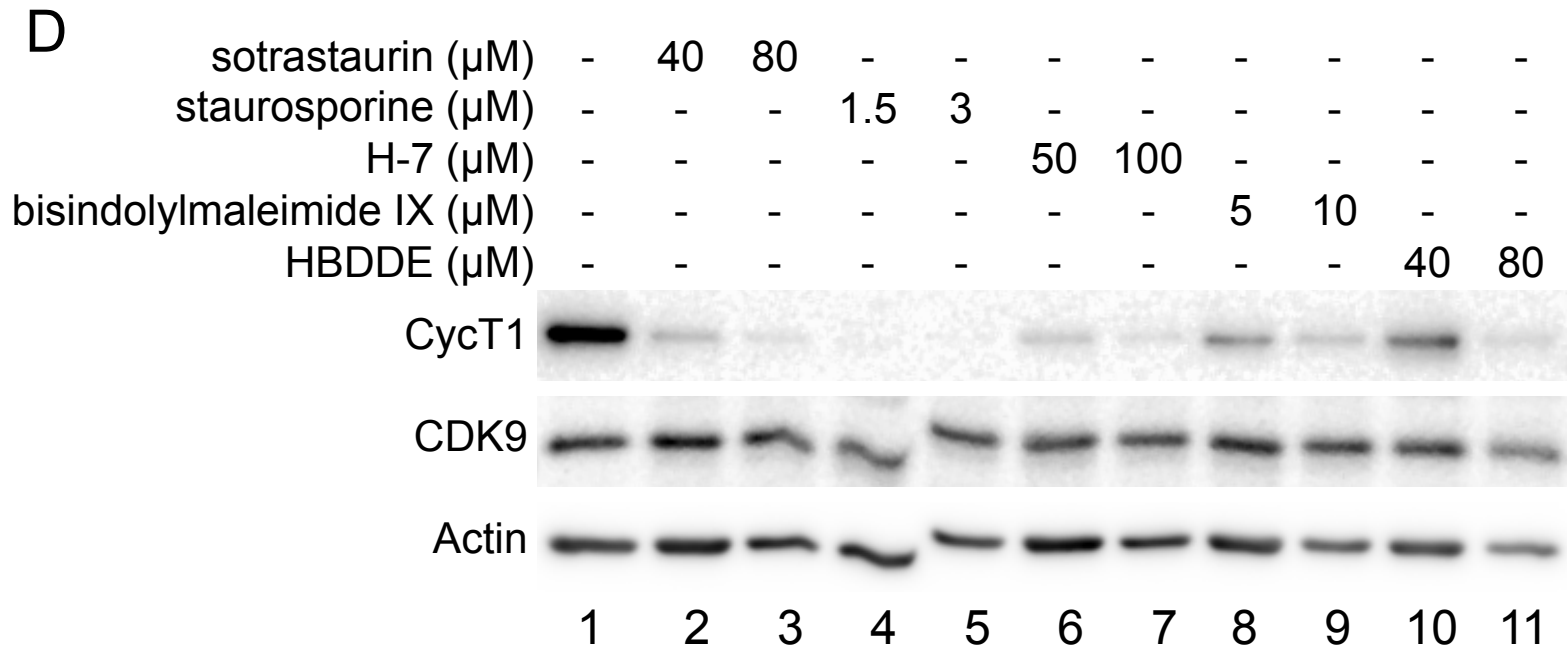

## Source blot for Figure supplement 2E

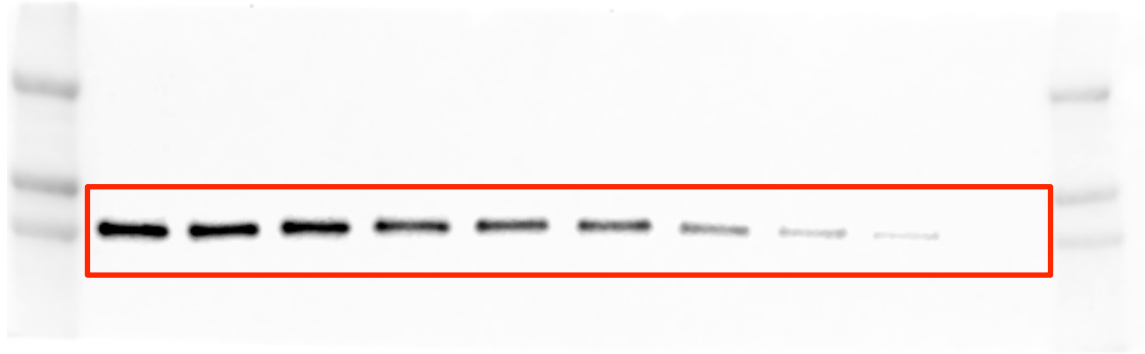

Red marked area was used for the figure.

Membrane was cut after transfer, and before probing by Ab

## Source blot for Figure supplement 2E

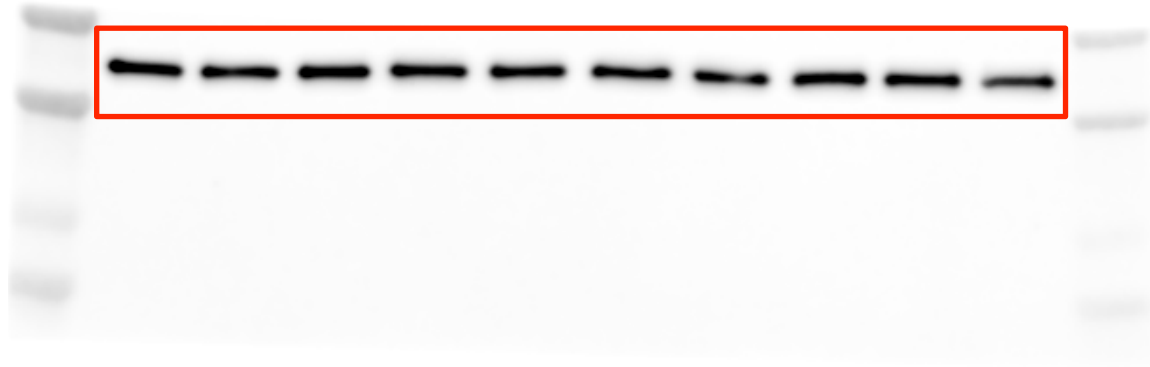

Red marked area was used for the figure.

Membrane was cut after transfer, and before probing by Ab

Fig. S2. PKC inhibitors promote CycT1 degradation in different cells

Activated Primary CD4+ T cells

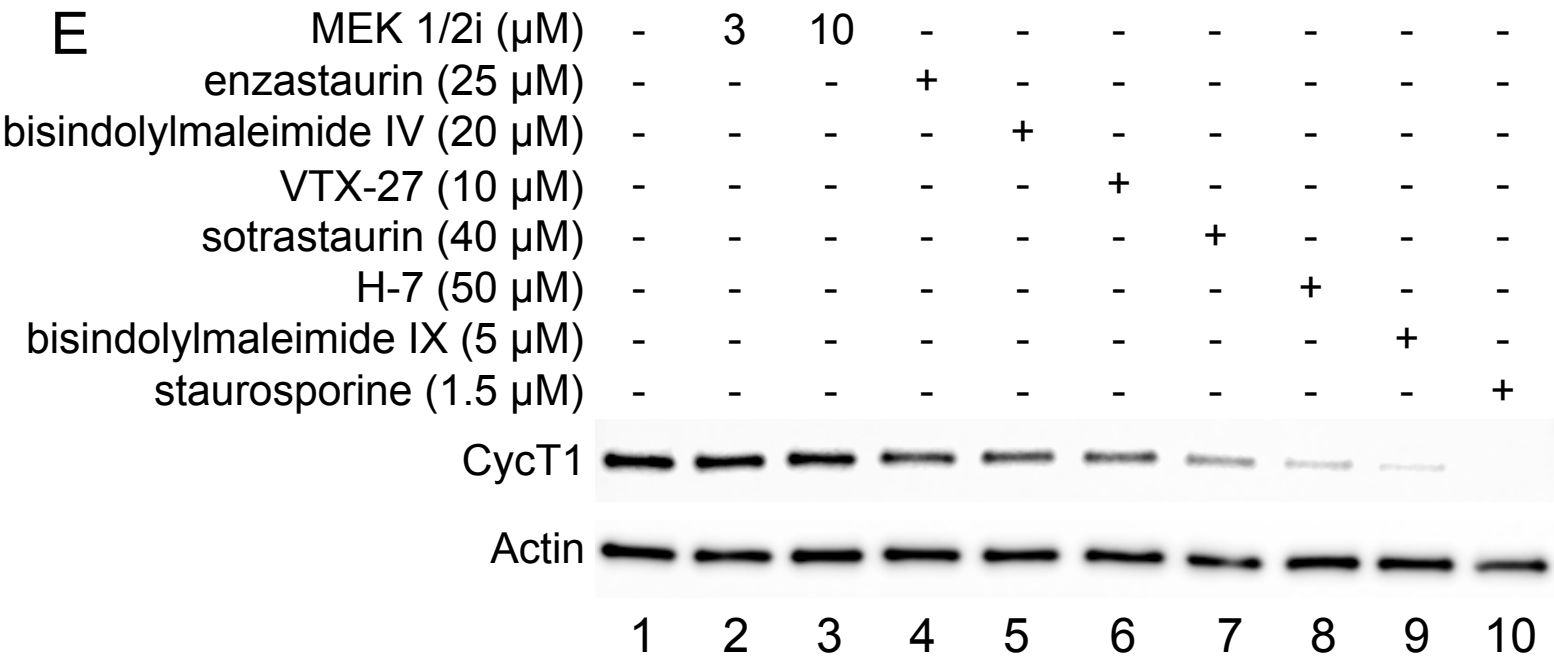

# Source blot for Figure supplement 3A

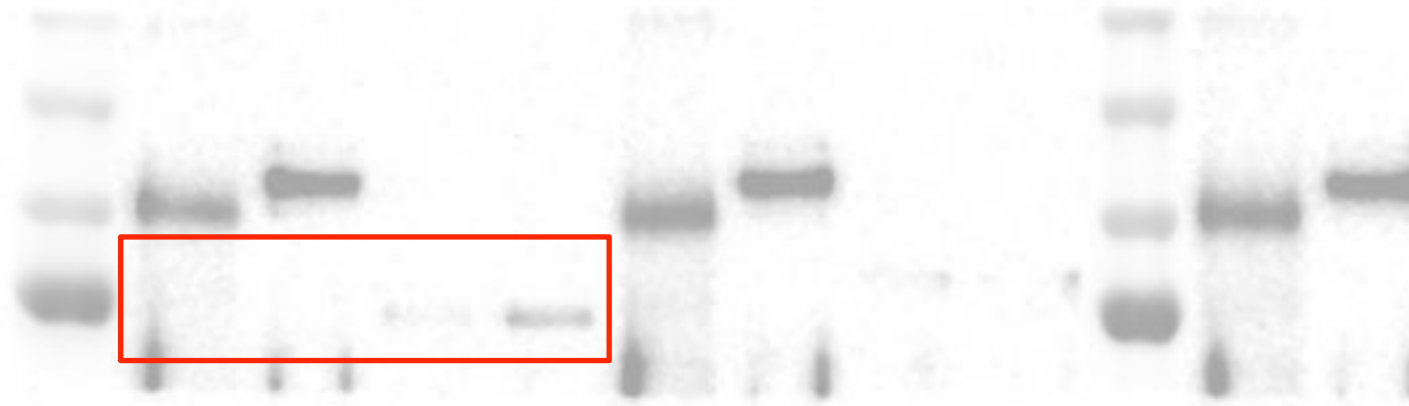

Red marked area was used for the figure.

Membrane was cut after transfer, and before probing by Ab

## Source blot for Figure supplement 3A

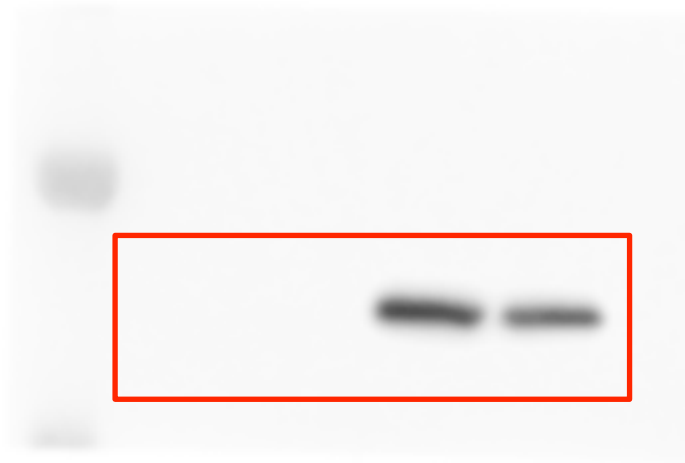

Red marked area was used for the figure.

Membrane was cut after transfer, and before probing by Ab

## Source blot for Figure supplement 3A

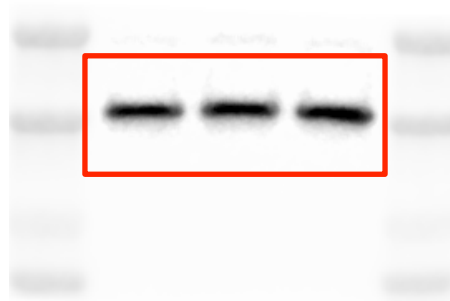

Red marked area was used for the figure.

Membrane was cut after transfer, and before probing by Ab

## Source blot for Figure supplement 3A

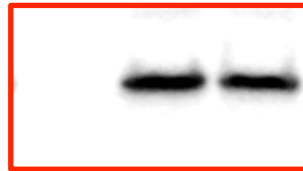

Red marked area was used for the figure.

Membrane was cut after transfer, and before probing by Ab

Fig. S3. PKCδ, PKCγ, and PKCε bind weakly to CycT1

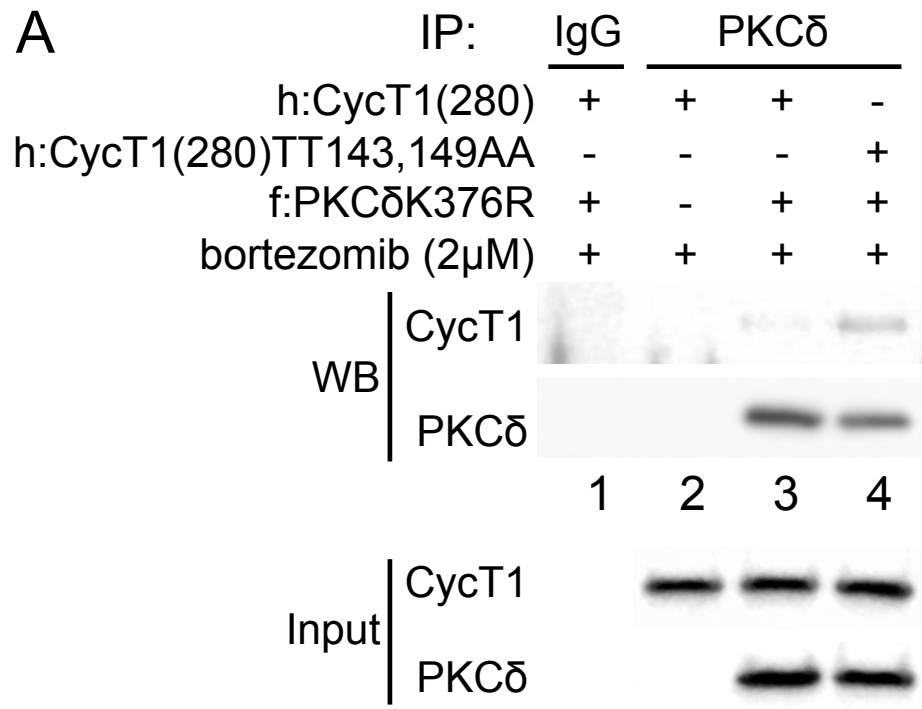

# Source blot for Figure supplement 3B

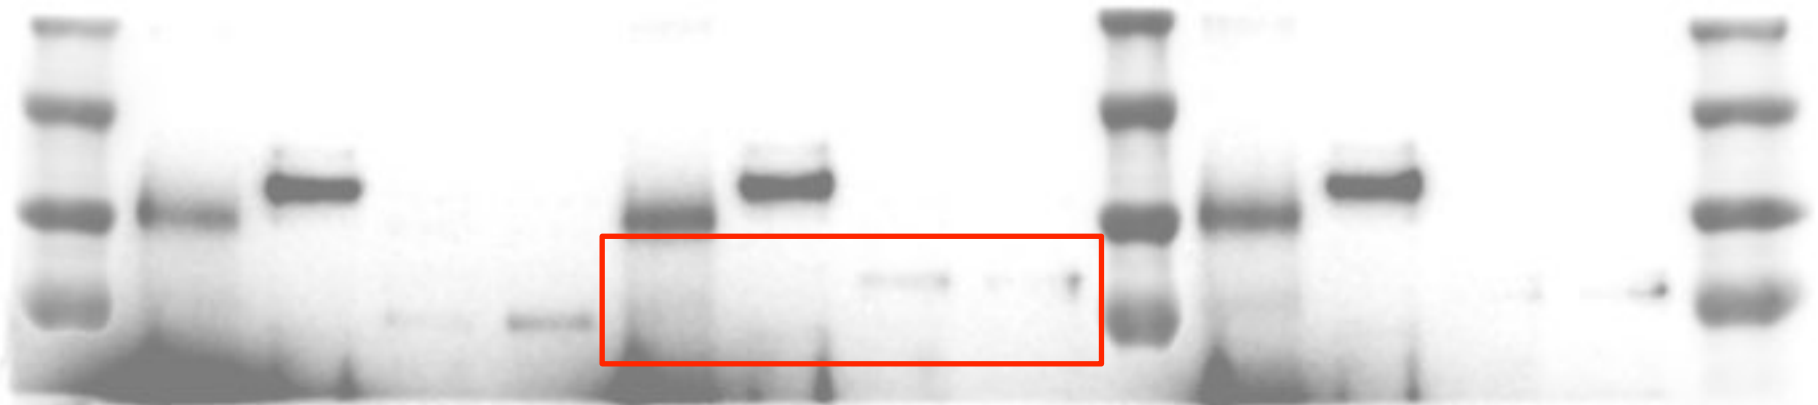

Red marked area was used for the figure.

Membrane was cut after transfer, and before probing by Ab  
Other lanes are different proteins under different conditions

# Source blot for Figure supplement 3B

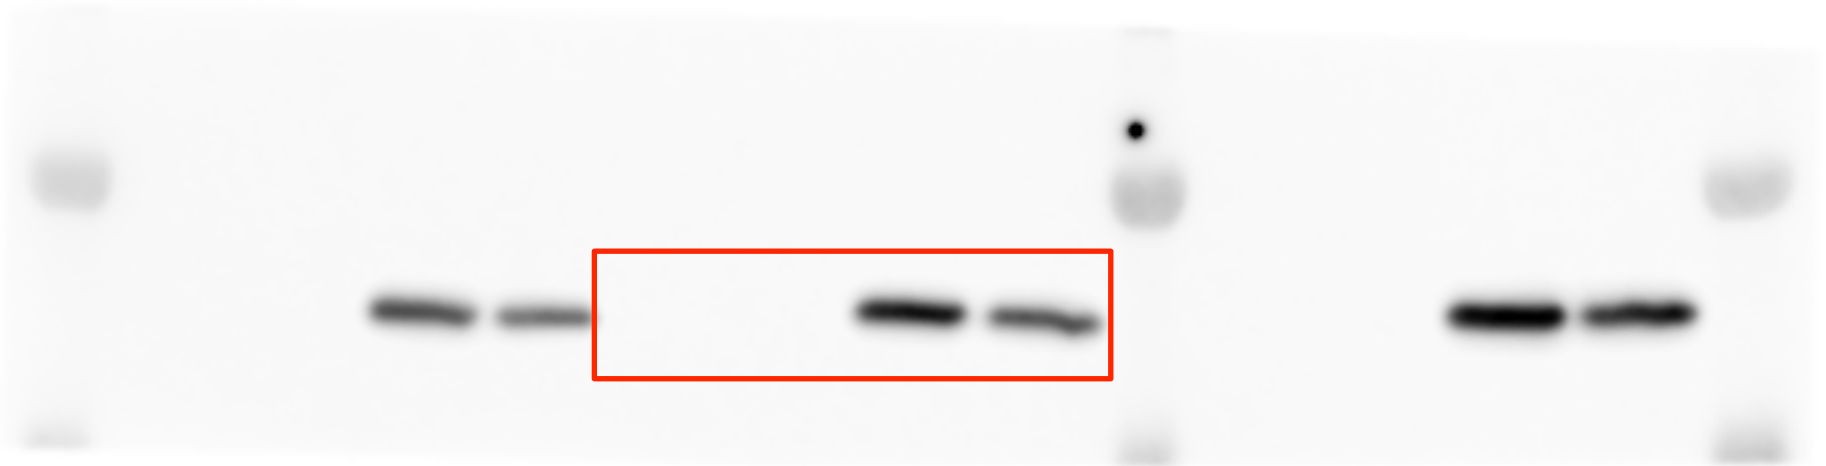

Red marked area was used for the figure.

Membrane was cut after transfer, and before probing by Ab  
Other lanes are the same proteins under different conditions

## Source blot for Figure supplement 3B

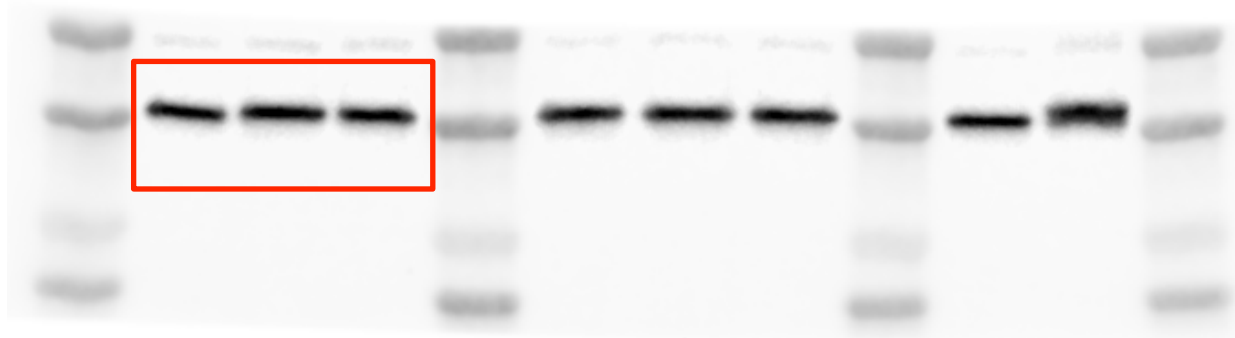

Red marked area was used for the figure.

Membrane was cut after transfer, and before probing by Ab  
Other lanes are the same proteins under different conditions

# Source blot for Figure supplement 3B

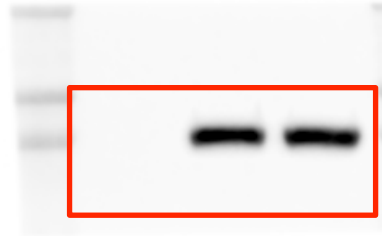

Red marked area was used for the figure.

Membrane was cut after transfer, and before probing by Ab

Fig. S3. PKCδ, PKCγ, and PKCε bind weakly to CycT1

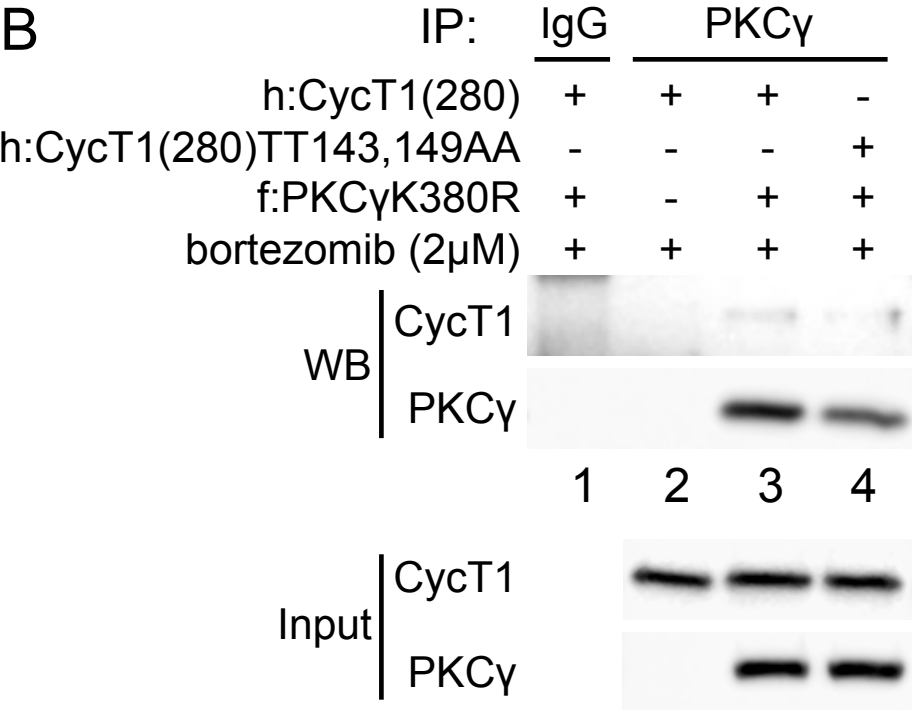

# Source blot for Figure supplement 3C

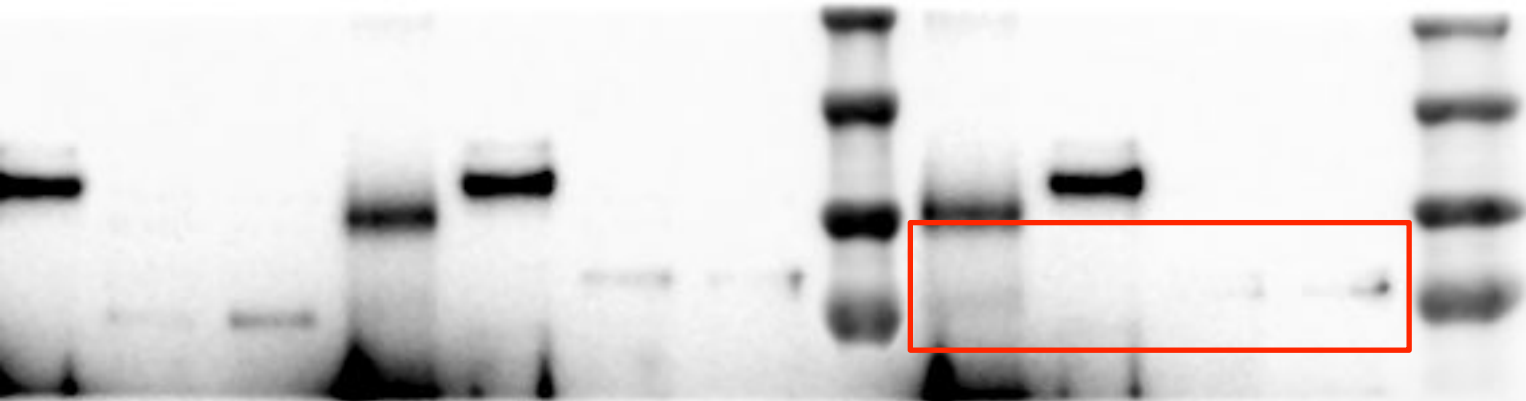

Red marked area was used for the figure.

Membrane was cut after transfer, and before probing by Ab  
Other lanes are different proteins under different conditions

# Source blot for Figure supplement 3C

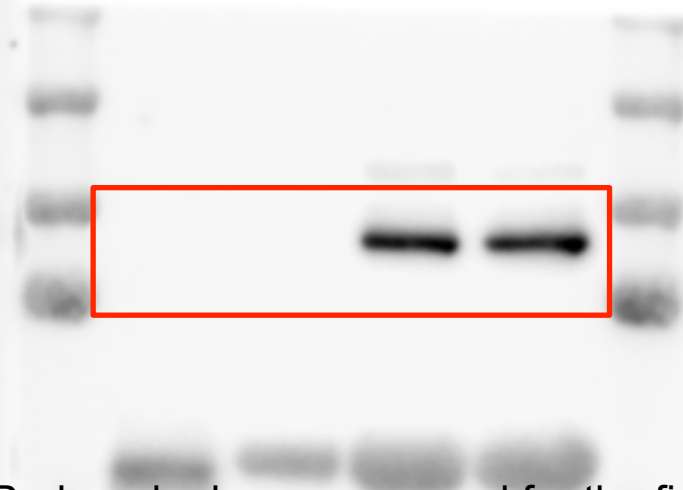

Red marked area was used for the figure.

Membrane was cut after transfer, and before probing by Ab

## Source blot for Figure supplement 3C

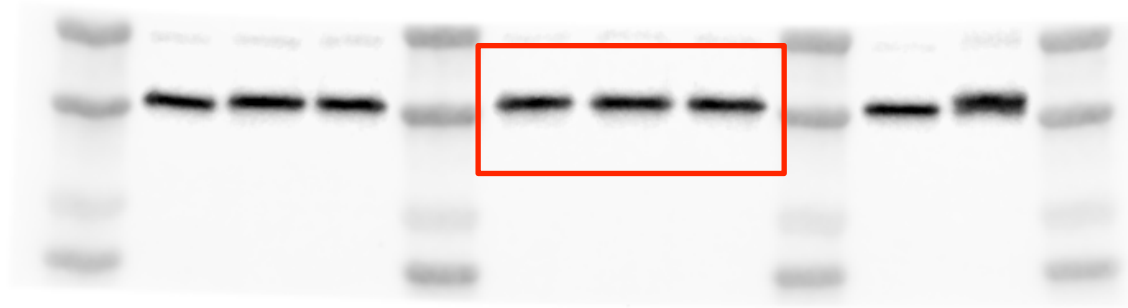

Red marked area was used for the figure.

Membrane was cut after transfer, and before probing by Ab  
Other lanes are the same proteins under different conditions

## Source blot for Figure supplement 3C

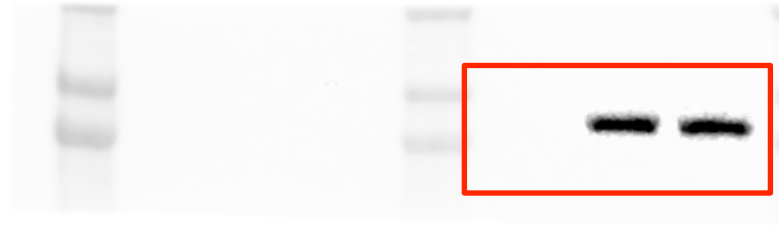

Red marked area was used for the figure.

Membrane was cut after transfer, and before probing by Ab

Fig. S3. PKCδ, PKCγ, and PKCε bind weakly to CycT1

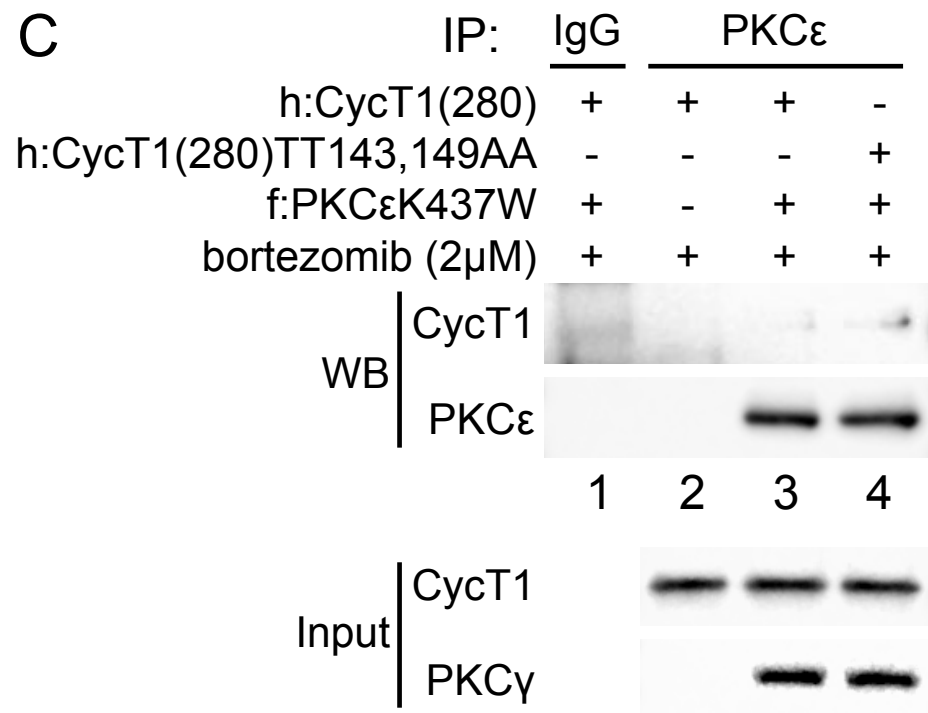

# Source blot for Figure supplement 4A

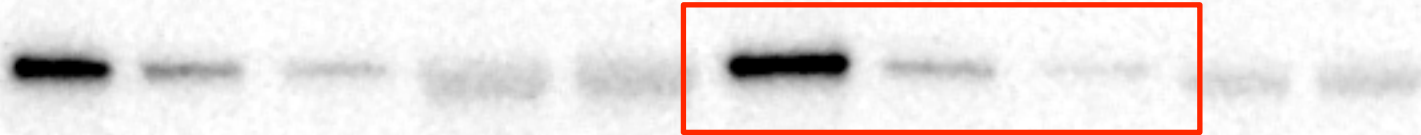

Red marked area was used for the figure.

Membrane was cut after transfer, and before probing by Ab  
Left lanes the same proteins from 1st donor

# Source blot for Figure supplement 4A

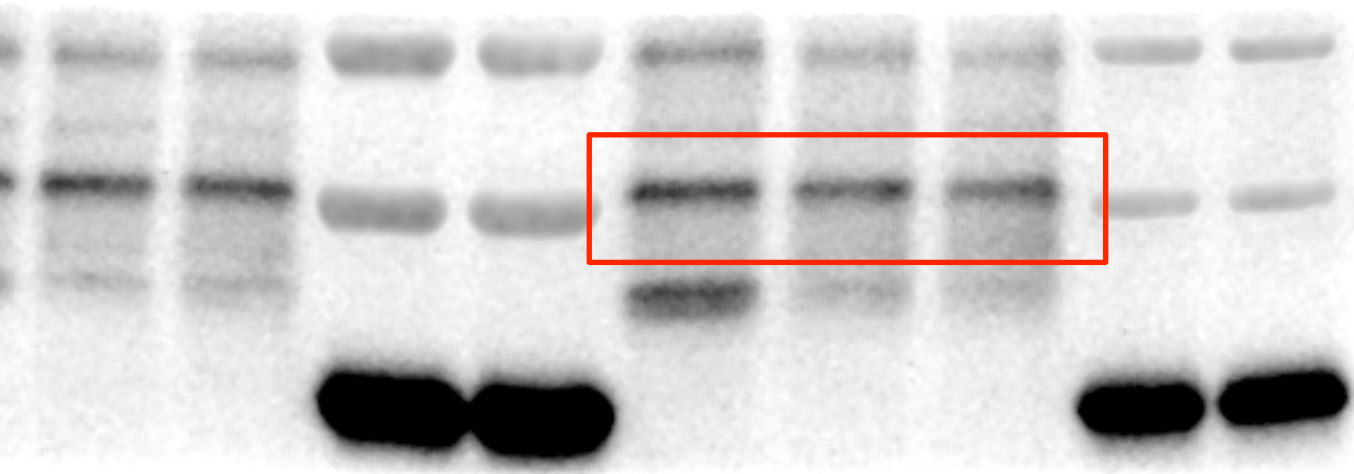

Red marked area was used for the figure.

Membrane was cut after transfer, and before probing by Ab  
Left lanes the same proteins from 1st donor

# Source blot for Figure supplement 4A

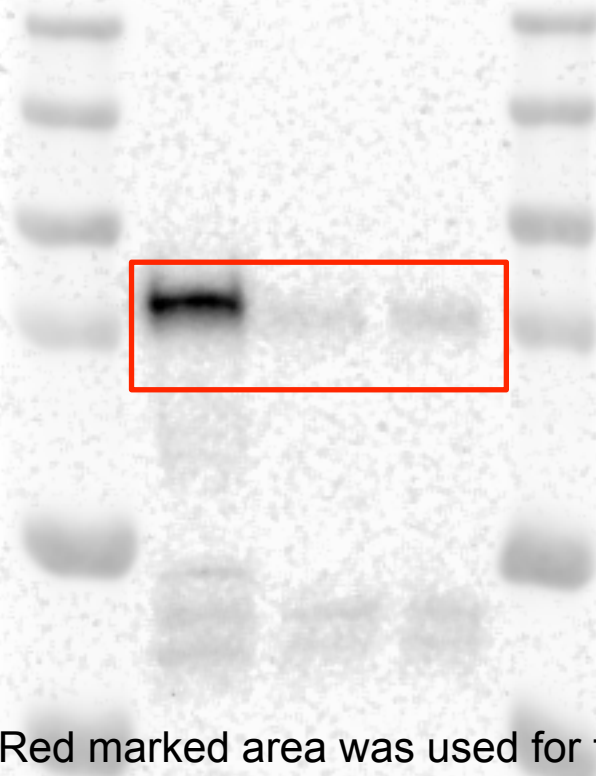

Red marked area was used for the figure.

Membrane was cut after transfer, and before probing by Ab

# Source blot for Figure supplement 4A

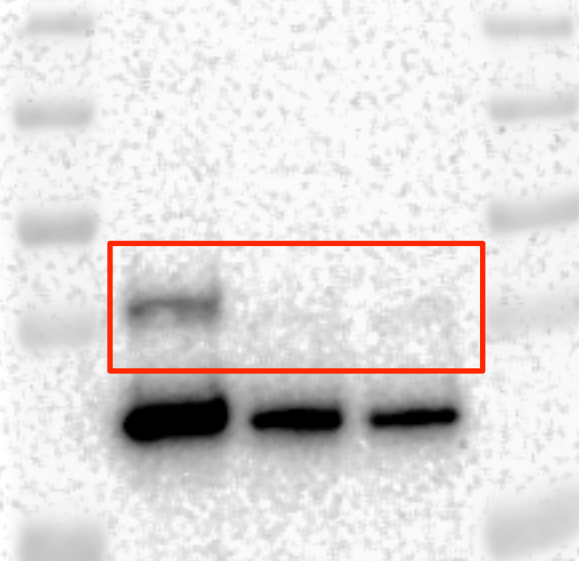

Red marked area was used for the figure.

Membrane was cut after transfer, and before probing by Ab  
lower bands are unspecific detection by target antibodies

# Source blot for Figure supplement 4A

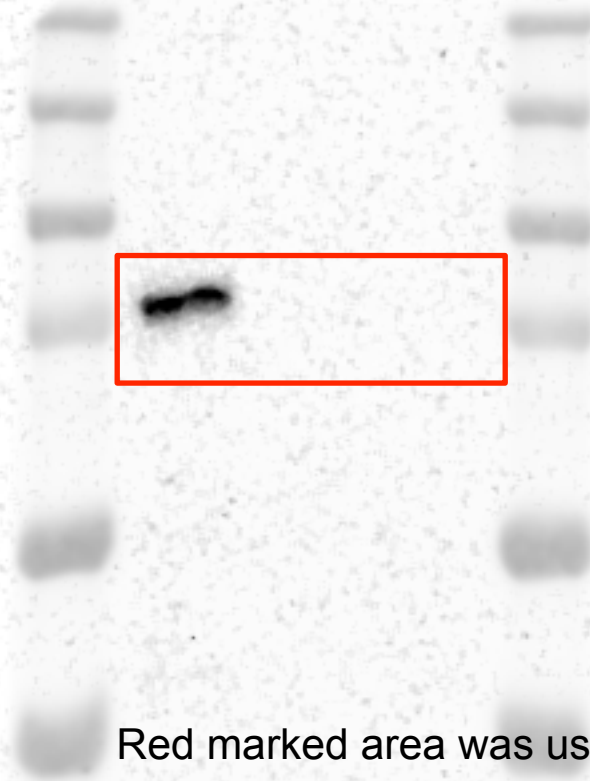

Red marked area was used for the figure.

Membrane was cut after transfer, and before probing by Ab

Source blot for Figure supplement 4A

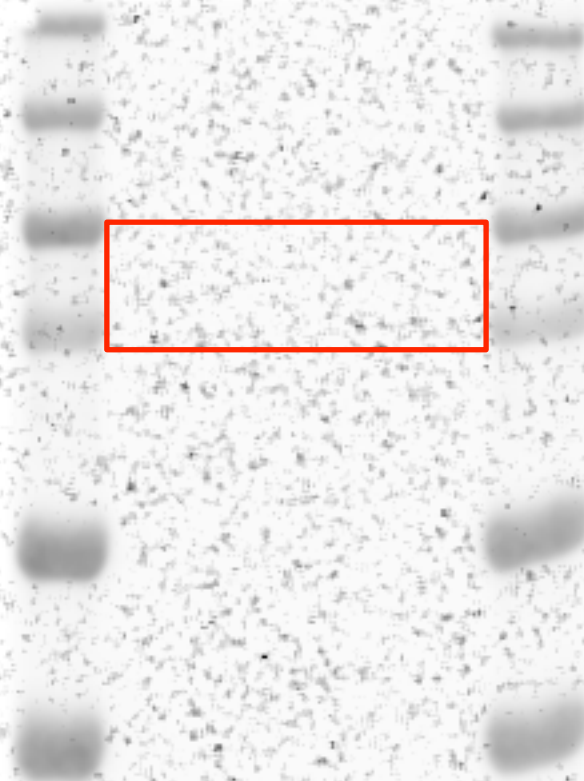

Red marked area was used for the figure.

Membrane was cut after transfer, and before probing by Ab

# Source blot for Figure supplement 4A

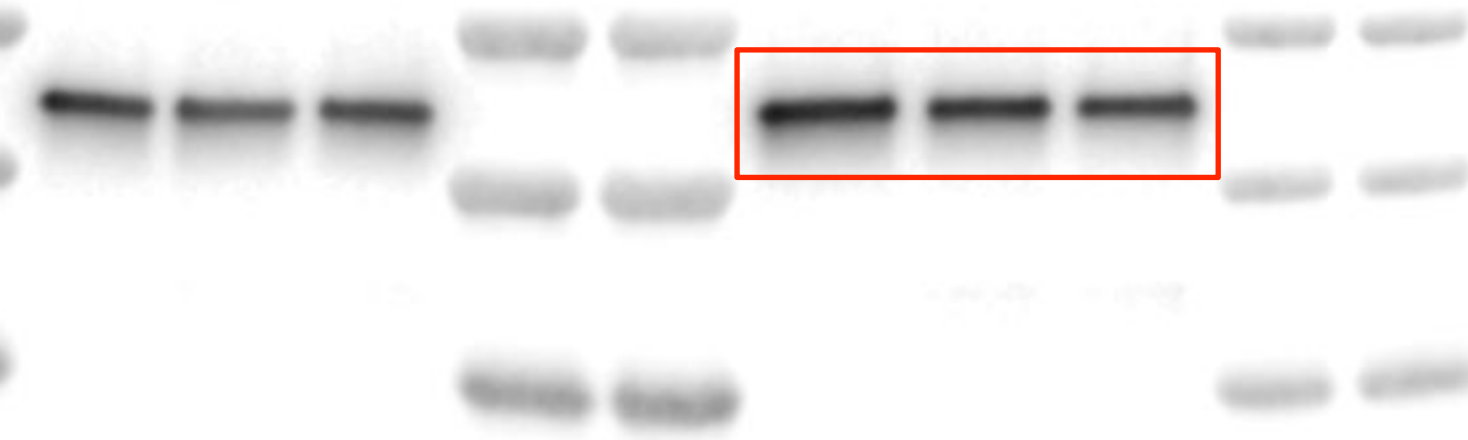

Red marked area was used for the figure.

Membrane was cut after transfer, and before probing by Ab  
Left lanes the same proteins from 1st donor

Fig. S4. Chronic activation in primary cells decreases levels of endogenous CycT1 protein

Activated Primary CD4+ T cells

Donor 2

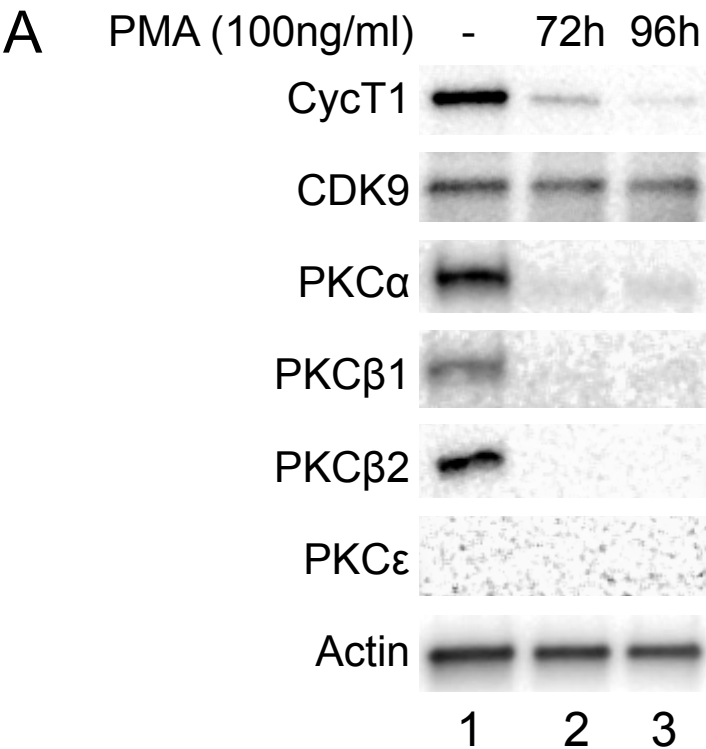

## Source blot for Figure supplement 4B

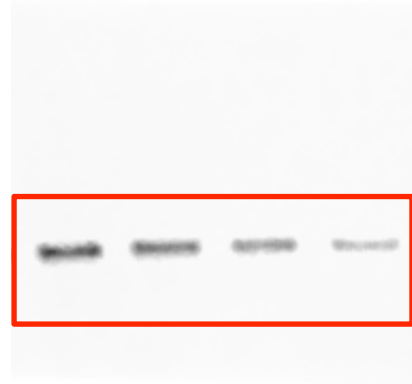

Red marked area was used for the figure.

Membrane was cut after transfer, and before probing by Ab

Source blot for Figure supplement 4B

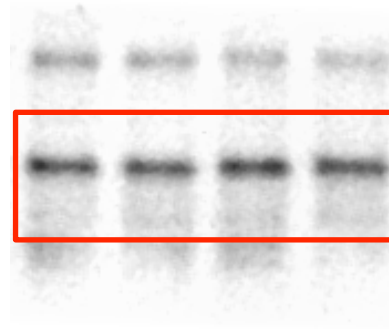

Red marked area was used for the figure.

Membrane was cut after transfer, and before probing by Ab

## Source blot for Figure supplement 4B

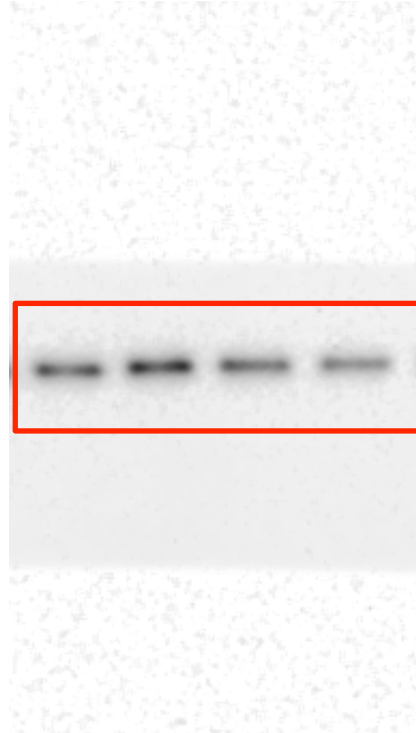

Red marked area was used for the figure.

Membrane was cut after transfer, and before probing by Ab

Fig. S4. Chronic activation in primary cells decreases levels of endogenous CycT1 protein

Activated Primary CD4+ T cells

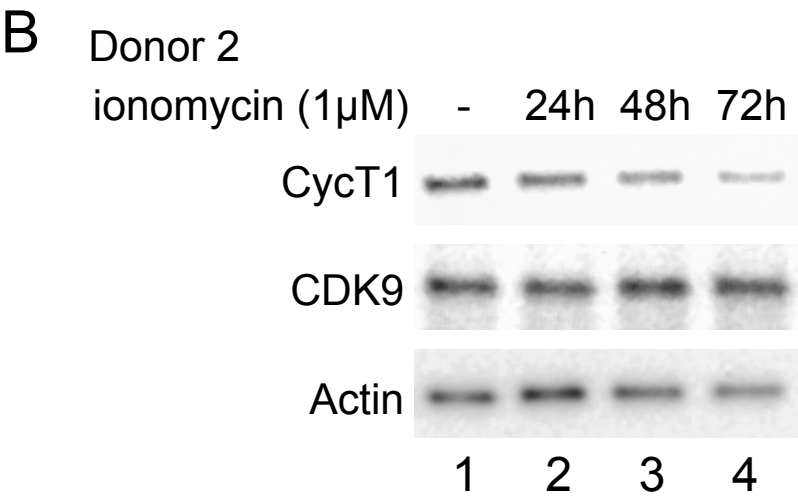

Supplement: Source data 1. [file elife-68473-supp1.pdf]
